# Supplementary material for: Aryl diazonium intermediates enable mild DNA-compatible C–C bond formation for medicinally relevant combinatorial library synthesis
Source: Royal Society of Chemistry journal article supplement (doi:10.1039/d2sc04482j), 2022-01-01
Supplement: d2sc04482j1.pdf [file d2sc04482j1.pdf]

## Supplementary Information

### **Aryl diazonium intermediates enable mild DNA-compatible C-C bond formation for medically relevant combinatorial library synthesis**

Xianfeng Li,<sup>‡a</sup> Juan Zhang,<sup>‡a</sup> Changyang Liu,<sup>a</sup> Jie Sun,<sup>a</sup> Yangfeng Li,<sup>ab</sup> Gong Zhang<sup>\*ab</sup> and Yizhou Li<sup>\*abcd</sup>

#### Affiliation

<sup>a</sup> Chongqing Key Laboratory of Natural Product Synthesis and Drug Research, Innovative Drug Research Center, School of Pharmaceutical Sciences, Chongqing University, Chongqing 401331, P. R. China.

<sup>b</sup> Chemical Biology Research Center, School of Pharmaceutical Sciences, Chongqing University, 401331, Chongqing, P. R. China.

<sup>c</sup> Key Laboratory of Biorheological Science and Technology, Ministry of Education, College of Bioengineering, Chongqing University, Chongqing, 400044, P. R. China

<sup>d</sup> Beijing National Laboratory for Molecular Sciences, 100190 Beijing, P. R. China

<sup>‡</sup> These authors contributed equally to this work.

<sup>\*</sup> Corresponding authors:

E-mail address: [gongzhang@cqu.edu.cn](mailto:gongzhang@cqu.edu.cn) (Gong Zhang); [yizhouli@cqu.edu.cn](mailto:yizhouli@cqu.edu.cn) (Yizhou Li)

# Contents

|                                                                                                                  |           |
|------------------------------------------------------------------------------------------------------------------|-----------|
| <b>1. Abbreviations.....</b>                                                                                     | <b>4</b>  |
| <b>2. Materials and General Methods.....</b>                                                                     | <b>5</b>  |
| 2.1 Materials and equipment.....                                                                                 | 5         |
| 2.2 DNA sequences and characterization .....                                                                     | 6         |
| 2.3 General methods for monitoring and characterization of small molecules .....                                 | 6         |
| 2.4 General methods for DNA purification and quantification .....                                                | 6         |
| 2.5 General procedure for DNA ligation .....                                                                     | 8         |
| 2.6 General procedure for polyacrylamide gel electrophoresis .....                                               | 8         |
| 2.7 General procedure for agarose gel electrophoresis.....                                                       | 8         |
| <b>3. Investigation of on-DNA diazotization conditions by azide transformation .....</b>                         | <b>10</b> |
| 3.1 General procedure for on-DNA amidation .....                                                                 | 10        |
| 3.2 Optimization of diazotization reagent and the formation of on-DNA phenyl azide.....                          | 10        |
| 3.3 Demonstration of substrate scope of tBuONO diazotization condition.....                                      | 15        |
| <b>4. Standard reaction establishment of on-DNA Pd-catalyzed coupling via aryl diazonium intermediates .....</b> | <b>17</b> |
| 4.1 General methods for on-DNA Suzuki-Miyaura coupling.....                                                      | 17        |
| 4.2 General methods for on-DNA Heck reaction .....                                                               | 18        |
| 4.3 General methods for on-DNA Hiyama reaction .....                                                             | 19        |
| 4.4 Optimization of the model reaction .....                                                                     | 20        |
| 4.5 Structure validation of on-DNA synthesized products .....                                                    | 21        |
| 4.5.1 Validation of on-DNA Suzuki-Miyaura coupling product 3a by co-injection assay..                            | 21        |
| 4.5.2 Off-DNA synthesis of authentic S5a .....                                                                   | 22        |
| 4.5.3 Validation of on-DNA Heck coupling product 5a by co-injection assay .....                                  | 24        |
| 4.5.4 Validation of On-DNA Hiyama coupling product 10a by co-injection assay .....                               | 25        |
| <b>5. Substrate scopes of on-DNA Suzuki-Miyaura, Heck reaction and Hiyama reaction .....</b>                     | <b>26</b> |
| 5.1 Substrate scope of boronic acids for the on-DNA Suzuki-Miyaura coupling .....                                | 26        |
| 5.2 Substrate scope of DNA-conjugated arylamines for the on-DNA Suzuki-Miyaura coupling.....                     | 29        |
| 5.3 Substrate scope of olefins for the on-DNA Heck reaction .....                                                | 31        |
| 5.4 Substrate scope of DNA-conjugated arylamines for the on-DNA Heck reaction .....                              | 35        |
| 5.5 Substrate scope of arylamines for the reverse on-DNA Heck reaction .....                                     | 41        |

|                                                                                                                                        |            |
|----------------------------------------------------------------------------------------------------------------------------------------|------------|
| 5.6 Substrate scope of DNA-conjugated arylamines for the on-DNA Hiyama reaction .....                                                  | 43         |
| 5.7 Scale-up reactions .....                                                                                                           | 44         |
| <b>6. Application of on-DNA carbon-carbon bond formation in DEL construction .....</b>                                                 | <b>46</b>  |
| 6.1 on-DNA branched molecule synthesis.....                                                                                            | 46         |
| 6.2 on-DNA linear molecule synthesis .....                                                                                             | 47         |
| 6.2 Verification of DNA enzymatic ligation compatibility .....                                                                         | 48         |
| 6.3 Verification of PCR and sequencing compatibility of DNA barcodes .....                                                             | 49         |
| 6.4 DNA Sequences .....                                                                                                                | 52         |
| <b>7. Application of on-DNA carbon-carbon bond formation in DNA-encoded pharmaceutical compound and chemical probe synthesis .....</b> | <b>53</b>  |
| 7.1 Comparative study of on-DNA functional group synthesis.....                                                                        | 53         |
| 7.2 Comparative study of on-DNA pharmacophore (HDAC inhibitor) synthesis.....                                                          | 57         |
| 7.3 General method for DNA Programmed Affinity Labeling (DPAL).....                                                                    | 60         |
| <b>8. UPLC chromatograph and deconvoluted MS.....</b>                                                                                  | <b>61</b>  |
| 8.1 Substrate scope of DNA-conjugated arylamines for the On-DNA azide transformation..                                                 | 61         |
| 8.2 Substrate scope of DNA-conjugated azide for the On-DNA CuAAC reaction.....                                                         | 65         |
| 8.3 Substrate scope of boronic acids for the on-DNA Suzuki-Miyaura coupling with 1a .....                                              | 68         |
| 8.4 Substrate scope of DNA-conjugated arylamines for the On-DNA Suzuki-Miyaura coupling .....                                          | 85         |
| 8.5 Substrate scope of olefins for the on-DNA Heck reaction with 1a.....                                                               | 96         |
| 8.6 Substrate scope of DNA-conjugated arylamines for the on-DNA Heck reaction with 4o .....                                            | 123        |
| 8.7 Substrate scope of DNA-conjugated arylamines for the on-DNA Heck reaction with 4r .....                                            | 140        |
| 8.8 Substrate scope of anilines for the reverse on-DNA Heck reaction with 6a .....                                                     | 157        |
| 8.9 Substrate scope of DNA-conjugated arylamines for the On-DNA Hiyama coupling .....                                                  | 164        |
| <b>9. Reference .....</b>                                                                                                              | <b>170</b> |

## 1. Abbreviations

BP: binding probe

CP: capture probe

CuAAC: Copper-catalyzed azide-alkyne cycloaddition

DCM: dichloromethane

DIPEA: *N, N*-diisopropylethylamine

DMA: *N, N*-dimethyl acetamide

DMT-MM: 4-(4, 6-dimethoxy-1,3,5-triazin-2-yl)-4-methylmorpholinium chloride

HFIP: 1, 1, 1, 3, 3, 3-hexafluoro-2-propanol

HP: headpiece

HP-P: headpiece primer

HPLC: high performance liquid chromatography

NMR: nuclear magnetic resonance

PAGE: polyacrylamide gel electrophoresis

PB: phosphate buffer

PBS: phosphate buffered saline

TEAA: triethylammonium acetate

TEA: trimethylamine

TLC: thin layer chromatography

TIC: total ion chromatogram

UPLC-MS: Ultra performance liquid chromatography- mass spectrum

UV: ultraviolet



## **2. Materials and General Methods**

### **2.1 Materials and equipment**

Unless otherwise noted, all reagents and solvents were purchased from commercial sources and used as received. Chemicals and reagents were purchased from several commercial suppliers including Bidepharm, Adamas and Sigma-Aldrich, etc., and were generally used without further purification. T4 DNA ligase and 10× ligation buffer (500 mM Tris pH 7.5, 500 mM NaCl, 100 mM MgCl<sub>2</sub>, 100 mM DTT and 25 mM ATP) were purchased from HitGen Inc.. All buffers and aqueous solutions were prepared in-house. Protein samples were separated and analyzed by SDS-PAGE. All gel images were captured by a Bio-Rad Chemidoc<sup>TM</sup> imaging system. Photo-crosslinking experiments were conducted by a UVP CL-1000 Ultraviolet crosslinker at 365 nm wavelengths. Concentrations of oligonucleotides were determined by the absorbance at 260 nm with a BioTek Epoch 2 plate reader.

Experimental data were achieved with the equipment listed below: NMR Spectrometers (Agilent 400 MHz), UHPLC-MS (Agilent 1290 and Agilent 6230 Time-of-Flight), HPLC (Waters 1575EF Series), UV-Vis spectrometer (BioTek Epoch), centrifuge (Eppendorf 5424 R), DNA synthesizer (Applied Biosystems 3400) and other instruments.

## 2.2 DNA sequences and characterization

### a) DNA sequences

All the DNA sequences were written in 5'-to 3'-orientation unless otherwise noted.

**Headpiece (HP):**

5'-/5Phos/GAGTCA/iSp9/iUniAmM/iSp9 /TGACTCCC-3'

**Headpiece-primer (HP-P):**

5'-/5Phos/ACCTTCGGTCGGGAGTCA/iSp9/iUniAmM

/iSp9/TGACTCCCGACCGAAGGTTG-3'

**Binding Probe (BP):** 5'-NH<sub>2</sub>-TGA CTC CCG ACC GAA GGT TG-3'

**Capture Probe (CP):** 5'-FAM-ACC TTC GGT CGG GAG TCA-NH<sub>2</sub>-3'

### b) Mass spectrometry characterization

| DNA  | expected mass | observed mass |
|------|---------------|---------------|
| HP   | 4937          | 4937          |
| HP-P | 12408         | 12408         |
| BP   | 6284          | 6284          |
| CP   | 6249          | 6249          |

## 2.3 General methods for monitoring and characterization of small molecules

Reactions were monitored by TLC or UPLC-MS. TLC analysis was visualized by using general staining reagents or UV light ( $\lambda = 254$  nm). Novel synthetic compounds were characterized by <sup>1</sup>H-NMR, <sup>13</sup>C-NMR, and HRMS. NMR spectrum was recorded on Agilent 400 MHz spectrometer using residual non-deuterated solvent (DMSO-*d*<sub>6</sub>) as the internal standard. Multiplicity abbreviations are as follows: s = singlet, brs = broad singlet, d = doublet (dd = doublet of doublets), t = triplet, q = quartet, m = multiplet. Unless otherwise noted, all deuterated solvents were purchased from Adamas.

## 2.4 General methods for DNA purification and quantification

**General method for ethanol precipitation:** To the DNA reaction mixture was added 10% (v/v) 3 M acetate buffer (pH 5.2) and 3 times the volume of cold (-20 °C) ethanol subsequently. The solution was maintained at -80 °C for over 2 h and then centrifuged

at 13,500 rpm for 30 min at 4 °C. The supernatant was discarded and the pellet was rinsed once with cold 70% ethanol. After centrifuging at 13,500 rpm for another 10 min at 4 °C, the supernatant was discarded and the pellet was dried by a speedvac. The recovered sample was then dissolved in an appropriate solvent for subsequent analysis or experiments. Eppendorf 5424R centrifuge is used for ethanol precipitation of all the DNA samples.

**General method for HPLC purification:** Preparative reversed-phase high-pressure liquid chromatography (RP-HPLC) for the DNA conjugate was performed on a Waters 1575EF Series with a reversed-phase HPLC column (Eclipse-XDB C18, 5  $\mu$ M, 9.4 $\times$ 250 mm) using eluent A (100 mM TEAA in H<sub>2</sub>O) and eluent B (100 mM TEAA in 80% MeCN) with gradient: 10% B (0 to 1 min), 10% to 30% B (1 to 11min), 30% to 100% B (11 to 11.1 min), 100% B (11.1 to 12 min), 100% to 10% B (12 to 12.1 min), 10% B (12.1 to 16 min). The fractions containing the product were combined and lyophilized overnight.

**General methods for DNA analysis:** Analysis of on-DNA reactions by UPLC-MS: After the reaction, an aliquot of the reaction mixture was diluted with H<sub>2</sub>O to approximately 1  $\mu$ M, 10-20  $\mu$ L sample was injected into a reversed-phase UPLC column (Agilent, AdvanceBio Oligonucleotide, C18, 2.1 $\times$ 50 mm, 2.7  $\mu$ m, maintained at 60 °C) at a flow rate of 0.3 mL/min. (Solvent A: 200 mM HFIP and 8 mM TEA in H<sub>2</sub>O; Solvent B: MeOH). The effluent was detected by absorbance at 260 nm, and analyzed on Agilent TOF (6230 B) in negative ion mode.

**Method I:** 5% to 15% B (0 to 1 min), 15% to 25% B (1 to 2 min), 25% to 30% B (2 to 5.5 min), 30% to 90% B (5.5 to 6 min), 90% B (6 to 6.5 min), 90% to 5% B (6.5 to 7 min), 5% B (7 to 8 min).

**Method II:** 5% to 15% B (0 to 1 min), 15% to 30% B (1 to 12 min), 30% to 90% B (12 to 12.1 min), 90% B (12.1 to 13 min), 90% to 5% B (13 to 13.1 min), 5% B (13.1 to 14 min).

**Method III:** 3% to 12% B (0 to 1 min), 12% to 18% B (1 to 2.5 min), 18% to 20% B (2.5 to 4 min), 20% to 22% B (4 to 6 min), 22% to 30% B (6 to 9 min), 30% to 85% B

(9 to 10 min), 85% B (10 to 11 min), 85% to 3% B (11 to 12 min)

**Conversion calculation:** The conversion of on-DNA product was determined from UV absorbance trace (260 nm) peak area by using the equation:  $\text{conversion\%} = \text{UV (product)} / \text{UV (total DNA recovered)}$ , ignoring the UV coefficient difference among all the DNA products and assuming 100% DNA recovery. Any non-oligo material that had an absorbance at UV 260 nm was subtracted from the conversion calculation.

**Analysis of molecular mass:** Observed  $m/z$  could be calculated as  $m/z = (m - z)/z$ . BioConfirm software (Agilent, v10.0) was used to deconvolute the multiple charge states.

## 2.5 General procedure for DNA ligation

This reaction contained variably derivatized **HP-P** starting material (10 nmol in H<sub>2</sub>O, 1 equiv.), Code (12 nmol in H<sub>2</sub>O, 1.2 equiv.), 10 × ligation buffer (4 µL), T4 DNA ligase (1 µL, 1000 units/µL) and nuclease-free H<sub>2</sub>O (to the total volume of 40 µL). The reaction mixture was incubated at 20 °C for overnight before performing gel analysis. The crude material was purified by ethanol precipitation and subjected to the next step of synthesis without further purification.

## 2.6 General procedure for polyacrylamide gel electrophoresis

Ligation reactions were monitored by gel electrophoresis with 20% urea polyacrylamide gel in 1× TBE buffer (89 mM Tris-Borate, 2 mM EDTA, pH 8.3) system referenced by a 20 bp DNA ladder (Takara, Japan). Before gel loading, the DNA samples were denatured at 95 °C for 10 min and mixed with 0.20 volume of the 6× gel loading buffer. Then, 10 pmol of treated DNA samples were loaded on the gel, and the gel was run at 200 V for 50-60 min. DNA fragments were visualized and analyzed by Bio-Rad Chemidoc<sup>TM</sup> Image System (Bio-Rad, CA, USA).

## 2.7 General procedure for agarose gel electrophoresis

Ligation reactions were monitored by 3% Agarose gel electrophoresis in 1× TBE buffer (89 mM Tris-Borate, 2 mM EDTA, pH 8.3) system referenced by a 20 bp DNA

ladder (Takara, Japan). Before gel loading, the DNA samples mixed with 0.20 volume of the 6× gel loading buffer. Then, 10 pmol of treated DNA samples were loaded on the gel, and the gel was run at 100 V for 30-45 min. DNA fragments were visualized and analyzed by Bio-Rad Chemidoc™ Image System (Bio-Rad, CA, USA).

### 3. Investigation of on-DNA diazotization conditions by azide transformation

#### 3.1 General procedure for on-DNA amidation

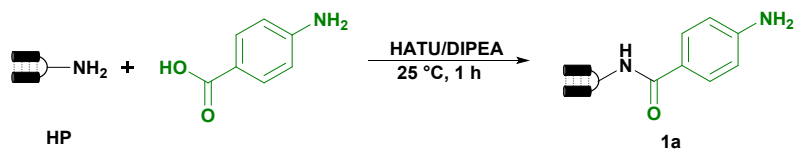

Pre-mixed solution: 4-aminobenzoic acid (4  $\mu$ L, 200 mM in DMA), HATU (4  $\mu$ L, 200 mM in DMA), and DIPEA (4  $\mu$ L, 200 mM in DMA).

To a solution of **HP** in pH 9.4 borate buffer (10  $\mu$ L, 1 mM in 250mM sodium borate buffer) was added 6  $\mu$ L pre-mixed solution. The mixture was vortexed and reacted at room temperature for 10 min, then was added another 4  $\mu$ L of pre-mixed solution. The mixture was vortexed and reacted at room temperature for 1 h, followed by ethanol precipitation.<sup>1</sup> The product was purified by preparative HPLC and quantified by UV absorption at 260 nm to give a conversion of >95%. The conjugate was characterized by UPLC-MS. Deconvoluted molecular mass: predicted: 5056; found: 5056.

#### 3.2 Optimization of diazotization reagent and the formation of on-DNA phenyl azide

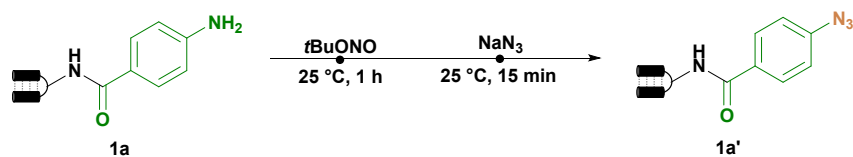

**On-DNA aryl diazonium salt formation:** To the DNA conjugate **1a** (8  $\mu$ L, 0.025 mM in H<sub>2</sub>O, 0.2 nmol) was added *t*BuONO (2  $\mu$ L, 50 mM in DMA, 100 nmol) and H<sub>2</sub>O (10  $\mu$ L). Then the resulting mixture was vortexed and allowed to react at 25 °C for 1 h.

**On-DNA phenyl azide formation:** To the solution of aryl diazonium intermediate was added NaN<sub>3</sub> (2  $\mu$ L, 500 mM in H<sub>2</sub>O, 1000 nmol). The reaction system was vortexed and stood at 25 °C for another 15 min. The product was ethanol precipitated and subjected to UPLC-MS analysis.

**Supplementary Table 1. Investigation of DNA compatibility of diazotization**

|                    | Entry | DNA                   | Nitrite           | Acid | Conversion (%) |
|--------------------|-------|-----------------------|-------------------|------|----------------|
| <b>Condition 1</b> | 1     | HP-ph-NH <sub>2</sub> | NaNO <sub>2</sub> | HCl  | >95            |
|                    | 2     | HP-ph                 | NaNO <sub>2</sub> | HCl  | 0              |
|                    | 3     | HP                    | NaNO <sub>2</sub> | HCl  | 0              |
| <b>Condition 2</b> | 4     | HP-ph-NH <sub>2</sub> | <i>t</i> BuONO    | /    | >95            |
|                    | 5     | HP-ph                 | <i>t</i> BuONO    | /    | 0              |
|                    | 6     | HP                    | <i>t</i> BuONO    | /    | 0              |

**Condition 1:** **1a** (8  $\mu$ L, 25  $\mu$ M in H<sub>2</sub>O, 0.2 nmol), NaNO<sub>2</sub> (2  $\mu$ L, 50 mM in H<sub>2</sub>O, 100 nmol), HCl (2  $\mu$ L, 100 mM in H<sub>2</sub>O, 200 nmol), and H<sub>2</sub>O (8  $\mu$ L), 25 °C for 1 h.

**Condition 2:** **1a** (8  $\mu$ L, 25  $\mu$ M in H<sub>2</sub>O, 0.2 nmol), *t*BuONO (2  $\mu$ L, 50 mM in DMA, 100 nmol) and H<sub>2</sub>O (10  $\mu$ L), 25 °C for 1 h.

When using NaNO<sub>2</sub>, HCl or *t*BuONO as the diazotization reagent, the formation of the corresponding aryl azides was observed in both reaction conditions shown by Method *I*. But when Method *II* (an elution method with the more gradual gradient) was used for detection, damage was detected in the NaNO<sub>2</sub>, HCl diazotization group. In detail, a tail peak was noticed after the major product peak, with the deconvoluted mass corresponding to a +1 Da shifted byproduct ([Supplementary Fig. 1](#)). Combining our data with the previously reported literature, we inferred that the byproduct matched the molecular weight of the nucleobase deamination side reaction ([Supplementary Fig. 2](#)). On the contrary, no obvious byproduct was observed in the *t*BuONO diazotization group.

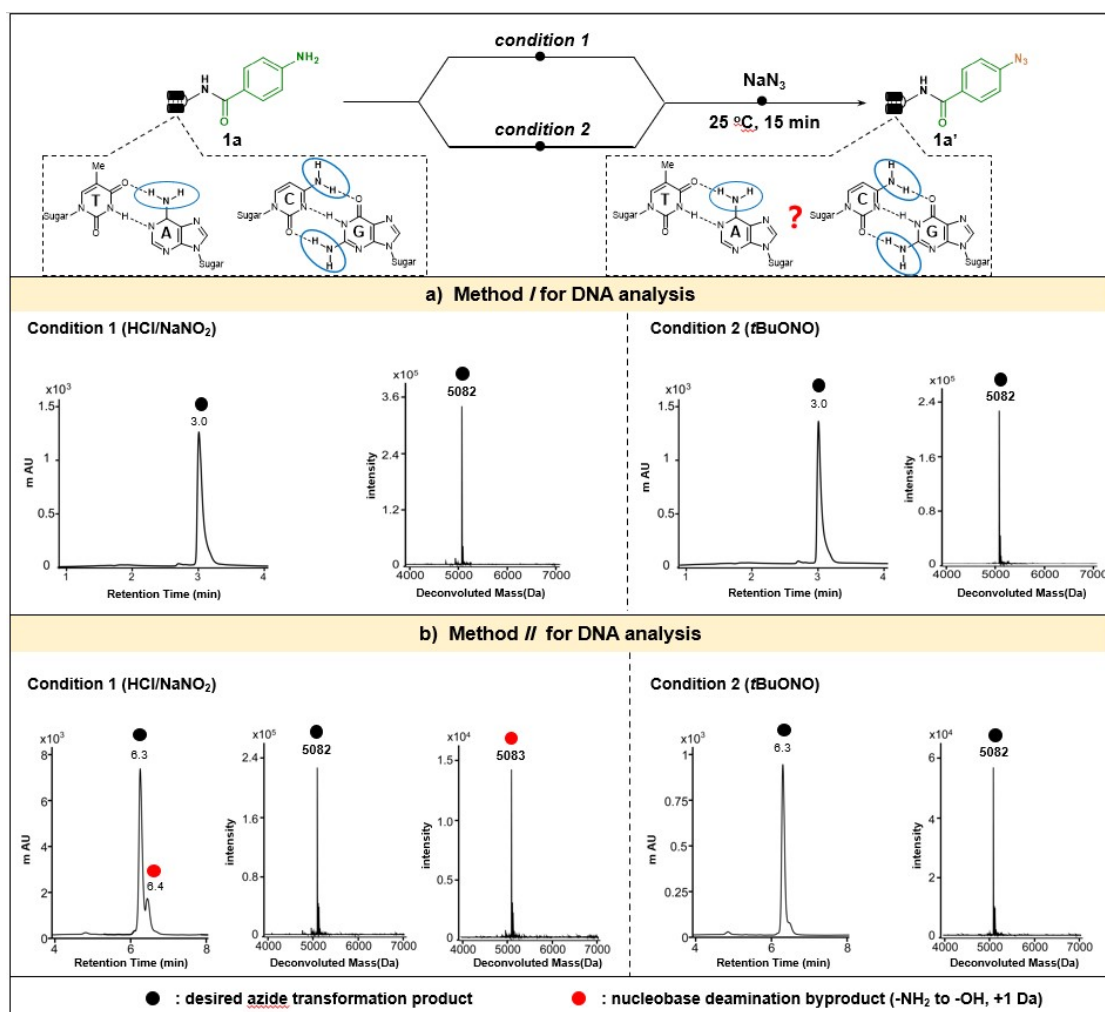

**Supplementary Fig.1 Investigation of DNA-compatible diazotization condition using Method *I* and *II* for UPLC-MS analysis**

No difference was observed between  $\text{NaNO}_2$ , HCl group and *t*BuONO group in aspects of chromatography and mass spectrometry by Method *I*. To examine the results carefully, we applied the method *II* with a different elution gradient. DNA damage was observed with  $\text{NaNO}_2$ , HCl treatment in aspects of chromatography and mass spectrometry by Method *II*. According to the literature, it is speculated that the DNA damage is caused by the diazotization of bases on DNA, including three bases containing arylamine-like structures, that is, Guanine, Adenine and Cytosine (Supplementary Fig. 2).



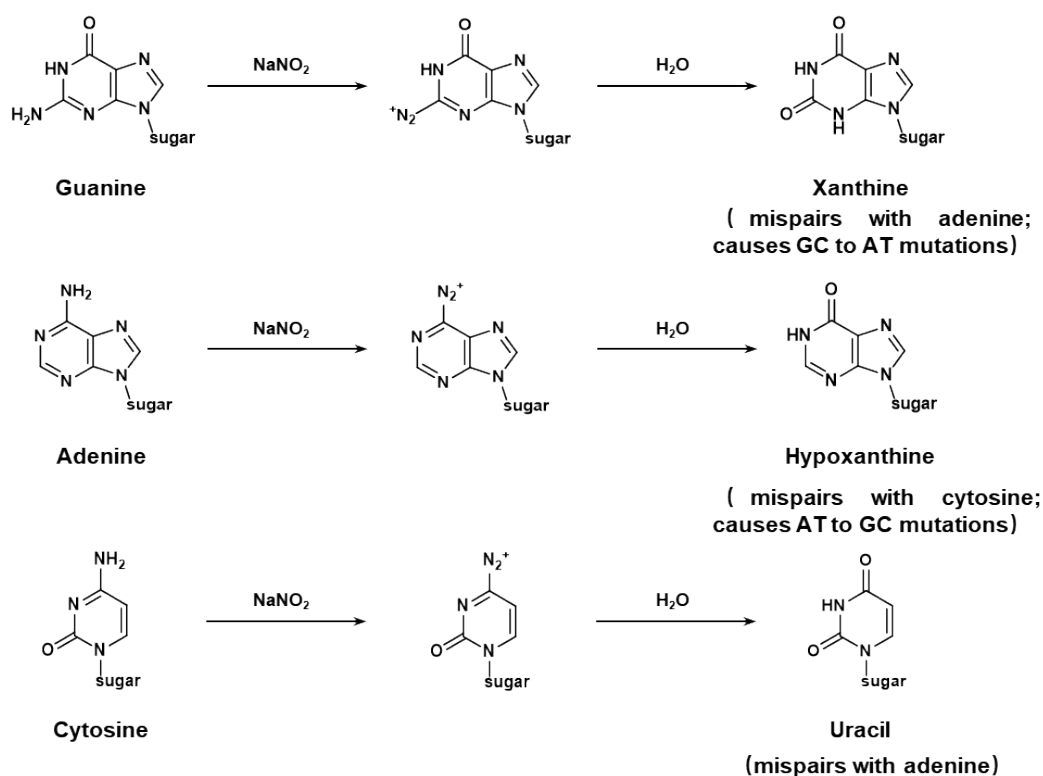

### Supplementary Fig. 2 Reported Mechanisms of nitrous acid-induced DNA mutation

Next, to further validate our diazotization strategy was compatible with DEL construction, we tried to evaluate the influence of the diazotization conditions to the enzymatic ligation process of DNA barcodes. For this experiment, we treated the DNA Headpiece (HP) with different diazotization reagents ( $t\text{BuONO}$  or  $\text{NaNO}_2/\text{HCl}$ ) of different concentrations (5 mM or 50 mM final concentration), respectively, and then performed T4 ligase-assisted enzymatic ligation experiments. By this way, we aimed to assess whether the diazotization strategy would potentially affect the construction of DELs.

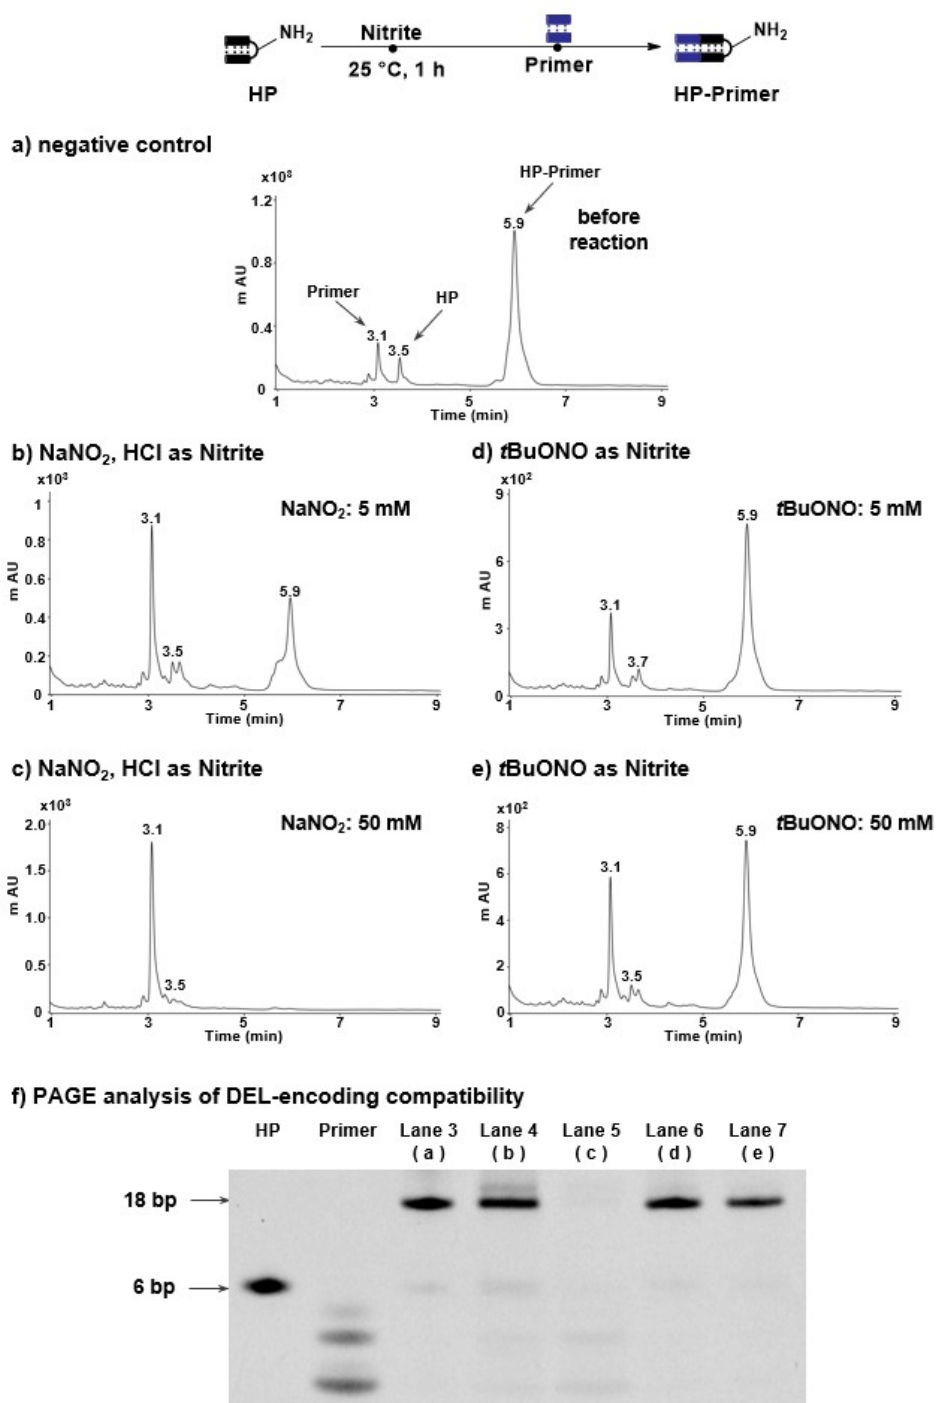

**Supplementary Fig. 3 Evaluation of DEL-encoding compatibility with different diazotization strategies. (a-e)** LC chromatograms of different diazotization conditions. **(f)** PAGE analysis of enzymatic ligation results. **Lane 1:** HP; **Lane 2:** primer; **Lane 3:** HP + primer, sample from **Fig. 3 a**); **Lane 4:** HP (NaNO<sub>2</sub>, 5 mM) + primer, sample from **Fig. 3 b**); **Lane 5:** HP (NaNO<sub>2</sub>, 50 mM) + primer, sample from **Fig. 3 c**); **Lane 6:** HP (*t*BuONO, 5 mM) + primer, sample from **Fig. 3 d**); **Lane 7** HP (*t*BuONO, 50 mM) + primer, sample from **Fig. 3 e**).

According to mass spectrometry data and enzymatic ligation results, we could reach the conclusion that *t*BuONO had better compatibility with DEL construction compared with the same concentration of NaNO<sub>2</sub>, HCl reagent. Therefore, we chose *t*BuONO as the diazotization reagent for further experiments.

### 3.3 Demonstration of substrate scope of *t*BuONO diazotization condition

Next, to prove the generality of *t*BuONO as a diazotization reagent on DNA, we used *t*BuONO to treat a diverse range of DNA-conjugated anilines, followed by NaN<sub>3</sub> nucleophilic substitution. Results demonstrated that the typical DNA-conjugated aniline substrates gained good to excellent conversion. Then, we attempted to convert the aryl azide generated in the previous step into the corresponding triazole product by CuAAC reaction. All the aryl azide yielded 1,2,3-triazole products with good to excellent conversion ([Supplementary Fig. 4](#)).

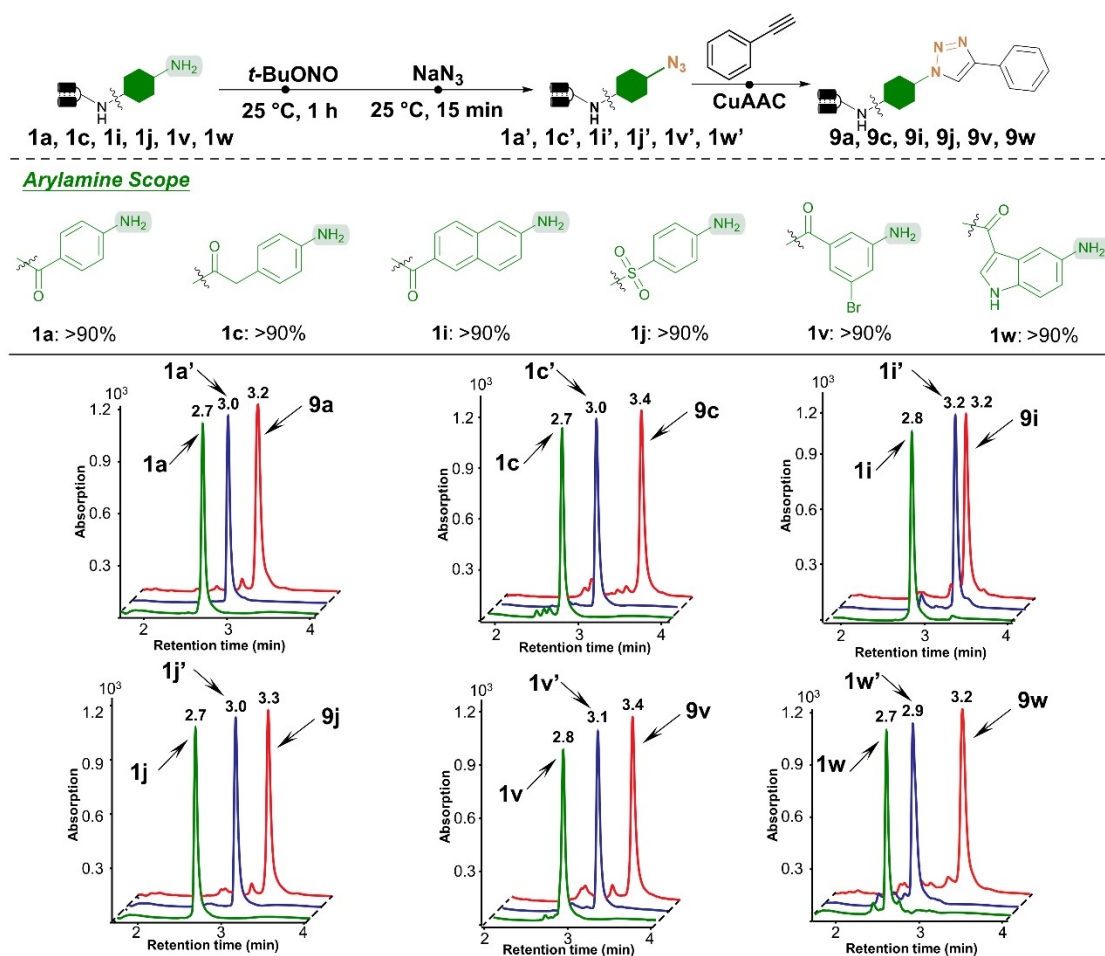

**Supplementary Fig. 4 Substrate scope of DNA-conjugated arylamines.**

The “green” curves indicate the arylamine starting materials, the “blue” curves represent the aryl azide product, while the “red” curves represent the final CuAAC products.

## 4. Standard reaction establishment of on-DNA Pd-catalyzed coupling via aryl diazonium intermediates

### 4.1 General methods for on-DNA Suzuki-Miyaura coupling

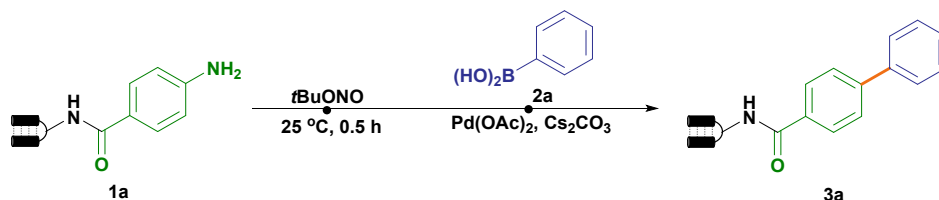

**On-DNA aryl diazonium salt formation:** To the DNA conjugate **1a** (8  $\mu$ L, 25  $\mu$ M in H<sub>2</sub>O, 0.2 nmol) was added *t*BuONO (2  $\mu$ L, 50 mM in DMA, 100 nmol) and H<sub>2</sub>O (10  $\mu$ L). Then the resulting mixture was vortexed and stood at 25 °C for 0.5 h.

**On-DNA Suzuki-Miyaura Coupling:** After the aryl diazonium intermediate was generated according to the above method, Pd(OAc)<sub>2</sub> (2  $\mu$ L, 20 mM in DMA, 40 nmol) and boronic acid (2  $\mu$ L, 500 mM in DMA, 1000 nmol) were added. The mixture was vortexed and finally supplemented with Cs<sub>2</sub>CO<sub>3</sub> (2  $\mu$ L, 800 mM in H<sub>2</sub>O, 1600 nmol) and 4  $\mu$ L H<sub>2</sub>O, and allowed for reaction at 40 °C for 2 h. After reaction, 30 equiv. of sodium diethyldithiocarbamic acid compared with Pd(OAc)<sub>2</sub> were added to the mixture to scavenge Pd, and the reaction mixture was stood at 25 °C for 30 minutes. The mixture was centrifuged at 25 °C for 10 min at 13,500 rpm, and the resultant supernatant was collected. The product was obtained by ethanol precipitation as described above and characterized by UPLC-MS. All the DNA-aniline conjugates and boronic acids in substrate scope study were performed using the method above. During the reaction, attention must be paid to: the sequence of adding reagents should not be reversed.

## 4.2 General methods for on-DNA Heck reaction

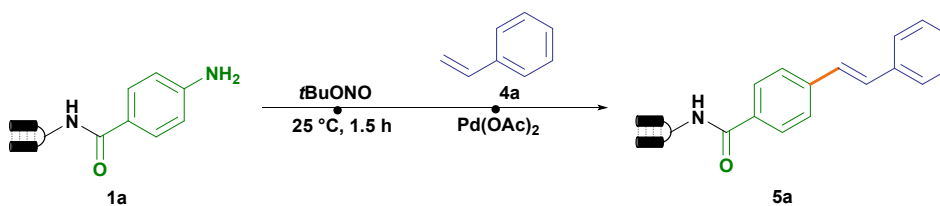

**On-DNA aryl diazonium salt formation:** To the DNA conjugate **1a** (8  $\mu$ L, 25  $\mu$ M in H<sub>2</sub>O, 0.2 nmol) was added with *t*BuONO (2  $\mu$ L, 50 mM in DMA, 100 nmol) and H<sub>2</sub>O (10  $\mu$ L). Then the resulting mixture was vortexed and stood at 25 °C for 1.5 h.

**On-DNA Heck reaction:** After the aryl diazonium intermediate was generated according to the above method, Pd(OAc)<sub>2</sub> (2  $\mu$ L, 20 mM in DMA, 40 nmol) was added. The mixture was vortexed and added a mixed solution of phosphate buffer (3  $\mu$ L, 250 mM in H<sub>2</sub>O, pH 5.5, 750 nmol), H<sub>2</sub>O (3  $\mu$ L) and styrene (2  $\mu$ L, 500 mM in DMA, 1000 nmol), then stood for reaction at 25 °C for 30 min. After reaction, 30 equiv. of sodium diethyldithiocarbamic acid (compared with Pd(OAc)<sub>2</sub>) was added to the mixture, and the reaction mixture was stood at 25 °C for 30 minutes. The mixture was centrifuged at 25 °C for 10 min at 13,500 rpm, and the resultant supernatant was collected. The product was obtained by ethanol precipitation as described above and characterized by UPLC-MS. All the DNA-aniline conjugates and olefins were performed using the method above. During the reaction, attention must be paid to: the sequence of adding reagents should not be reversed.

### 4.3 General methods for on-DNA Hiyama reaction

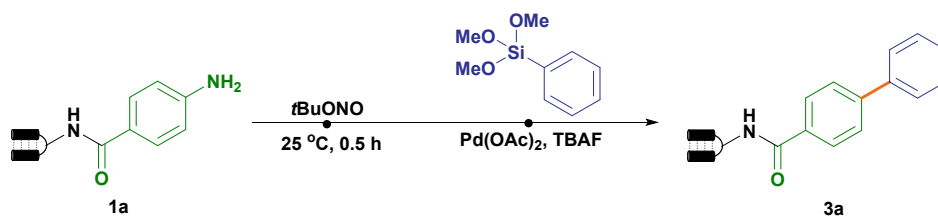

**On-DNA aryl diazonium salt formation:** To the DNA conjugate **1a** (8  $\mu$ L, 25  $\mu$ M in H<sub>2</sub>O, 0.2 nmol) was added *t*BuONO (2  $\mu$ L, 50 mM in DMA, 100 nmol) and H<sub>2</sub>O (10  $\mu$ L). Then the resulting mixture was vortexed and stood at 25 °C for 0.5 h.

**On-DNA Hiyama Coupling:** After the aryl diazonium intermediate was generated according to the above method, Pd(OAc)<sub>2</sub> (2  $\mu$ L, 20 mM in DMA, 40 nmol) was added. The mixture was vortexed and added a mixed solution of phosphate buffer (6  $\mu$ L, 250 mM in H<sub>2</sub>O, pH 5.5, 1500 nmol), phenyltrimethoxysilane (2  $\mu$ L, 500 mM in DMA, 1000 nmol) were added. The mixture was vortexed and finally supplemented with TBAF (2  $\mu$ L, 50 mM in H<sub>2</sub>O, 100 nmol), H<sub>2</sub>O to 100  $\mu$ L, and allowed for reaction at 40 °C for 1 h. After reaction, 30 equiv. of sodium diethyldithiocarbamic acid compared with Pd(OAc)<sub>2</sub> were added to the mixture to scavenge Pd, and the reaction mixture was stood at 25 °C for 30 minutes. The mixture was centrifuged at 25 °C for 10 min at 13,500 rpm, and the resultant supernatant was collected. The product was obtained by ethanol precipitation as described above and characterized by UPLC-MS. All the DNA-aniline conjugates and boronic acids in substrate scope study were performed using the method above. During the reaction, attention must be paid to: the sequence of adding reagents should not be reversed.

#### 4.4 Optimization of the model reaction

**Supplementary Table 2. Optimization of Suzuki-Miyaura coupling**

| Entry     | Catalyst                              | Base                                | Temperature (°C) | Conversion (%) |
|-----------|---------------------------------------|-------------------------------------|------------------|----------------|
| 1         | Pd(OAc) <sub>2</sub>                  | ——                                  | 25               | 60             |
| 2         | Pd(OAc) <sub>2</sub>                  | NaOH                                | 25               | 64             |
| 3         | Pd(OAc) <sub>2</sub>                  | CsOH                                | 25               | 59             |
| 4         | Pd(OAc) <sub>2</sub>                  | Cs <sub>2</sub> CO <sub>3</sub>     | 25               | 68             |
| 5         | Pd(OAc) <sub>2</sub>                  | Et <sub>3</sub> N                   | 25               | 62             |
| 6         | Pd(OAc) <sub>2</sub>                  | NaOAc                               | 25               | 60             |
| 7         | Pd(OAc) <sub>2</sub>                  | DIPEA                               | 25               | 46             |
| 8         | Pd(OAc) <sub>2</sub>                  | Cs <sub>2</sub> CO <sub>3</sub>     | 25               | 68             |
| 9         | PdCl <sub>2</sub>                     | Cs <sub>2</sub> CO <sub>3</sub>     | 25               | 54             |
| 10        | PdCl <sub>2</sub> (COD)               | Cs <sub>2</sub> CO <sub>3</sub>     | 25               | <10            |
| 11        | PdCl <sub>2</sub> (MeCN) <sub>2</sub> | Cs <sub>2</sub> CO <sub>3</sub>     | 25               | 57             |
| 12        | sPhos-Pd-G2                           | Cs <sub>2</sub> CO <sub>3</sub>     | 25               | <10            |
| 13        | Pd(CF <sub>3</sub> COO) <sub>2</sub>  | Cs <sub>2</sub> CO <sub>3</sub>     | 25               | 65             |
| <b>14</b> | <b>Pd(OAc)<sub>2</sub></b>            | <b>Cs<sub>2</sub>CO<sub>3</sub></b> | <b>40</b>        | <b>73</b>      |
| 15        | Pd(OAc) <sub>2</sub>                  | Cs <sub>2</sub> CO <sub>3</sub>     | 60               | 68             |
| 16        | Pd(OAc) <sub>2</sub>                  | Cs <sub>2</sub> CO <sub>3</sub>     | 80               | 67             |

**Standard reaction conditions:** After the aryl diazonium intermediate was generated according to the above method, Pd(OAc)<sub>2</sub> (2 μL, 20 mM in DMA, 40 nmol) and boronic acid (2 μL, 500 mM in DMA, 1000 nmol) were added. The mixture was vortexed and finally added base solution (2 μL, 800 mM in H<sub>2</sub>O, 1600 nmol), 4 μL H<sub>2</sub>O, and let for reaction at indicated temperature for 2 h. After reaction, 30 equiv. of sodium diethyldithiocarbamic acid (compared with Pd(OAc)<sub>2</sub>) were added to the mixture to scavenge Pd, and the reaction mixture was stood at 25 °C for 30 minutes. The mixture was centrifuged at 25 °C for 10 min at 13,500 rpm, and the resultant supernatant was collected. The product was obtained by ethanol precipitation as described above and characterized by UPLC-MS.



## 4.5 Structure validation of on-DNA synthesized products

### 4.5.1 Validation of on-DNA Suzuki-Miyaura coupling product **3a** by co-injection assay

Route A

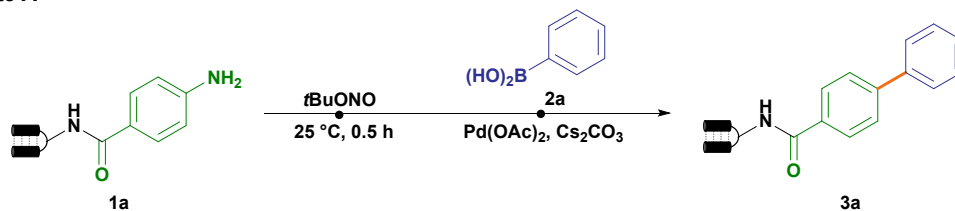

Route B

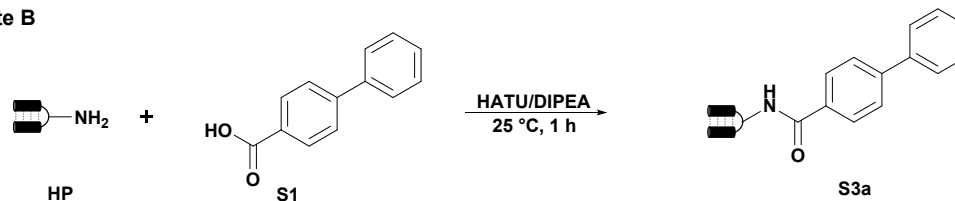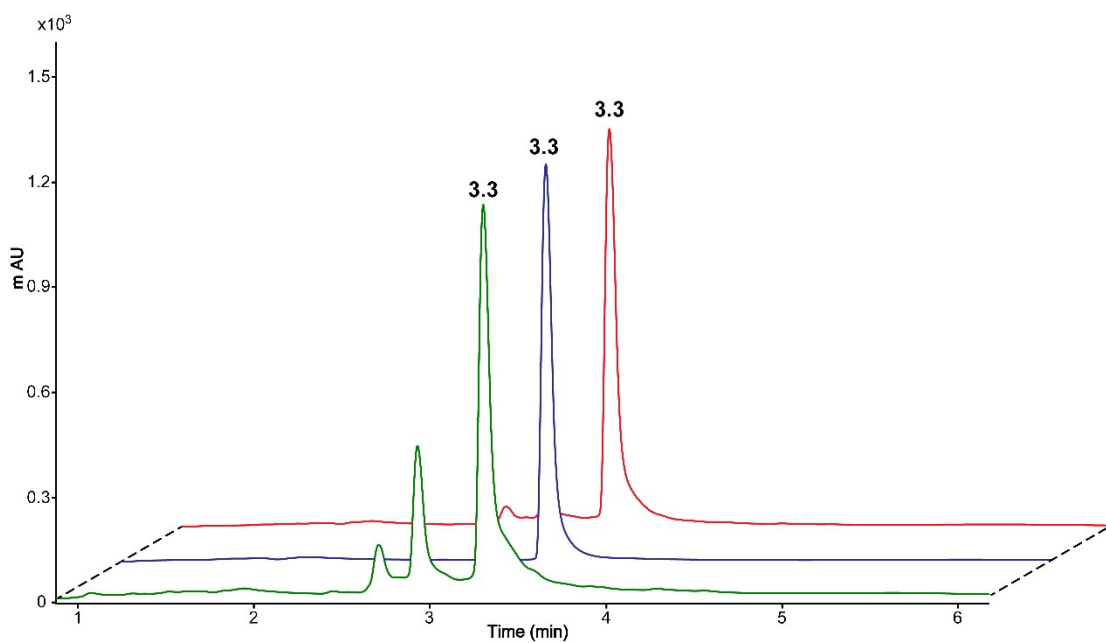

**Supplementary Fig. 5** The co-injection experiment of **3a** and **S3a** by UPLC-MS.

The “red” curve is the co-injection sample mixing **3a** and **S3a**; The “green” curve is **3a**; The “blue” curve is **S3a**.

The on-DNA synthesized **3a** sample was co-eluted with the off-DNA synthesized and characterized **S3a** sample, indicating their structures were identical.

#### 4.5.2 Off-DNA synthesis of authentic S5a

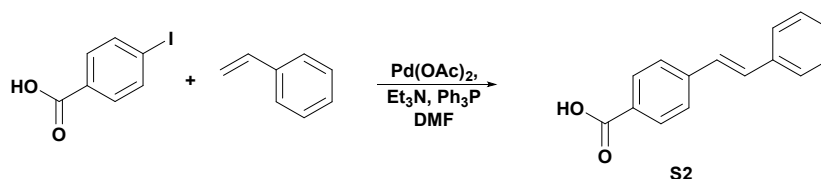

**4-stilbene carboxylic acid (S2).** Styrene (135 mg, 1.3 mmol) and 4-iodobenzoic acid (248 mg, 1 mmol) were dissolved in *N,N*-dimethylformamide (DMF, 2 mL) and triethylamine (2 mL). The solution was refluxed in the presence of triphenylphosphine (9.38 mg, 0.0358 mmol) and palladium (II) acetate (6.85 mg, 0.0305 mmol) for 24 h. After the removal of the solvent, ethyl acetate (20 mL) was added, and the soluble part was washed with three portions of H<sub>2</sub>O (6 mL). The organic layer was reprecipitated in hexane (20 mL) to give 4-stilbene carboxylic acid (pale brown powder, 87 mg, 38.8%). <sup>1</sup>H NMR (400 MHz, DMSO-*d*<sub>6</sub>) δ 12.94 (s, 1H), 7.94 (d, *J* = 8.3 Hz, 2H), 7.72 (d, *J* = 8.3 Hz, 3H), 7.64 (d, *J* = 7.4 Hz, 3H), 7.45 – 7.27 (m, 7H). <sup>13</sup>C NMR (101 MHz, DMSO-*d*<sub>6</sub>) δ 167.12 (s), 141.44 (s), 136.64 (s), 130.99 (s), 129.81 (s), 129.48 (s), 128.82 (s), 128.24 (s), 127.41 (s), 126.85 (s), 126.51 (s).<sup>2</sup>

#### <sup>1</sup>H-NMR of S2

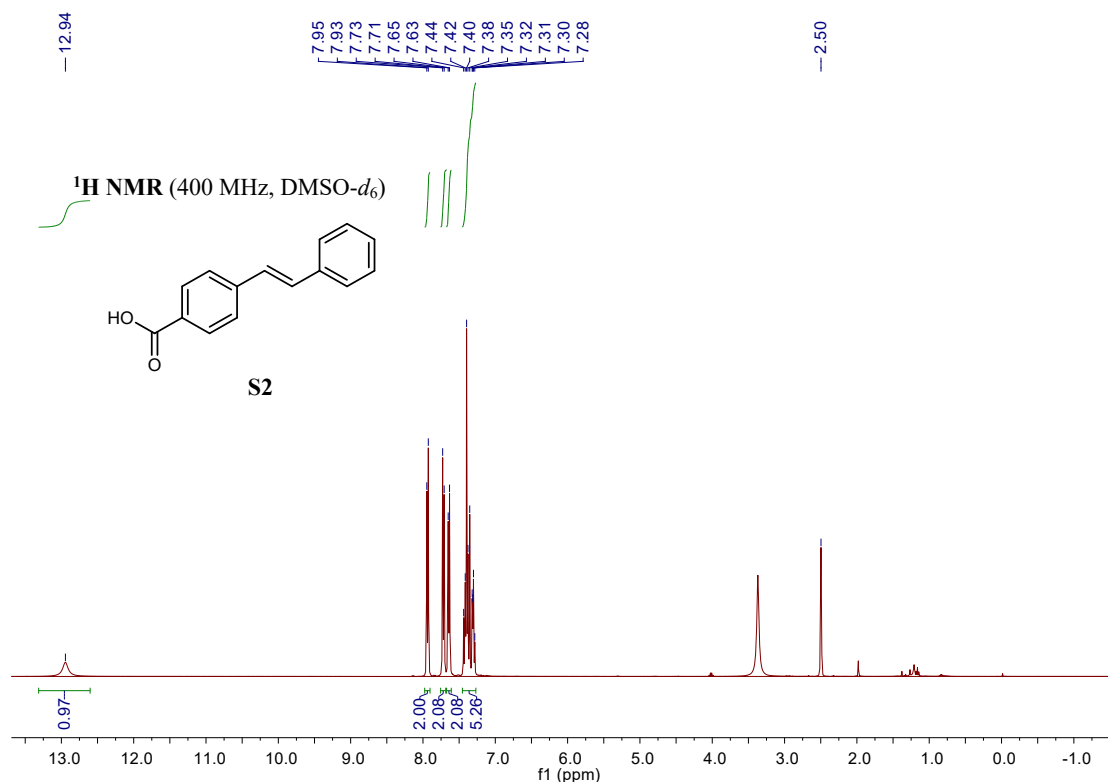

<sup>13</sup>C-NMR of S2

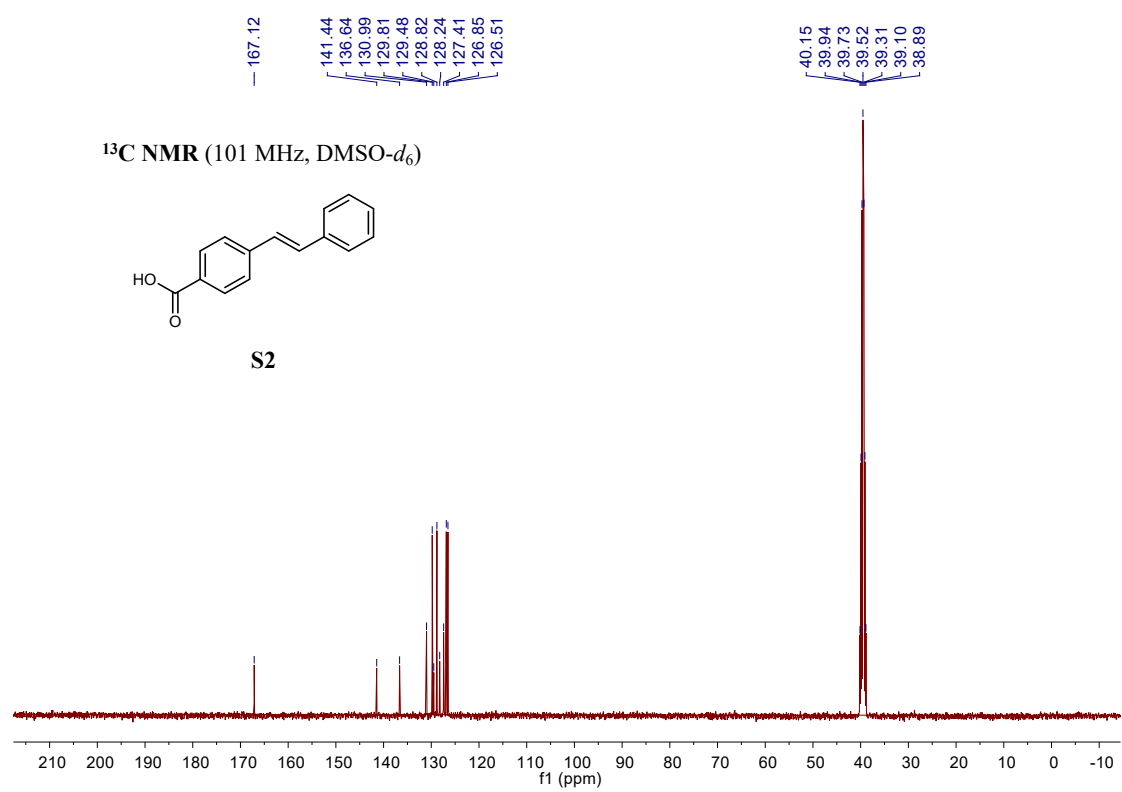

### 4.5.3 Validation of on-DNA Heck coupling product **5a** by co-injection assay

#### Route A

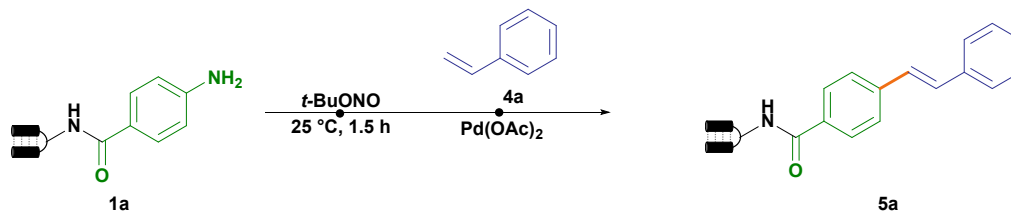

#### Route B

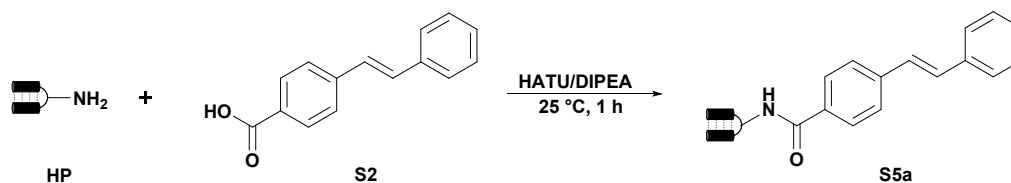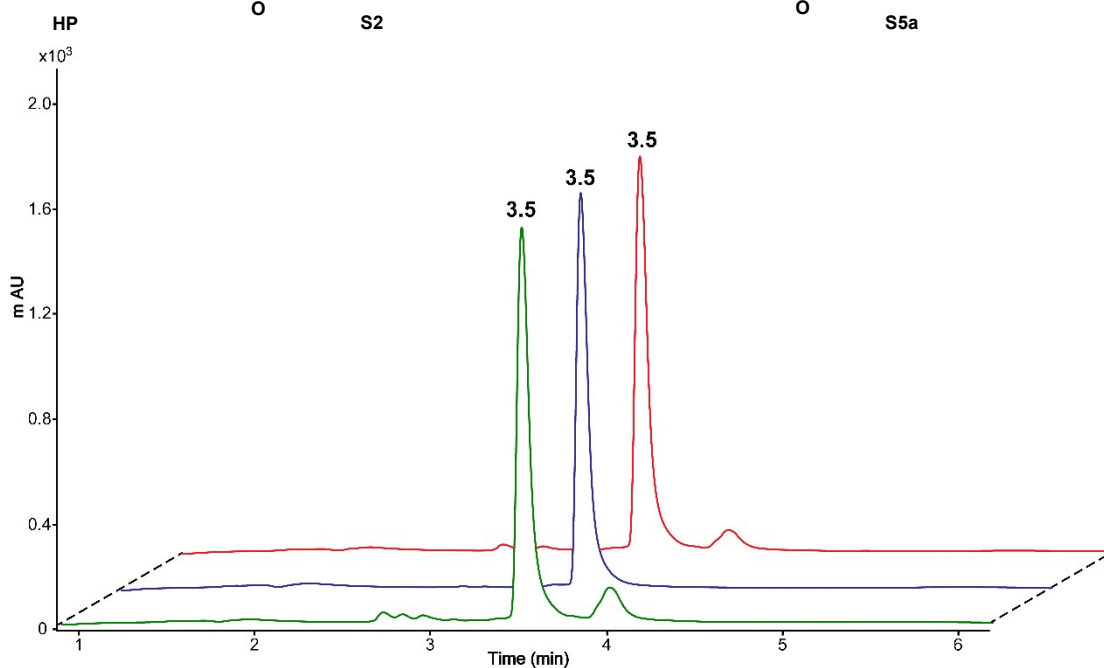

**Supplementary Fig. 6 The co-injection experiment of **5a** and **S5a** by UPLC-MS.**

The “red” curve is the co-injection sample mixing **5a** and **S5a**; The “green” curve is **5a**; The “blue” curve is **S5a**.

The on-DNA synthesized **5a** sample was co-eluted with the off-DNA synthesized and characterized **S5a** sample, indicating their structures were identical.

#### 4.5.4 Validation of On-DNA Hiyama coupling product 10a by co-injection assay

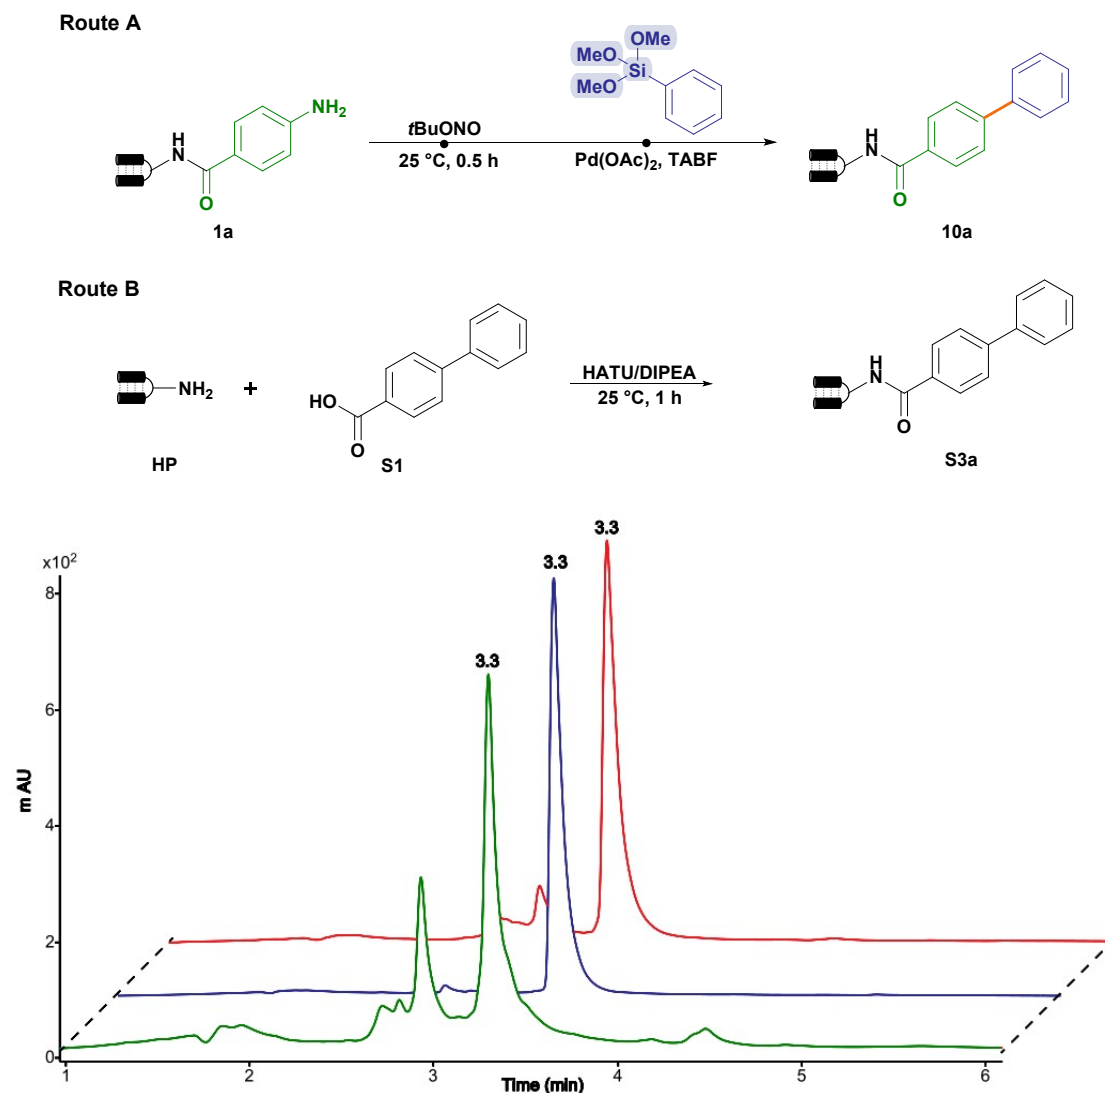

**Supplementary Fig. 7 The co-injection experiment of 10a and S3a by UPLC-MS.** The “red” curve is the co-injection sample mixing **10a** and **S3a**; The “green” curve is **10a**; The “blue” curve is **S3a**.

The on-DNA synthesized **10a** sample was co-eluted with the off-DNA synthesized and characterized **S3a** sample, indicating their structures were identical.

## 5. Substrate scopes of on-DNA Suzuki-Miyaura, Heck reaction and Hiyama reaction

### 5.1 Substrate scope of boronic acids for the on-DNA Suzuki-Miyaura coupling

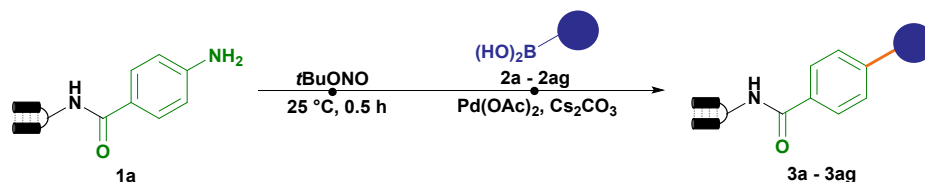

Supplementary Table 3. Substrate scope of boronic acids

| compound | structure | product | calculated mass [Da] | found mass [Da] | conversion [%] |
|----------|-----------|---------|----------------------|-----------------|----------------|
| 2a       |           | 3a      | 5117                 | 5117            | 73             |
| 2b       |           | 3b      | 5131                 | 5131            | 62             |
| 2c       |           | 3c      | 5147                 | 5147            | 77             |
| 2d       |           | 3d      | 5173                 | 5173            | 63             |
| 2e       |           | 3e      | 5135                 | 5135            | 91             |
| 2f       |           | 3f      | 5161                 | 5161            | 65             |
| 2g       |           | 3g      | 5195                 | 5195            | 75             |
| 2h       |           | 3h      | 5131                 | 5131            | 70             |
| 2i       |           | 3i      | 5131                 | 5131            | 68             |
| 2j       |           | 3j      | 5188                 | 5188            | 82             |
| 2k       |           | 3k      | 5175                 | 5175            | 78             |

|            |                                                                                     |            |      |      |    |
|------------|-------------------------------------------------------------------------------------|------------|------|------|----|
| <b>2l</b>  | 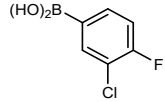   | <b>3l</b>  | 5169 | 5169 | 63 |
| <b>2m</b>  |    | <b>3m</b>  | 5165 | 5165 | 85 |
| <b>2n</b>  |    | <b>3n</b>  | 5167 | 5167 | 83 |
| <b>2o</b>  |    | <b>3o</b>  | 5161 | 5161 | 85 |
| <b>2p</b>  |    | <b>3p</b>  | 5207 | 5207 | 80 |
| <b>2q</b>  |    | <b>3q</b>  | 5157 | 5157 | 82 |
| <b>2r</b>  |    | <b>3r</b>  | 5123 | 5123 | 77 |
| <b>2s</b>  |   | <b>3s</b>  | 5173 | 5173 | 60 |
| <b>2t</b>  |  | <b>3t</b>  | 5223 | 5223 | 78 |
| <b>2u</b>  |  | <b>3u</b>  | 5117 | 5117 | 83 |
| <b>2v</b>  |  | <b>3v</b>  | 5117 | 5117 | 70 |
| <b>2w</b>  |  | <b>3w</b>  | 5167 | 5167 | 83 |
| <b>2x</b>  |  | <b>3x</b>  | 5163 | 5163 | 50 |
| <b>2y</b>  |  | <b>3y</b>  | 5135 | 5135 | 79 |
| <b>2z</b>  |  | <b>3z</b>  | 5135 | 5135 | 66 |
| <b>2aa</b> |  | <b>3aa</b> | 5153 | 5153 | 86 |

|            |                                                                                   |            |      |      |    |
|------------|-----------------------------------------------------------------------------------|------------|------|------|----|
| <b>2ab</b> | 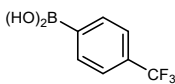 | <b>3ab</b> | 5185 | 5185 | 80 |
| <b>2ac</b> |  | <b>3ac</b> | 5162 | 5162 | 59 |
| <b>2ad</b> |  | <b>3ad</b> | 5201 | 5201 | 65 |
| <b>2ae</b> |  | <b>3ae</b> | 5149 | 5149 | 57 |
| <b>2af</b> |  | <b>3af</b> | 5165 | 5165 | 67 |
| <b>2ag</b> |  | <b>3ag</b> | 5185 | 5185 | 75 |



## 5.2 Substrate scope of DNA-conjugated arylamines for the on-DNA Suzuki-Miyaura coupling

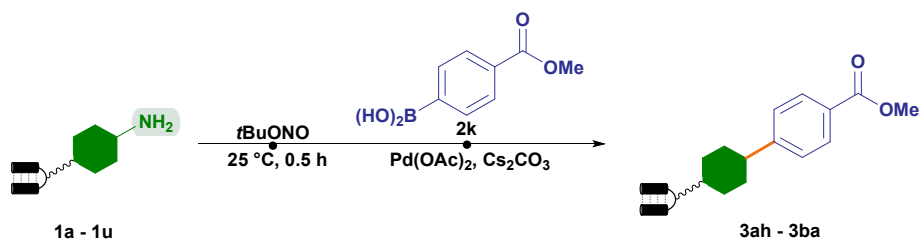

Supplementary Table 4. Substrate scope of DNA-conjugated arylamines

| compound | structure | product | calculated mass [Da] | found mass [Da] | conversion [%] |
|----------|-----------|---------|----------------------|-----------------|----------------|
| 1a       |           | 3k      | 5175                 | 5175            | 78             |
| 1b       |           | 3ah     | 5175                 | 5175            | 79             |
| 1c       |           | 3ai     | 5189                 | 5189            | 73             |
| 1d       |           | 3aj     | 5205                 | 5205            | 67             |
| 1e       |           | 3ak     | 5243                 | 5243            | 62             |
| 1f       |           | 3al     | 5205                 | 5205            | 80             |
| 1g       |           | 3am     | 5233                 | 5233            | 66             |
| 1h       |           | 3an     | 5251                 | 5251            | 70             |
| 1i       |           | 3ao     | 5225                 | 5225            | 66             |

|           |                                                                                     |            |      |                                  |    |
|-----------|-------------------------------------------------------------------------------------|------------|------|----------------------------------|----|
| <b>1j</b> | 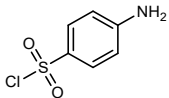   | <b>3ap</b> | 5211 | 5211                             | 67 |
| <b>1k</b> |    | <b>3aq</b> | 5193 | 5193                             | 85 |
| <b>1l</b> |    | <b>3ar</b> | 5207 | 5207                             | 72 |
| <b>1m</b> |    | <b>3as</b> | 5203 | 5203                             | 56 |
| <b>1n</b> |    | <b>3at</b> | 5207 | 5207                             | 51 |
| <b>1o</b> |    | <b>3au</b> | 5205 | 5205                             | 61 |
| <b>1p</b> |   | <b>3av</b> | 5193 | 5193                             | 65 |
| <b>1q</b> |  | <b>3aw</b> | 5207 | 5207                             | 54 |
| <b>1r</b> |  | <b>3ax</b> | 5205 | 5205                             | 67 |
| <b>1s</b> |  | <b>3ay</b> | 5193 | 5193                             | 56 |
| <b>1t</b> |  | <b>3az</b> | 5189 | 5189                             | 79 |
| <b>1u</b> |  | <b>3ba</b> | 5189 | 5189                             | 51 |
| <b>1v</b> |  | <b>3bb</b> | 5118 | 5057<br>(starting material only) | 0  |

### 5.3 Substrate scope of olefins for the on-DNA Heck reaction

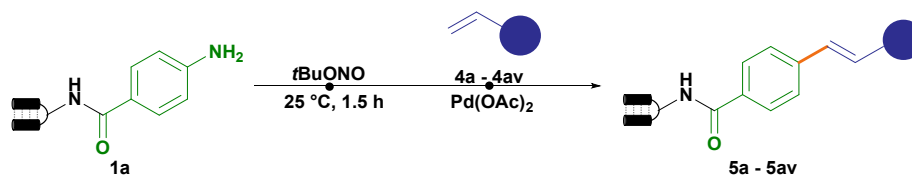

Supplementary Table 5. Substrate scope of olefins for the on-DNA Heck reaction

| compound | structure | product | calculated mass [Da] | found mass [Da] | conversion [%] |
|----------|-----------|---------|----------------------|-----------------|----------------|
| 4a       |           | 5a      | 5143                 | 5143            | 83             |
| 4b       |           | 5b      | 5157                 | 5157            | 84             |
| 4c       |           | 5c      | 5173                 | 5173            | 78             |
| 4d       |           | 5d      | 5161                 | 5161            | 83             |
| 4e       |           | 5e      | 5177                 | 5177            | 83             |
| 4f       |           | 5f      | 5222                 | 5222            | 84             |
| 4g       |           | 5g      | 5188                 | 5188            | 80             |
| 4h       |           | 5h      | 5157                 | 5157            | 91             |
| 4i       |           | 5i      | 5157                 | 5157            | 87             |
| 4j       |           | 5j      | 5222                 | 5222            | 91             |
| 4k       |           | 5k      | 5168                 | 5168            | 83             |
| 4l       |           | 5l      | 5159                 | 5159            | 63             |

|            |                                                                                     |            |      |      |    |
|------------|-------------------------------------------------------------------------------------|------------|------|------|----|
| <b>4m</b>  | 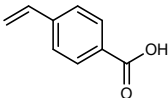   | <b>5m</b>  | 5187 | 5187 | 81 |
| <b>4n</b>  |    | <b>5n</b>  | 5171 | 5171 | 84 |
| <b>4o</b>  |    | <b>5o</b>  | 5201 | 5201 | 84 |
| <b>4p</b>  |    | <b>5p</b>  | 5201 | 5201 | 80 |
| <b>4q</b>  |    | <b>5q</b>  | 5329 | 5329 | 85 |
| <b>4r</b>  |    | <b>5r</b>  | 5125 | 5125 | 94 |
| <b>4s</b>  |   | <b>5s</b>  | 5180 | 5180 | 87 |
| <b>4t</b>  |  | <b>5t</b>  | 5180 | 5180 | 89 |
| <b>4u</b>  |  | <b>5u</b>  | 5139 | 5139 | 82 |
| <b>4v</b>  |  | <b>5v</b>  | 5139 | 5139 | 77 |
| <b>4w</b>  |  | <b>5w</b>  | 5203 | 5203 | 88 |
| <b>4x</b>  |  | <b>5x</b>  | 5149 | 5149 | 86 |
| <b>4y</b>  |  | <b>5y</b>  | 5157 | 5157 | 90 |
| <b>4z</b>  |  | <b>5z</b>  | 5139 | 5139 | 88 |
| <b>4aa</b> |  | <b>5aa</b> | 5177 | 5177 | 85 |

|            |                                                                                     |            |      |      |    |
|------------|-------------------------------------------------------------------------------------|------------|------|------|----|
| <b>4ab</b> | 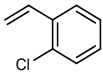   | <b>5ab</b> | 5177 | 5177 | 91 |
| <b>4ac</b> |    | <b>5ac</b> | 5222 | 5222 | 70 |
| <b>4ad</b> |    | <b>5ad</b> | 5222 | 5222 | 83 |
| <b>4ae</b> |    | <b>5ae</b> | 5199 | 5199 | 75 |
| <b>4af</b> |    | <b>5af</b> | 5110 | 5110 | 89 |
| <b>4ag</b> |    | <b>5ag</b> | 5166 | 5166 | 90 |
| <b>4ah</b> |    | <b>5ah</b> | 5152 | 5152 | 85 |
| <b>4ai</b> |   | <b>5ai</b> | 5187 | 5187 | 87 |
| <b>4aj</b> |  | <b>5aj</b> | 5186 | 5186 | 87 |
| <b>4ak</b> |  | <b>5ak</b> | 5256 | 5256 | 80 |
| <b>4al</b> |  | <b>5al</b> | 5246 | 5246 | 83 |
| <b>4am</b> |  | <b>5am</b> | 5138 | 5138 | 87 |
| <b>4an</b> |  | <b>5an</b> | 5166 | 5166 | 87 |
| <b>4ao</b> |  | <b>5ao</b> | 5169 | 5169 | 86 |
| <b>4ap</b> |  | <b>5ap</b> | 5181 | 5181 | 68 |

|            |                                                                                   |            |      |      |    |
|------------|-----------------------------------------------------------------------------------|------------|------|------|----|
| <b>4aq</b> |  | <b>5aq</b> | 5109 | 5109 | 62 |
| <b>4ar</b> |  | <b>5ar</b> | 5166 | 5166 | 82 |
| <b>4as</b> |  | <b>5as</b> | 5153 | 5153 | 58 |
| <b>4at</b> |  | <b>5at</b> | 5147 | 5147 | 84 |
| <b>4au</b> |  | <b>5au</b> | 5245 | 5245 | 82 |
| <b>4av</b> |  | <b>5av</b> | 5157 | 5157 | 78 |

## 5.4 Substrate scope of DNA-conjugated arylamines for the on-DNA Heck reaction

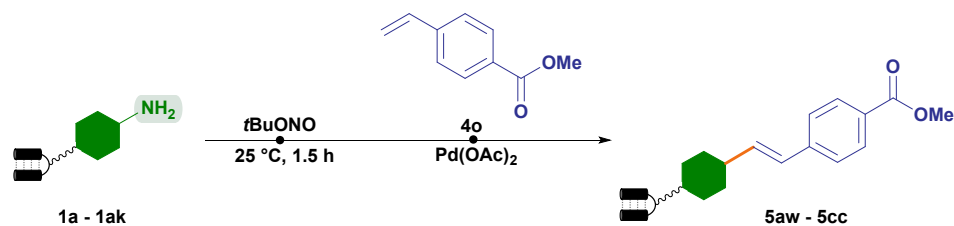

Supplementary Table 6. Substrate scope of DNA-conjugated arylamines for Heck reaction with styrene

| compound | structure | product | calculated mass [Da] | found mass [Da] | conversion [%] |
|----------|-----------|---------|----------------------|-----------------|----------------|
| 1a       |           | 5o      | 5201                 | 5201            | 86             |
| 1b       |           | 5aw     | 5201                 | 5201            | 90             |
| 1c       |           | 5ax     | 5215                 | 5215            | 77             |
| 1d       |           | 5ay     | 5231                 | 5231            | 70             |
| 1e       |           | 5az     | 5269                 | 5269            | 86             |
| 1f       |           | 5ba     | 5231                 | 5231            | 92             |
| 1g       |           | 5bb     | 5259                 | 5259            | 76             |
| 1h       |           | 5bc     | 5277                 | 5277            | 92             |

|           |  |            |      |      |    |
|-----------|--|------------|------|------|----|
| <b>1i</b> |  | <b>5bd</b> | 5251 | 5251 | 81 |
| <b>1j</b> |  | <b>5be</b> | 5237 | 5237 | 83 |
| <b>1k</b> |  | <b>5bf</b> | 5219 | 5219 | 86 |
| <b>1l</b> |  | <b>5bg</b> | 5233 | 5233 | 89 |
| <b>1m</b> |  | <b>5bh</b> | 5229 | 5229 | 96 |
| <b>1n</b> |  | <b>5bi</b> | 5233 | 5233 | 84 |
| <b>1o</b> |  | <b>5bj</b> | 5231 | 5231 | 82 |
| <b>1p</b> |  | <b>5bk</b> | 5219 | 5219 | 64 |
| <b>1q</b> |  | <b>5bl</b> | 5233 | 5233 | 84 |
| <b>1r</b> |  | <b>5bm</b> | 5231 | 5231 | 90 |
| <b>1s</b> |  | <b>5bn</b> | 5219 | 5219 | 50 |
| <b>1t</b> |  | <b>5bo</b> | 5215 | 5215 | 87 |
| <b>1u</b> |  | <b>5bp</b> | 5215 | 5215 | 84 |



|            |                                                                                     |            |      |      |    |
|------------|-------------------------------------------------------------------------------------|------------|------|------|----|
| <b>1v</b>  | 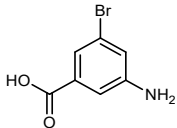   | <b>5bq</b> | 5280 | 5280 | 90 |
| <b>1w</b>  |    | <b>5br</b> | 5240 | 5240 | 82 |
| <b>1x</b>  |    | <b>5bs</b> | 5257 | 5257 | 70 |
| <b>1y</b>  |    | <b>5bt</b> | 5245 | 5245 | 73 |
| <b>1z</b>  |    | <b>5bu</b> | 5236 | 5236 | 81 |
| <b>1aa</b> |   | <b>5bv</b> | 5236 | 5236 | 84 |
| <b>1ab</b> |  | <b>5bw</b> | 5236 | 5236 | 88 |
| <b>1ac</b> |  | <b>5bx</b> | 5236 | 5236 | 82 |
| <b>1ad</b> |  | <b>5by</b> | 5215 | 5215 | 62 |
| <b>1ae</b> |  | <b>5bz</b> | 5268 | 5268 | 80 |
| <b>1af</b> |  | <b>5ca</b> | 5214 | 5214 | 81 |
| <b>1ag</b> |  | <b>5cb</b> | 5229 | 5229 | 43 |
| <b>1ah</b> |  | <b>5cc</b> | 5246 | 5246 | 67 |

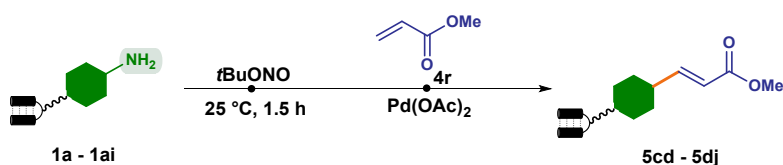

**Supplementary Table 7. Substrate scope of DNA-conjugated arylamines for Heck reaction with methyl acrylate**

| compound  | structure | product    | calculated mass [Da] | found mass [Da] | conversion [%] |
|-----------|-----------|------------|----------------------|-----------------|----------------|
| <b>1a</b> |           | <b>5r</b>  | 5125                 | 5125            | 86             |
| <b>1b</b> |           | <b>5cd</b> | 5125                 | 5125            | 84             |
| <b>1c</b> |           | <b>5ce</b> | 5139                 | 5139            | 92             |
| <b>1d</b> |           | <b>5cf</b> | 5155                 | 5155            | 80             |
| <b>1e</b> |           | <b>5cg</b> | 5193                 | 5193            | 72             |
| <b>1f</b> |           | <b>5ch</b> | 5155                 | 5155            | 92             |
| <b>1g</b> |           | <b>5ci</b> | 5183                 | 5183            | 89             |
| <b>1h</b> |           | <b>5cj</b> | 5201                 | 5201            | 95             |
| <b>1i</b> |           | <b>5ck</b> | 5175                 | 5175            | 87             |

|           |                                                                                     |            |      |      |    |
|-----------|-------------------------------------------------------------------------------------|------------|------|------|----|
| <b>1j</b> | 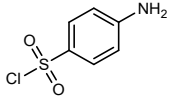   | <b>5cl</b> | 5161 | 5161 | 86 |
| <b>1k</b> |    | <b>5cm</b> | 5143 | 5143 | 86 |
| <b>1l</b> |    | <b>5cn</b> | 5157 | 5157 | 88 |
| <b>1m</b> |    | <b>5co</b> | 5153 | 5153 | 93 |
| <b>1n</b> |    | <b>5cp</b> | 5157 | 5157 | 88 |
| <b>1o</b> |    | <b>5cq</b> | 5155 | 5155 | 94 |
| <b>1p</b> |  | <b>5cr</b> | 5143 | 5143 | 75 |
| <b>1q</b> |  | <b>5cs</b> | 5157 | 5157 | 85 |
| <b>1r</b> |  | <b>5ct</b> | 5155 | 5155 | 87 |
| <b>1s</b> |  | <b>5cu</b> | 5143 | 5143 | 75 |
| <b>1t</b> |  | <b>5cv</b> | 5139 | 5139 | 92 |
| <b>1u</b> |  | <b>5cw</b> | 5139 | 5139 | 85 |
| <b>1v</b> |  | <b>5cx</b> | 5204 | 5204 | 91 |

|            |                                                                                     |            |      |      |    |
|------------|-------------------------------------------------------------------------------------|------------|------|------|----|
| <b>1w</b>  | 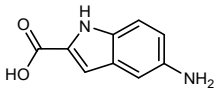   | <b>5cy</b> | 5164 | 5164 | 50 |
| <b>1x</b>  |    | <b>5cz</b> | 5181 | 5181 | 75 |
| <b>1y</b>  |    | <b>5da</b> | 5169 | 5169 | 79 |
| <b>1z</b>  |    | <b>5db</b> | 5160 | 5160 | 89 |
| <b>1aa</b> |    | <b>5dc</b> | 5160 | 5160 | 90 |
| <b>1ab</b> |   | <b>5dd</b> | 5160 | 5160 | 92 |
| <b>1ac</b> |  | <b>5de</b> | 5160 | 5160 | 90 |
| <b>1ad</b> |  | <b>5df</b> | 5139 | 5139 | 63 |
| <b>1ae</b> |  | <b>5dg</b> | 5194 | 5194 | 73 |
| <b>1af</b> |  | <b>5dh</b> | 5139 | 5139 | 92 |
| <b>1ag</b> |  | <b>5di</b> | 5153 | 5153 | 67 |
| <b>1ah</b> |  | <b>5dj</b> | 5170 | 5170 | 76 |

## 5.5 Substrate scope of arylamines for the reverse on-DNA Heck reaction

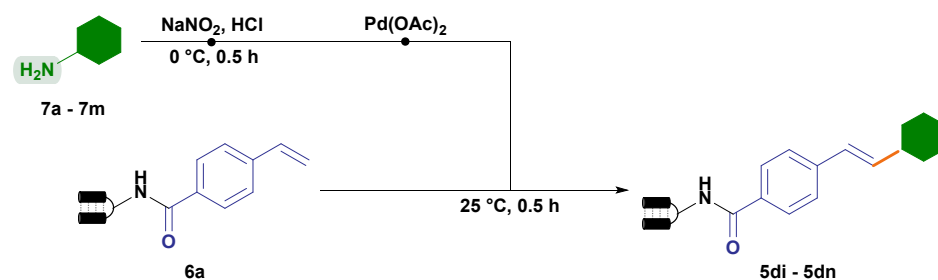

**Supplementary Table 8. Substrate scope of arylamines for the reverse on-DNA Heck reaction**

| compound | structure | product | calculated mass [Da] | found mass [Da] | conversion [%] |
|----------|-----------|---------|----------------------|-----------------|----------------|
| 7a       |           | 5a      | 5143                 | 5143            | 80             |
| 7b       |           | 5c      | 5173                 | 5173            | 77             |
| 7c       |           | 5g      | 5188                 | 5188            | 89             |
| 7d       |           | 5m      | 5187                 | 5187            | 57             |
| 7e       |           | 5k      | 5168                 | 5168            | 55             |
| 7f       |           | 5o      | 5201                 | 5201            | 85             |
| 7g       |           | 5aa     | 5177                 | 5177            | 72             |
| 7h       |           | 5di     | 5173                 | 5173            | 70             |
| 7i       |           | 5dj     | 5211                 | 5211            | 89             |
| 7j       |           | 5dk     | 5221                 | 5221            | 77             |

|           |                                                                                   |            |      |      |    |
|-----------|-----------------------------------------------------------------------------------|------------|------|------|----|
| <b>7k</b> | 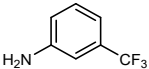 | <b>5dl</b> | 5211 | 5211 | 64 |
| <b>7l</b> |  | <b>5dm</b> | 5211 | 5211 | 68 |
| <b>7m</b> |  | <b>5dn</b> | 5161 | 5161 | 76 |

## 5.6 Substrate scope of DNA-conjugated arylamines for the on-DNA Hiyama reaction

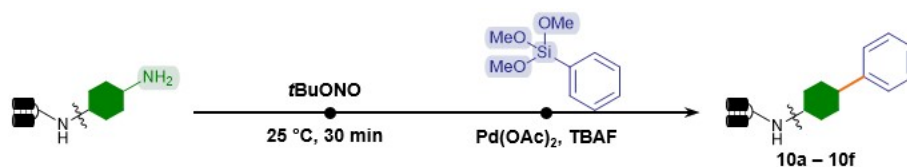

**Supplementary Table 9. Substrate scope of arylamines for the on-DNA Hiyama reaction**

| compound  | structure | product    | calculated mass [Da] | found mass [Da] | conversion [%] |
|-----------|-----------|------------|----------------------|-----------------|----------------|
| <b>1a</b> |           | <b>10a</b> | 5117                 | 5117            | 67             |
| <b>1b</b> |           | <b>10b</b> | 5117                 | 5117            | 61             |
| <b>1c</b> |           | <b>10c</b> | 5131                 | 5131            | 66             |
| <b>1l</b> |           | <b>10d</b> | 5149                 | 5149            | 63             |
| <b>1x</b> |           | <b>10e</b> | 5173                 | 5173            | 57             |
| <b>1r</b> |           | <b>10f</b> | 5147                 | 5147            | 51             |

\*Note that partial DNA damage was found in the Hiyama reaction condition. The DNA damage type was mainly depurination (-117 Da), and consist a 10-17% proportion in the desired final products. Please see the supplementary spectrum data for details.

## 5.7 Scale-up reactions

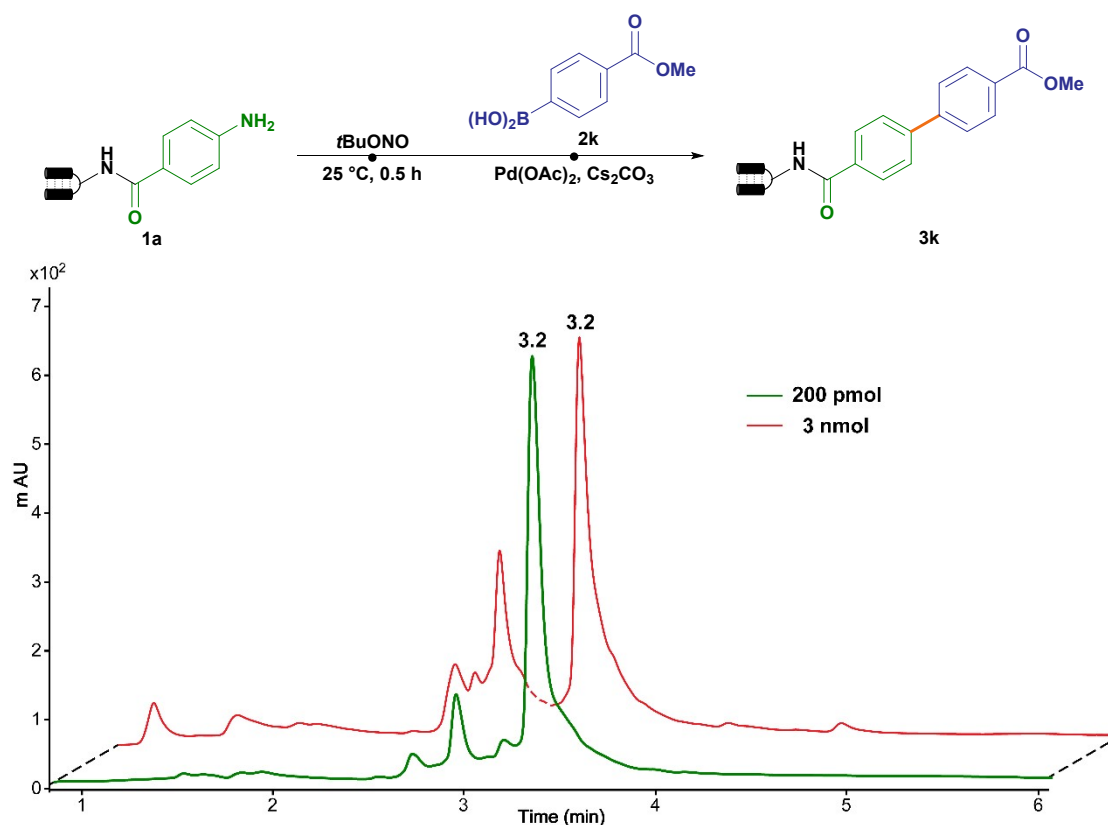

**Supplementary Fig. 8 UPLC chromatograph of 3k at 200 pmol and 3 nmol scale**

**On-DNA aryl diazonium salt formation:** To the DNA conjugate **1a** (16  $\mu\text{L}$ , 187  $\mu\text{M}$  in  $\text{H}_2\text{O}$ , 3 nmol) was added  $t\text{BuONO}$  (4  $\mu\text{L}$ , 50 mM in DMA, 200 nmol) and  $\text{H}_2\text{O}$  (20  $\mu\text{L}$ ). Then the resulting mixture was vortexed and stood at  $25\text{ }^{\circ}\text{C}$  for 0.5 h.

**On-DNA Suzuki-Miyaura Coupling:** After the aryl diazonium intermediate was generated according to the above method,  $\text{Pd}(\text{OAc})_2$  (4  $\mu\text{L}$ , 20 mM in DMA, 80 nmol) and boronic acid (4  $\mu\text{L}$ , 500 mM in DMA, 2000 nmol) were added. The mixture was vortexed and finally supplemented with  $\text{Cs}_2\text{CO}_3$  (4  $\mu\text{L}$ , 800 mM in  $\text{H}_2\text{O}$ , 3200 nmol) and 8  $\mu\text{L}$   $\text{H}_2\text{O}$ , and allowed for reaction at  $40\text{ }^{\circ}\text{C}$  for 2 h. After reaction, 30 equiv. of sodium diethyldithiocarbamic acid (compared with  $\text{Pd}(\text{OAc})_2$ ) were added to the mixture to scavenge Pd, and the reaction mixture was stood at  $25\text{ }^{\circ}\text{C}$  for 30 minutes. The mixture was centrifuged at  $25\text{ }^{\circ}\text{C}$  for 10 min at 13,500 rpm, and the resultant supernatant was collected. The product was obtained by ethanol precipitation as described above and characterized by UPLC-MS. During the reaction, attention must



be paid to: the sequence of adding reagents should not be reversed.

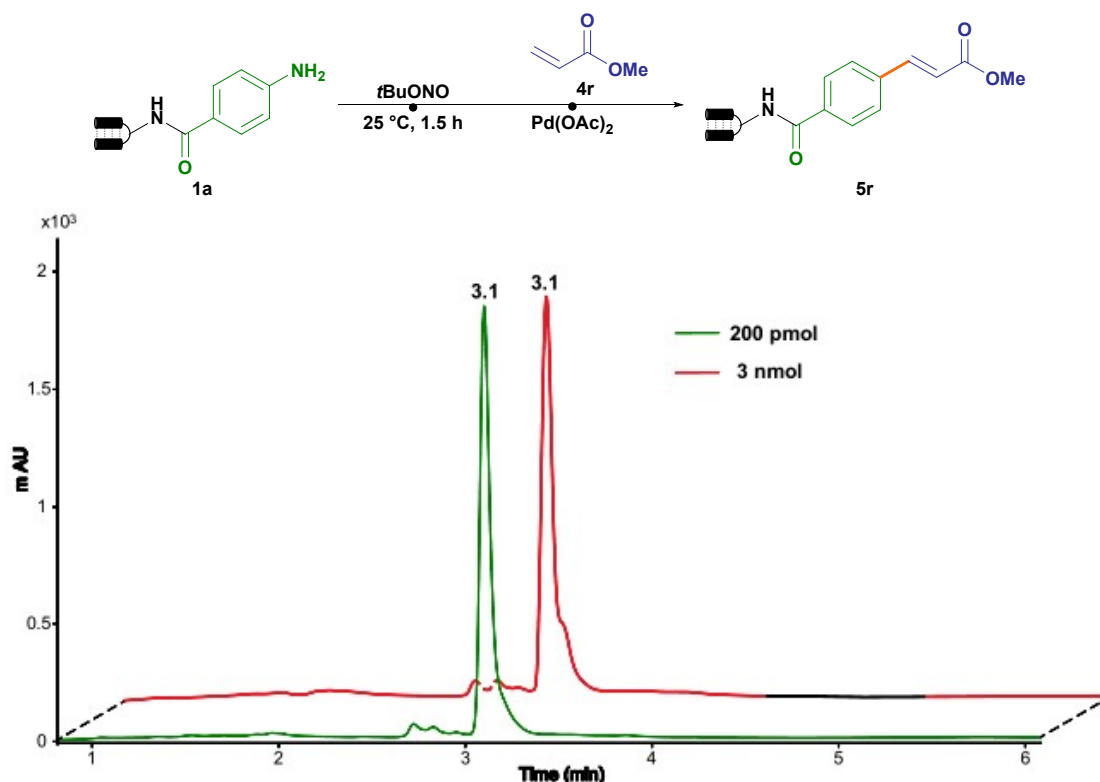

**Supplementary Fig. 9 UPLC chromatograph of 3r at 200 pmol and 3 nmol scale**

**On-DNA aryl diazonium salt formation:** To the DNA conjugate **1a** (8  $\mu\text{L}$ , 375  $\mu\text{M}$  in  $\text{H}_2\text{O}$ , 3 nmol) was added  $t\text{BuONO}$  (2  $\mu\text{L}$ , 50 mM in DMA, 100 nmol) and  $\text{H}_2\text{O}$  (10  $\mu\text{L}$ ). Then the resulting mixture was vortexed and stood at  $25\text{ }^{\circ}\text{C}$  for 1.5 h.

**On-DNA Heck reaction:** After the aryl diazonium intermediate was generated according to the above method,  $\text{Pd}(\text{OAc})_2$  (2  $\mu\text{L}$ , 20 mM in DMA, 40 nmol) were added. The mixture was vortexed and added a mixed solution of PB (3  $\mu\text{L}$ , 200 mM in  $\text{H}_2\text{O}$ , pH 5.5, 600 nmol),  $\text{H}_2\text{O}$  (3  $\mu\text{L}$ ) and styrene (2  $\mu\text{L}$ , 500 mM in DMA, 1000 nmol), and allowed for reaction at  $25\text{ }^{\circ}\text{C}$  for 30 min. After reaction, 30 equiv. of scavenger sodium diethyldithiocarbamic acid (compared with  $\text{Pd}(\text{OAc})_2$ ) was added to the mixture, and the reaction mixture was stood at  $25\text{ }^{\circ}\text{C}$  for 30 minutes. The mixture was centrifuged at  $25\text{ }^{\circ}\text{C}$  for 10 min at 13,500 rpm, and the resultant supernatant was collected. The product was obtained by ethanol precipitation as described above and characterized by UPLC-MS.

## 6. Application of on-DNA carbon-carbon bond formation in DEL construction

### 6.1 on-DNA branched molecule synthesis

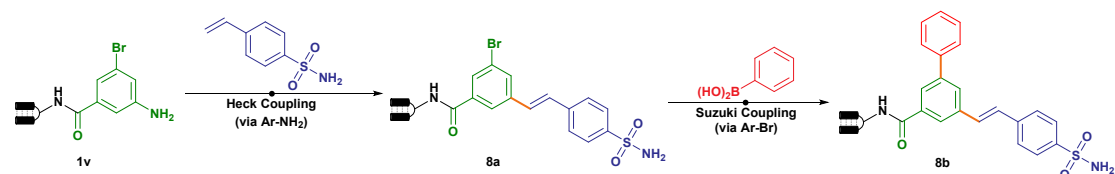

**8a:** A solution of **1f** in  $\text{H}_2\text{O}$  (8  $\mu\text{L}$ , 250  $\mu\text{M}$ , 2 nmol) was added with *t*BuONO (2  $\mu\text{L}$ , 50 mM in  $\text{H}_2\text{O}$ , 100 nmol) and  $\text{H}_2\text{O}$  (10  $\mu\text{L}$ ). Then the resulting mixture was vortexed and stood at 25  $^\circ\text{C}$  for 1.5 h.

After the aryl diazonium salt was generated according to the above method,  $\text{Pd}(\text{OAc})_2$  (2  $\mu\text{L}$ , 20 mM in DMA, 40 nmol) was added. The mixture was vortexed and added a mixed solution of PB (3  $\mu\text{L}$ , 200 mM in  $\text{H}_2\text{O}$ , pH 5.5, 600 nmol),  $\text{H}_2\text{O}$  (3  $\mu\text{L}$ ) and 4-vinylbenzenesulfonamide (2  $\mu\text{L}$ , 500 mM in DMA, 1000 nmol), and allowed for reaction at 25  $^\circ\text{C}$  for 30 min. After reaction, 30 equiv. of scavenger sodium diethyldithiocarbamic acid (compared with  $\text{Pd}(\text{OAc})_2$ ) was added to the mixture, and the reaction mixture was stood at 25  $^\circ\text{C}$  for 30 minutes. The mixture was centrifuged at 25  $^\circ\text{C}$  for 10 min at 13,500 rpm, and the resultant supernatant was collected. The product **8a** was obtained by ethanol precipitation as described above and characterized by UPLC-MS.

**8b:** To the DNA conjugate **8a** (8  $\mu\text{L}$ , 250  $\mu\text{M}$  in  $\text{H}_2\text{O}$ , 2 nmol) was added phenylboronic acid (1  $\mu\text{L}$ , 500 mM in DMA, 500 nmol) and  $\text{Cs}_2\text{CO}_3$  (1  $\mu\text{L}$ , 800 mM in  $\text{H}_2\text{O}$ , 800 nmol), then the pre-mixture of ligand ([1,1'-Biphenyl]-3-sulfonic acid, 2'-(dicyclohexylphosphino)-2,6-dimethoxy-, sodium salt, hydrate, CAS: 1049726-96-6) (2  $\mu\text{L}$ , 20 mM in  $\text{H}_2\text{O}$ , 40 nmol) and  $\text{Pd}(\text{OAc})_2$  (1  $\mu\text{L}$ , 10 mM in MeCN, 10 nmol) was added. The reaction was allowed to proceed at 80  $^\circ\text{C}$  for 3.5 h. After reaction, 30 equiv. of scavenger sodium diethyldithiocarbamic acid (compared with  $\text{Pd}(\text{OAc})_2$ ) were added to the mixture, and the reaction mixture was stood at 25  $^\circ\text{C}$  for 30 min. The mixture

was centrifuged at 25 °C for 10 min at 13,500 rpm, and the resultant supernatant was collected. The product **8b** was obtained by ethanol precipitation as described above and characterized by UPLC-MS.<sup>3</sup>

## 6.2 on-DNA linear molecule synthesis

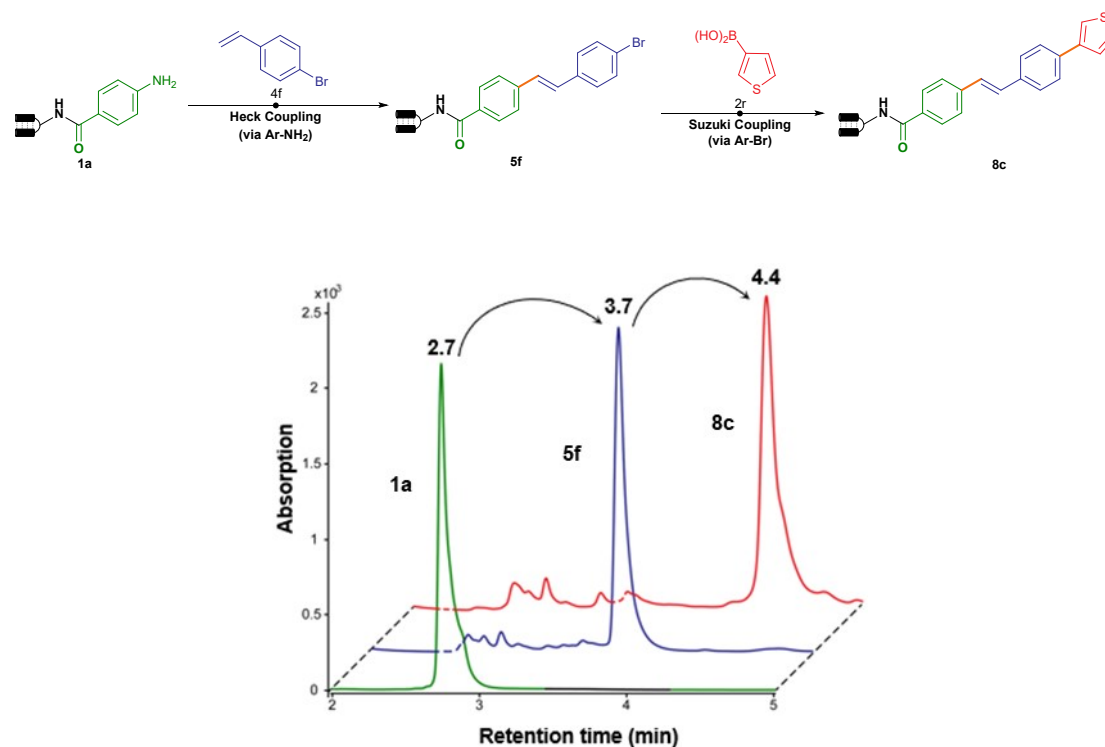

**Supplementary Fig. 10 Synthesis of on-DNA linear molecule **8c****

**5f**: To the DNA conjugate **1a** (8  $\mu$ L, 0.25 mM in H<sub>2</sub>O, 2 nmol) was added with *t*BuONO (2  $\mu$ L, 50 mM in H<sub>2</sub>O, 100 nmol) and H<sub>2</sub>O (10  $\mu$ L). Then the resulting mixture was vortexed and stood at 25 °C for 1.5 h.

After the aryl diazonium salt was generated according to the above method, Pd(OAc)<sub>2</sub> (2  $\mu$ L, 20 mM in DMA, 40 nmol) was added. The mixture was vortexed and added a mixed solution of PB (3  $\mu$ L, 200 mM in H<sub>2</sub>O, pH 5.5, 600 nmol), H<sub>2</sub>O (3  $\mu$ L) and 4-Bromostyrene (2  $\mu$ L, 500 mM in DMA, 1000 nmol), and allowed for reaction at 25 °C for 30 min. After reaction, 30 equiv. of scavenger sodium diethyldithiocarbamic acid (compared with Pd(OAc)<sub>2</sub>) was added to the mixture, and the reaction mixture was stood at 25 °C for 30 minutes. The mixture was centrifuged at 25 °C for 10 min at 13,500 rpm, and the resultant supernatant was collected. The product **5f** was obtained

by ethanol precipitation as described above and characterized by UPLC-MS.

**8c:** To the DNA conjugate **5f** (8  $\mu$ L, 250  $\mu$ M in H<sub>2</sub>O, 2 nmol) was added the boronate (1  $\mu$ L, 500 mM in DMA, 500 nmol) and Cs<sub>2</sub>CO<sub>3</sub> (1  $\mu$ L, 800 mM in H<sub>2</sub>O, 800 nmol), then the pre-mixture of ligand 1 (2  $\mu$ L, 20 mM in H<sub>2</sub>O, 40 nmol) and Pd(OAc)<sub>2</sub> (1  $\mu$ L, 10 mM in MeCN, 10 nmol) was added. The reaction was allowed to proceed at 80 °C for 3.5 h. After reaction, 30 equiv. of scavenger sodium diethyldithiocarbamic acid (compared with Pd(OAc)<sub>2</sub>) were added to the mixture, and the reaction mixture was stood at 25 °C for 30 min. The mixture was centrifuged at 25 °C for 10 min at 13,500 rpm, and the resultant supernatant was collected. The product **8c** was obtained by ethanol precipitation as described above and characterized by UPLC-MS.

## 6.2 Verification of DNA enzymatic ligation compatibility

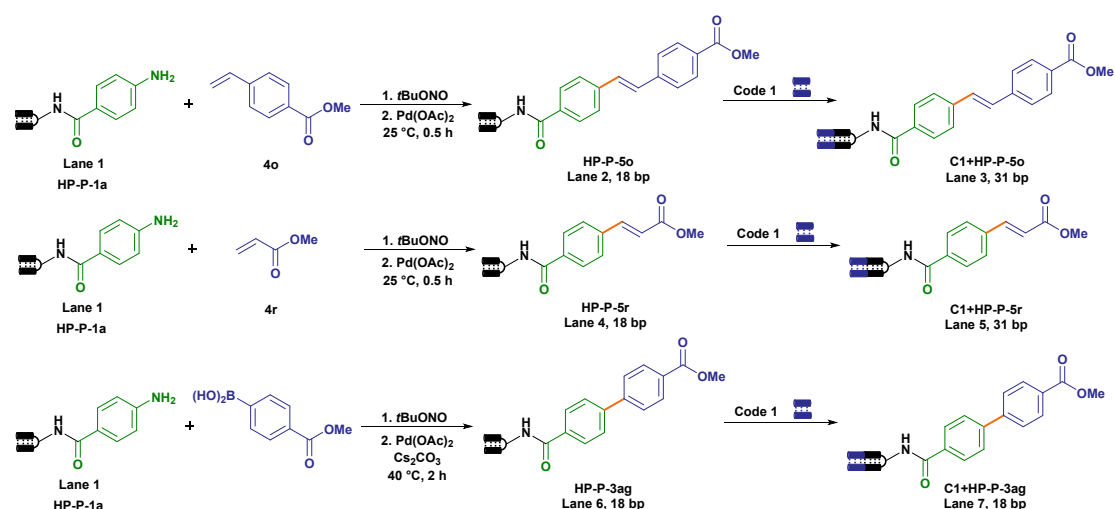

**Supplementary Fig. 11 Protocol of on-DNA C-C bond formation and subsequent enzymatic ligation.**

**HP-P-1a**, **HP-P-5o**, **HP-P-5r**, and **HP-P-3ag** were synthesized according to the above method. (See chapters 4.1 and 4.2 for details)

To the DNA conjugate **HP-P-5o**, **HP-P-5r**, or **HP-P-3ag** (5  $\mu$ L, 0.5 nmol), was added with code 1 (6  $\mu$ L, 0.6 nmol, 1.2 equiv.) and 10 $\times$  ligation buffer (2  $\mu$ L) in the 0.6 mL tube and thoroughly mixed by vortex, then T4 DNA ligase (1  $\mu$ L, 350 units/ $\mu$ L) and H<sub>2</sub>O (6  $\mu$ L) were added and mixed gently. The reaction mixture was incubated at 20 °C overnight. After ligation confirmation by UPLC-MS analysis, the reaction system

was denatured by boiling at 95 °C for 10 min, and the ligation product was isolated by ethanol precipitation. The resulting pellets were vacuum-dried and dissolved in nuclease-free water, and subjected to PAGE analysis.

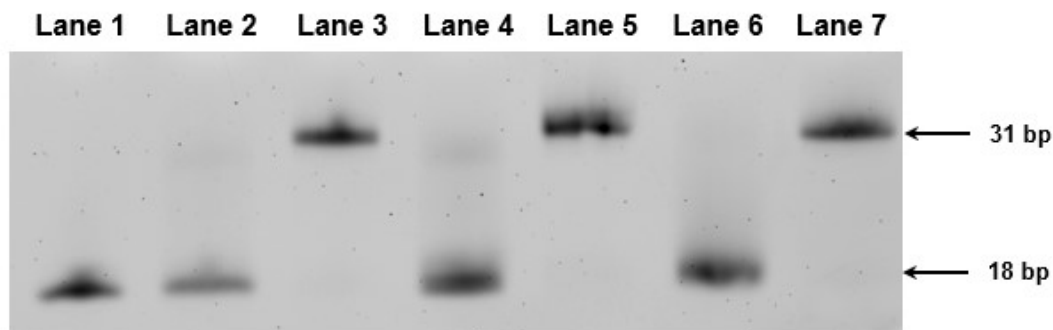

**Supplementary Fig. 12 20% denatured PAGE analysis of DEL-encoding compatibility of on-DNA C-C bond formation.**

### 6.3 Verification of PCR and sequencing compatibility of DNA barcodes

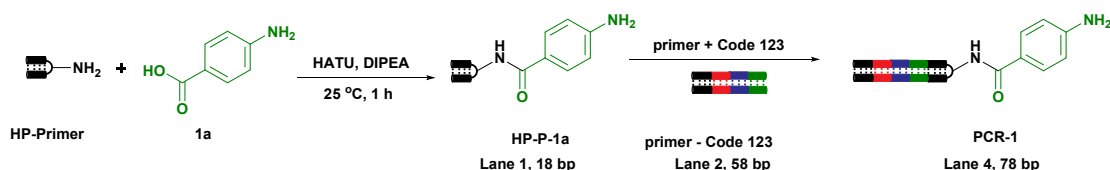

**Supplementary Fig. 13 Scheme of preparing the amplifiable PCR substrate PCR-1.**

Pre-mixed solution: 4-aminobenzoic acid (4  $\mu$ L, 200 mM in DMA), HATU (4  $\mu$ L, 200 mM in DMA), and DIPEA (4  $\mu$ L, 200 mM in DMA).

A solution of **HP-Primer** in pH 9.4 borate buffer (10  $\mu$ L, 1 mM in 250 mM sodium borate buffer) was added 6  $\mu$ L pre-mixed solution. The mixture was vortexed and reacted at room temperature for 10 min, then was added another 4  $\mu$ L of pre-mixed solution. The mixture was vortexed and reacted at room temperature for 1 h, followed by ethanol precipitation. The resulting pellet was vacuum-dried and dissolved in nuclease-free water (200  $\mu$ L). The reaction was analyzed by UPLC-MS.

DNA conjugate **HP-P-1a** (10  $\mu$ L, 500 pmol), code 123 (5  $\mu$ L, 500 pmol, 1.0 equiv.) and 10 $\times$  ligation buffer (2  $\mu$ L) were mixed in the 0.6 mL tube, then T4 DNA ligase (1  $\mu$ L, 350 units/ $\mu$ L) and H<sub>2</sub>O (2  $\mu$ L) was added and mixed gently. The reaction

mixture was vortexed, centrifuged, and incubated at 20 °C for overnight. After ligation confirmation by UPLC-MS analysis, the reaction system was denatured by boiling at 95 °C for 10 min, and the ligation product was isolated by ethanol precipitation. The resulting pellets were vacuum-dried and dissolved in nuclease-free water. The resulting enzymatic ligation product **PCR-1** was checked by PAGE analysis.

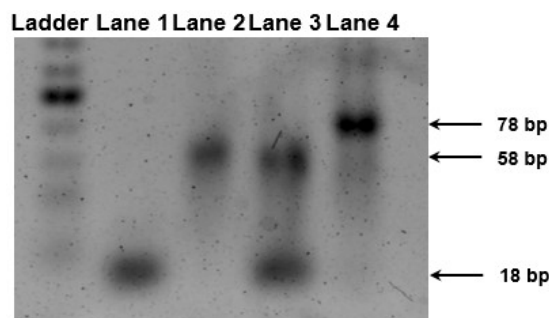

**Supplementary Fig. 14 3% Agarose gel analysis of the amplifiable PCR substrate PCR-1. Lane 1: HP-P-1a, Lane 2: Code 123-Primer, Lane 3: HP-P/Code, without T4 DNA ligase, Lane 4: HP-P/Code, with T4 DNA ligase .**

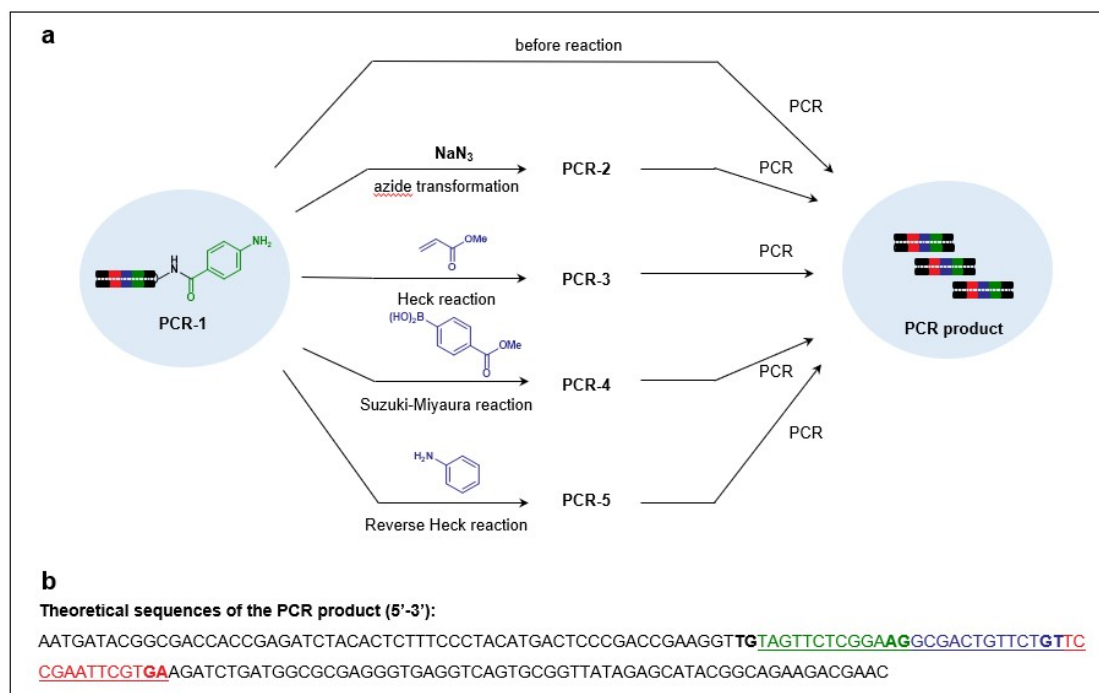

**Supplementary Fig. 15 Scheme of sample preparation for PCR and Sanger sequencing**

The **PCR-1** amplifiable DNA substrate was subjected to various chemical reactions developed in this work. As representatives, **PCR-2**, **PCR-3**, **PCR-4**, and

**PCR-5** were synthesized according to the above method. (See chapters 3.2, 4.1, 4.2 for details)

After **PCR-1**, **PCR-2**, **PCR-3**, **PCR-4**, and **PCR-5** were obtained, the samples were subjected to PCR amplification and Sanger sequencing. By comparing the sequencing results of the starting material before reaction (**PCR-1**) with the chemical reaction products (**PCR-2**, **PCR-3**, **PCR-4**, and **PCR-5**), we could reach the conclusion that the method we developed here was compatible with DNA PCR and sequencing, that is, compatible with the DEL decoding procedure.

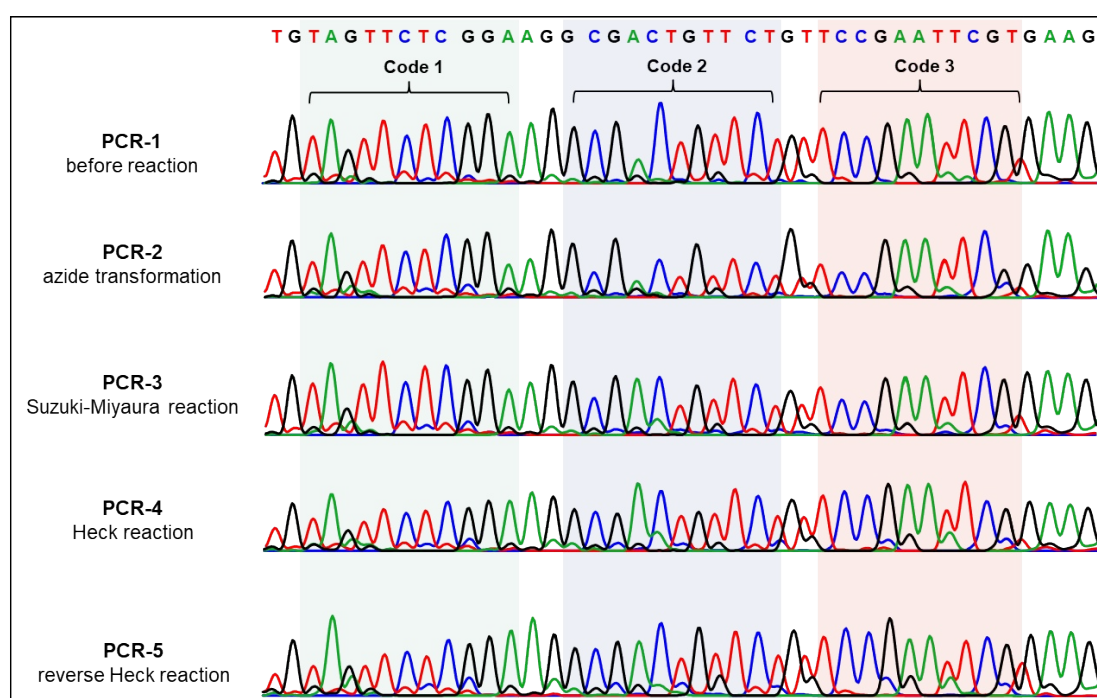

**Supplementary Fig. 16 Sanger sequencing results of samples before and after chemical reactions**

Seen from the sequencing results, the sequence of encoding regions in the four DNA sequences can be accurately decoded without mutation. In addition, the base peak noises were not significantly increased.

## 6.4 DNA Sequences

**Supplementary Table 10. DNA Sequences of ligation, PCR and sequencing**

| Name                  | Code sequence                                                                                                                                                             |
|-----------------------|---------------------------------------------------------------------------------------------------------------------------------------------------------------------------|
| Code 1                | ACGGACTAACAAG                                                                                                                                                             |
|                       | TGTTAGTCCGTCA                                                                                                                                                             |
| Code 123              | TAGTTCTCGGAAGGCGACTGTTCTGTTCCGAATTCGTGAAGATCTGATGGCGCGAGGG                                                                                                                |
|                       | CCCTCGCGCCATCAGATCTTCACGAATTCGGAACAGAACAGTCGCCTTCCGAGAACTACA                                                                                                              |
| PCR product           | AATGATACGGCGACCAACGAGATCTACACTCTTTCCCTACATGACTCCCGACCGAA<br>GGTTGTAGTTCTCGGAAGGCGACTGTTCTGTTCCGAATTCGTGAAGATCTGATGGCG<br>CGAGGGTGAGGTCAGTGCGGTTATAGAGCATA CGGCAGAAGACGAAC |
| amplification primers | Forward Primer:<br>AATGATACGGCGACCAACGAGATCTACACTCTTTCCCTACATGACTCCCGACCGAAGGT                                                                                            |
|                       | Reverse Primer:<br>CAAGCAGAAGACGGCATAACGAGATATTGGCGTGACTGGAGTC CCTCGCGCCATCAGATC                                                                                          |
| sequencing primers    | Forward Primer: CGGCGACCAACGAGATCTACACTC                                                                                                                                  |
|                       | Reverse Primer: AAGACGGCATAACGAGATATTGGCG                                                                                                                                 |

All the DNA sequences were written in 5'-to 3'-orientation unless otherwise noted.



## 7. Application of on-DNA carbon-carbon bond formation in DNA-encoded pharmaceutical compound and chemical probe synthesis

### 7.1 Comparative study of on-DNA functional group synthesis

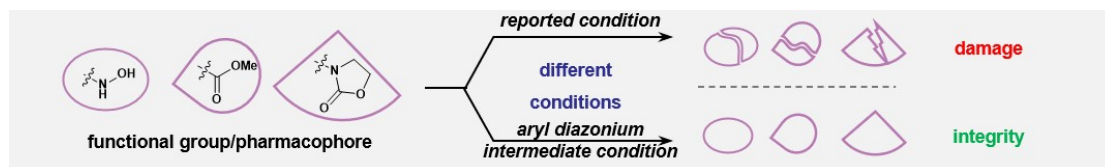

**Supplementary Fig. 17 on-DNA bioactive compound synthesis**

**Reported condition:** To the DNA conjugate aryl iodide (5  $\mu$ L, 1 mM in H<sub>2</sub>O, 5 nmol,) were added 5  $\mu$ L DMA, 500 equiv of styrene (5  $\mu$ L, 500 mM in DMA, 2500 nmol), 2 equiv of PdCl<sub>2</sub> (COD) (1  $\mu$ L, 10 mM in DMA, 10 nmol) and 500 equiv of K<sub>2</sub>CO<sub>3</sub> (5  $\mu$ L, 500 mM in H<sub>2</sub>O, 2500 nmol). The mixture was vortexed. The reaction was proceeded at 80 °C for 6 h. Next, 5 M NaCl solution (10 % by volume) and cold ethanol (2.5 times by volume, ethanol stored at -20 °C) was added. The mixture was stored at a -80 °C freezer for more than 30 minutes. Then the sample was centrifuged for 30 min at 4 °C in a microcentrifuge at 10000 rpm. The above supernatant was removed and the pellet (precipitate) was cooled in liquid nitrogen and then placed on a lyophilizer. After lyophilization, the dry pellet was recovered.<sup>4</sup>

**Aryl diazonium intermediate condition: On-DNA aryl diazonium salt formation:** To the DNA conjugate **1a** (8  $\mu$ L, 25  $\mu$ M in H<sub>2</sub>O, 0.2 nmol) was added with *t*BuONO (2  $\mu$ L, 50 mM in DMA, 100 nmol) and H<sub>2</sub>O (10  $\mu$ L). Then the resulting mixture was vortexed and stood at 25 °C for 1.5 h.

**On-DNA Heck reaction:** After the aryl diazonium intermediate was generated according to the above method, Pd(OAc)<sub>2</sub> (2  $\mu$ L, 20 mM in DMA) was added. The mixture was vortexed and added a mixed solution of phosphate buffer (3  $\mu$ L, 250 mM in H<sub>2</sub>O, pH 5.5), H<sub>2</sub>O (3  $\mu$ L) and styrene (2  $\mu$ L, 500 mM in DMA), then stood for reaction at 25 °C for 30 min. After reaction, 30 equiv. of sodium diethyldithiocarbamic acid (compared with Pd(OAc)<sub>2</sub>) was added to the mixture, and the reaction mixture was stood at 25 °C for 30 minutes. The mixture was centrifuged at 25 °C for 10 min at 13,500 rpm, and the resultant supernatant was collected. The product was obtained by



## b Ester hydrolysis

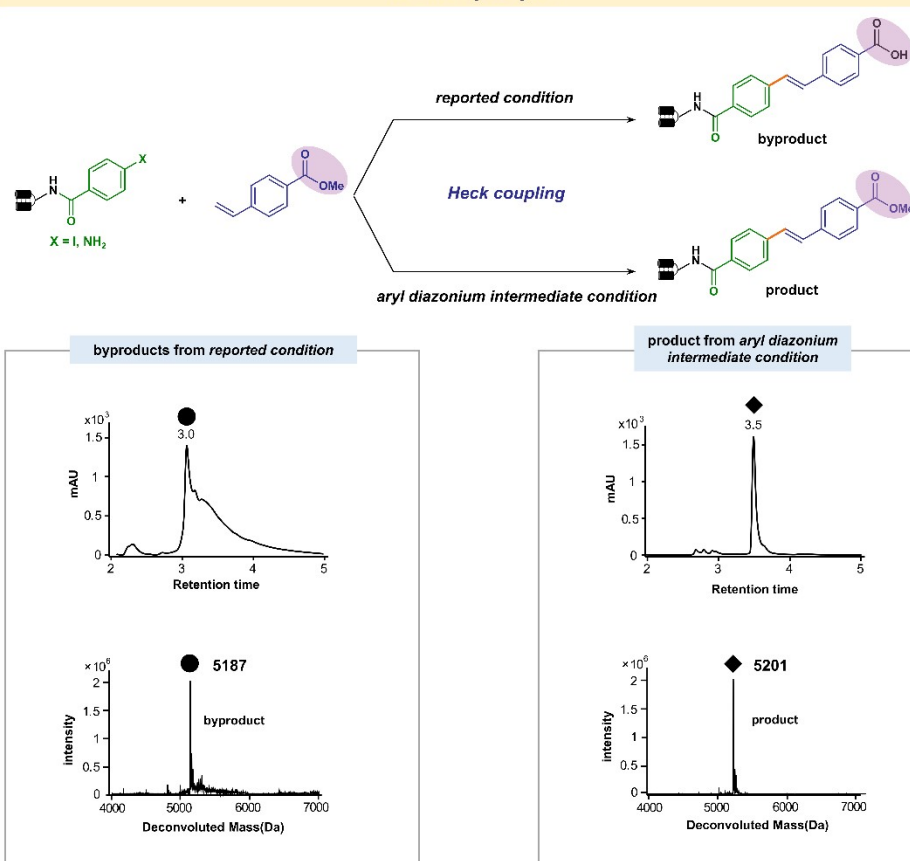

**Supplementary Fig. 19** The effects of two different Heck reactions on the ester group. Calculated Mass: 5201 Da; Found Mass: 5187 Da (byproduct), 5201 Da (product).

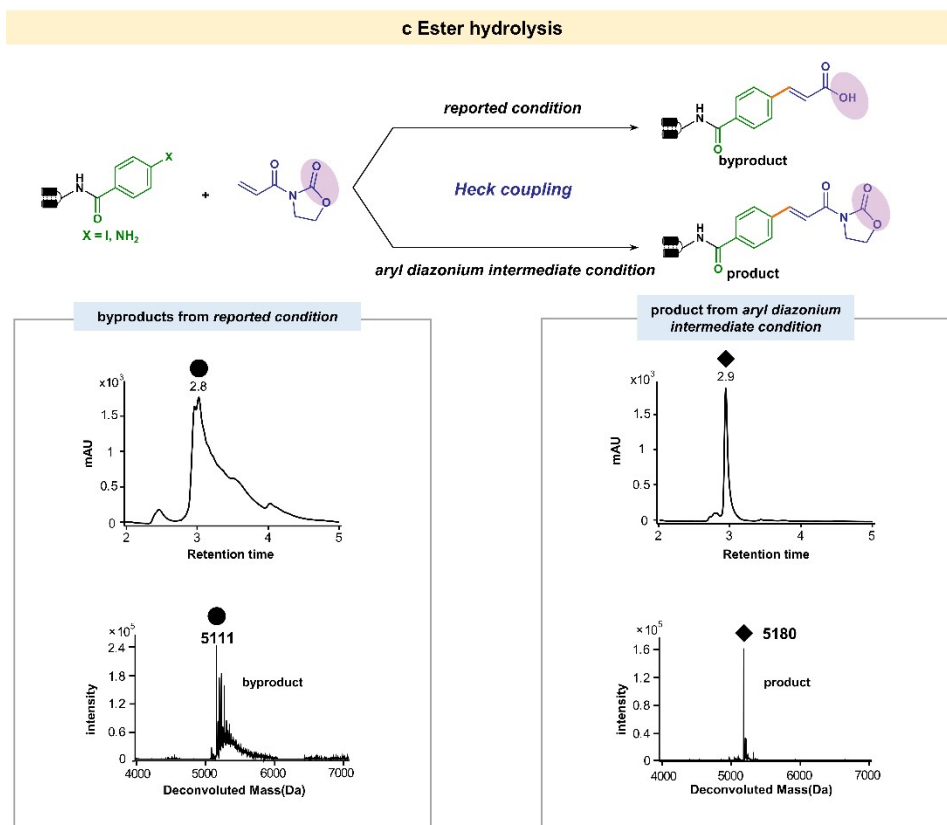

**Supplementary Fig. 20** The effects of two different Heck reactions on the oxazolidone. Calculated Mass: 5180 Da; Found Mass: 5111 Da (byproducts); 5180 Da (product)

Similarly, on-DNA library synthesis utilizing the previously reported method will cause the hydrolysis of the ester or oxazolidone<sup>6</sup> functional group into the carboxyl group, thus failing to obtain the target product. These data together demonstrated the mild transformation/coupling condition of the aryl diazonium-based approach was superior in aspects of substrate compatibility and functional group tolerance.

## 7.2 Comparative study of on-DNA pharmacophore (HDAC inhibitor) synthesis

### Synthesis of the SAHA derivative.

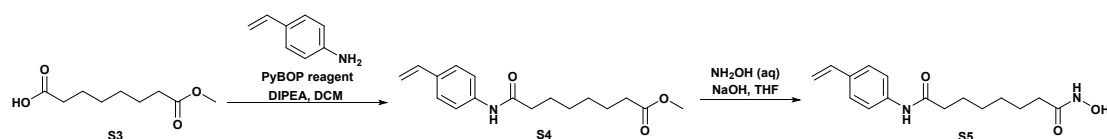

To a stirred solution of 8-methoxy-8-oxooctanoic acid (S3, 188.1 mg, 1.0 mmol) in anhydrous DCM (10 mL) were sequentially added 4-vinylaniline (119.1 mg, 1.0 mmol), PyBOP hexafluorophosphate (624.5 mg, 1.2 mmol), and DIPEA (258.6 mg, 2.0 mmol) at 0 °C. The reaction mixture was warmed to room temperature gradually, and was stirred for 4 h, the resulting solution was extracted three times with dichloromethane (3×10 mL) and the combined organic layers were dried over sodium sulfate. The dried solution was filtered and concentrated in vacuo. The residue was purified by flash column chromatography to afford the product methyl 8-oxo-8-((4-vinylphenyl)amino)-octanoate as a white solid (S4, 202.4 mg, 70%), which was used in the next step of synthesis without further characterization.

To a stirred solution of S4 (144.6 mg, 0.5 mmol) in THF (10 mL) were added freshly prepared aqueous hydroxylamine (330.0 mg, 10.0 mmol) and sodium hydroxide (40.0 mg, 1.0 mmol) in methanol (1.0 mL) at 0 °C. After stirring for 3 h at the same temperature, white precipitate was formed. The solvent was removed and the solid was added with water (3 mL) and hydrochloric acid was added drop-wisely until the solution was neutralized. The resulting solution was extracted three times with EA (3×10 mL) and the combined organic layers were washed with saturated sodium chloride solution (3×10 mL). The water layer was removed and the organic layer was then dried over sodium sulfate. The dried solution was concentrated in vacuo to afford the product as a white solid (S5, 108.8 mg, 75%).<sup>7</sup> HRMS ( $m/z$ ,  $C_{16}H_{23}N_2O_3$ , ESI): calculated  $[M+H]^+$ : 291.1703; found: 291.1700. <sup>1</sup>H NMR (400 MHz, DMSO- $d_6$ )  $\delta$  10.33 (s, 1H), 9.91 (s, 1H), 8.66 (s, 1H), 7.57 (d,  $J$  = 8.4 Hz, 2H), 7.39 (d,  $J$  = 8.4 Hz, 2H), 6.65 (dd,  $J$  = 17.6, 10.9 Hz, 1H), 5.71 (d,  $J$  = 17.7 Hz, 1H), 5.15 (d,  $J$  = 11.0 Hz, 1H), 2.28 (t,  $J$  = 7.3 Hz, 2H), 1.93 (t,  $J$  = 7.3 Hz, 2H), 1.56 (d,  $J$  = 6.8 Hz, 2H), 1.51 – 1.44 (m, 2H), 1.27 (d,  $J$

= 2.4 Hz, 4H).  $^{13}\text{C}$  NMR (101 MHz,  $\text{DMSO}-d_6$ )  $\delta$  171.70 (s), 169.59 (s), 139.16 (s), 136.38 (s), 132.23 (s), 126.77 (s), 119.31 (s), 112.95 (s), 36.60 (s), 32.47 (s), 28.59 (s), 25.26 (s).

$^1\text{H}$ -NMR of **S5**

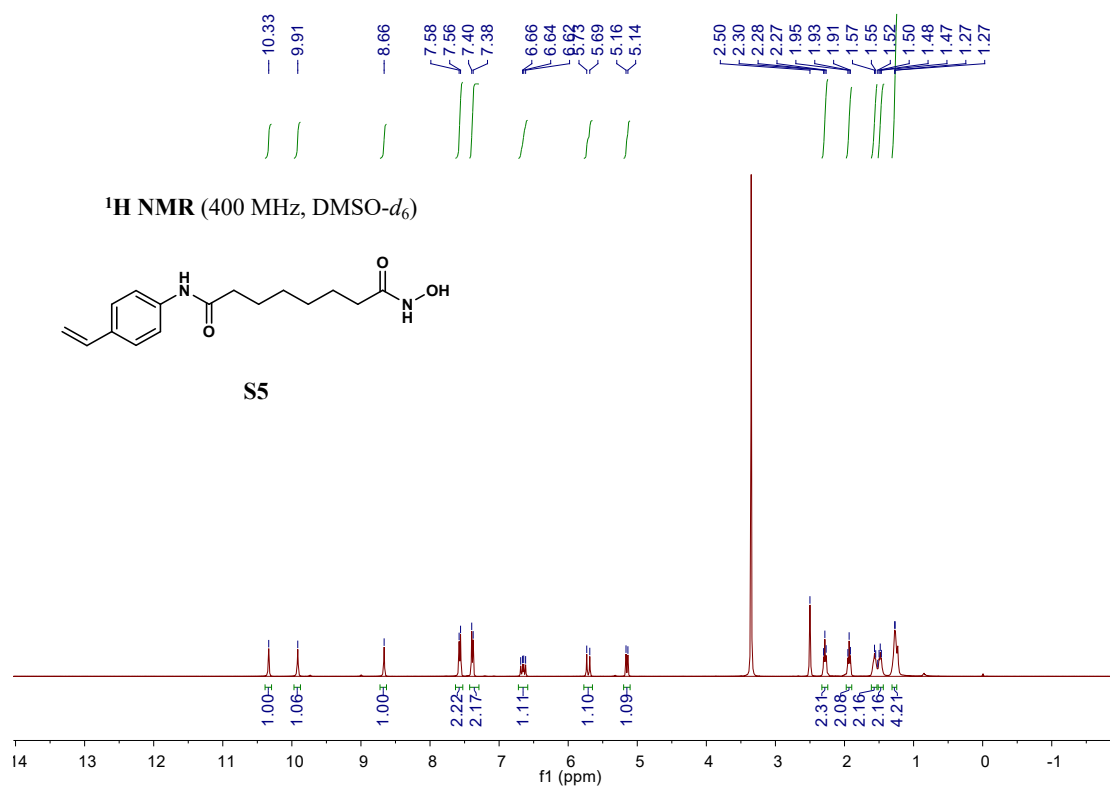

<sup>13</sup>C-NMR of S5

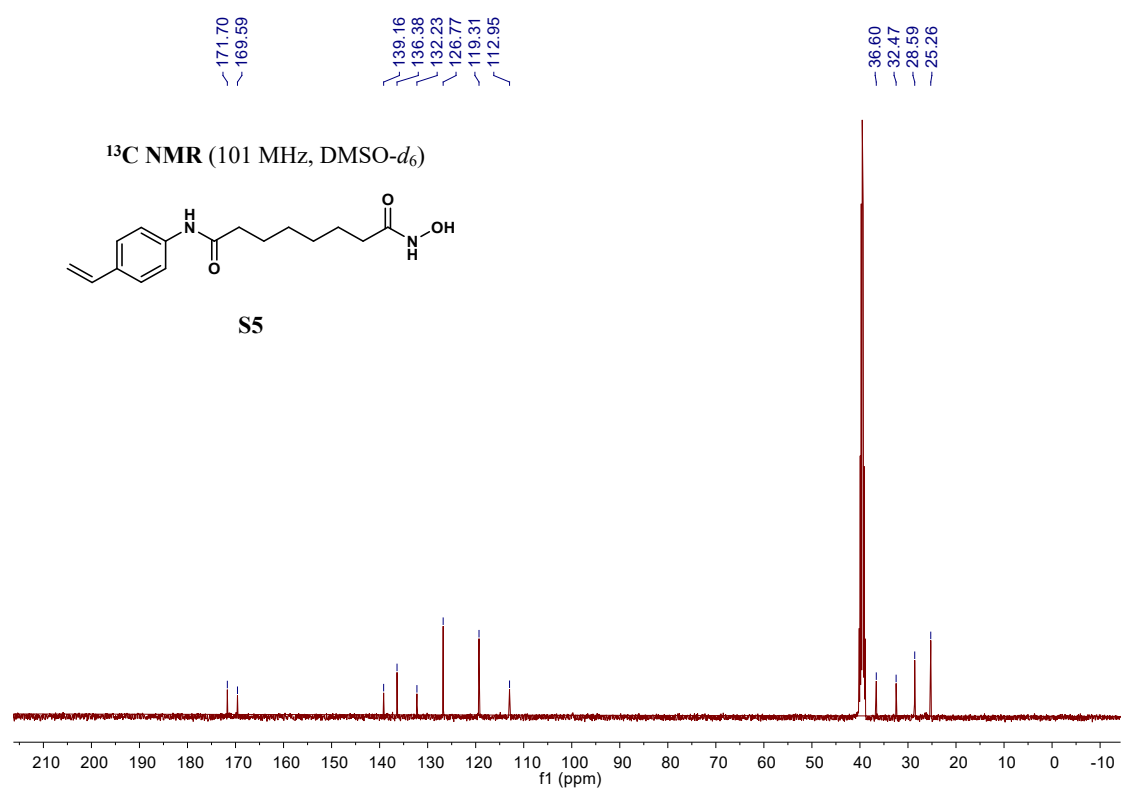

### **7.3 General method for DNA Programmed Affinity Labeling (DPAL)**

A mixture containing the corresponding BP (1  $\mu$ M), CP (1  $\mu$ M), 1x PBS buffer (pH 7.4), 0.1 M NaCl, and CA II protein (1  $\mu$ M) was incubated at 4 °C for 2 h. For the competition experiments, acetazolamide was also added to the mixture at a concentration of 20  $\mu$ M and incubated at 4 °C for 30 min prior to BP/CP addition. The total sample volume was typically 50  $\mu$ L. The mixture was irradiated under UV at 365 nm for 10 minutes over ice. The sample was then added with 5x Loading buffer, heated to 95 °C for 10 min, and then analyzed with SDS-PAGE.<sup>8</sup> Gel images were captured and analyzed by Bio-Rad Chemidoc<sup>TM</sup> imaging system.



## 8. UPLC chromatograph and deconvoluted MS

### 8.1 Substrate scope of DNA-conjugated arylamines for the On-DNA azide transformation

UPLC chromatograph and deconvoluted MS of **1a'**.

**Conversion: >95%**

**Calculated Mass: 5082 Da; Found Mass: 5082 Da**

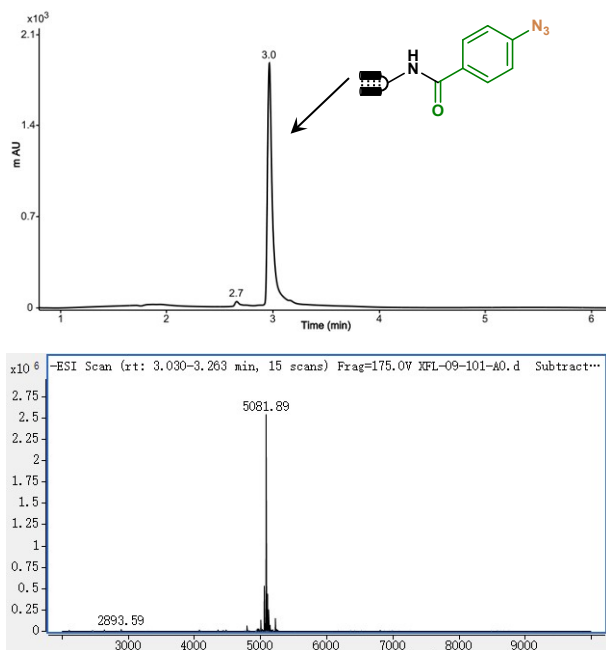

UPLC chromatograph and deconvoluted MS of **1c'**.

**Conversion: >95%**

**Calculated Mass: 5150 Da; Found Mass: 5150 Da**

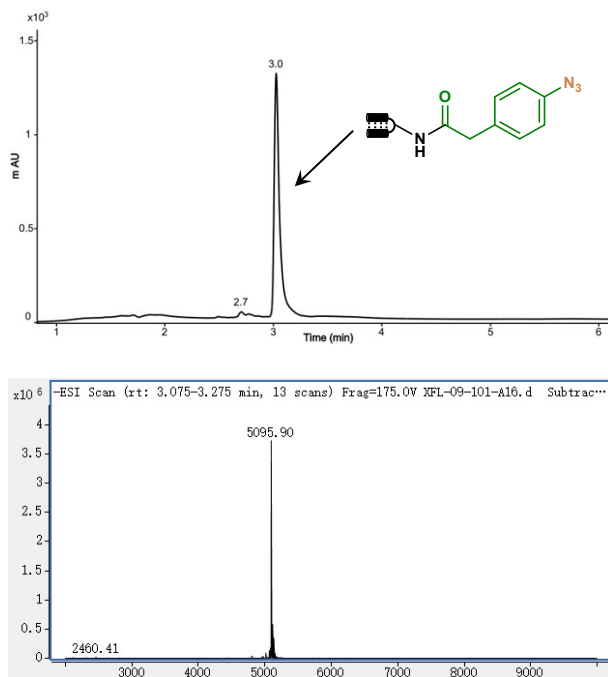

UPLC chromatograph and deconvoluted MS of **1i'**.

**Conversion: 83%**

**Calculated Mass: 5132 Da; Found Mass: 5132 Da**

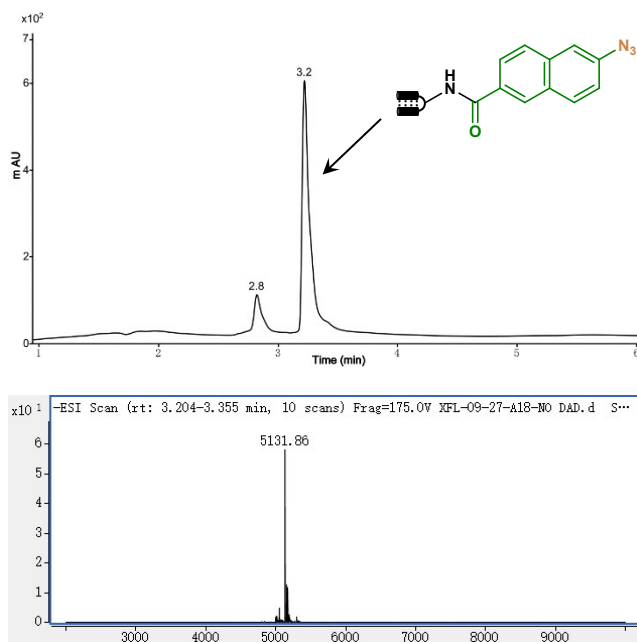

UPLC chromatograph and deconvoluted MS of **1j'**.

**Conversion: >95%**

**Calculated Mass: 5118 Da; Found Mass: 5118 Da**

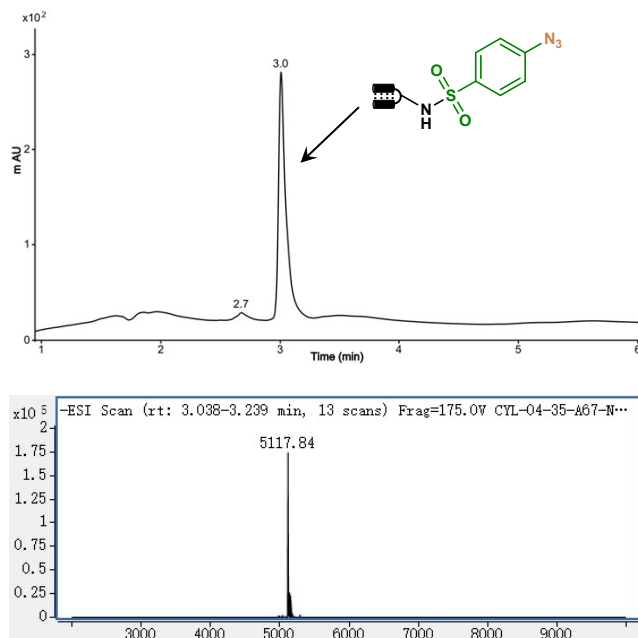

UPLC chromatograph and deconvoluted MS of **1v'**.

**Conversion: >95%**

**Calculated Mass: 5160 Da; Found Mass: 5161 Da**

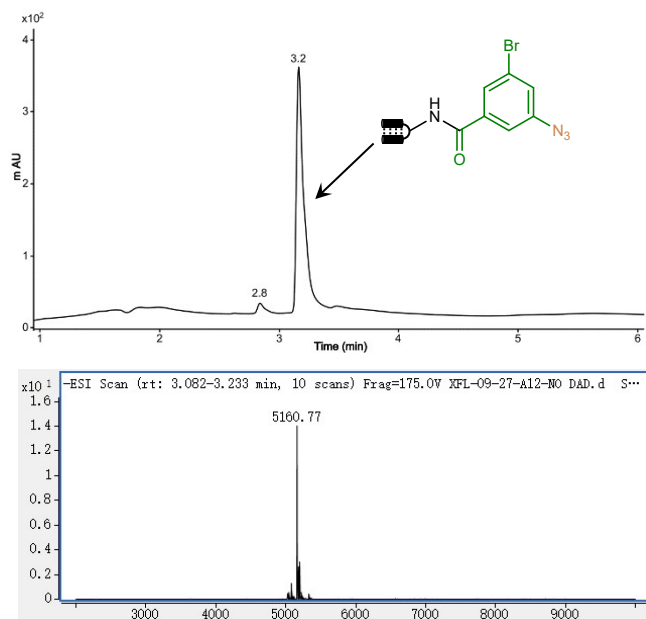

**Calculated Mass: 5160 Da; Found Mass: 5161 Da**

UPLC chromatograph and deconvoluted MS of **1w'**.

**Conversion: 75%**

**Calculated Mass: 5121 Da; Found Mass: 5121 Da**

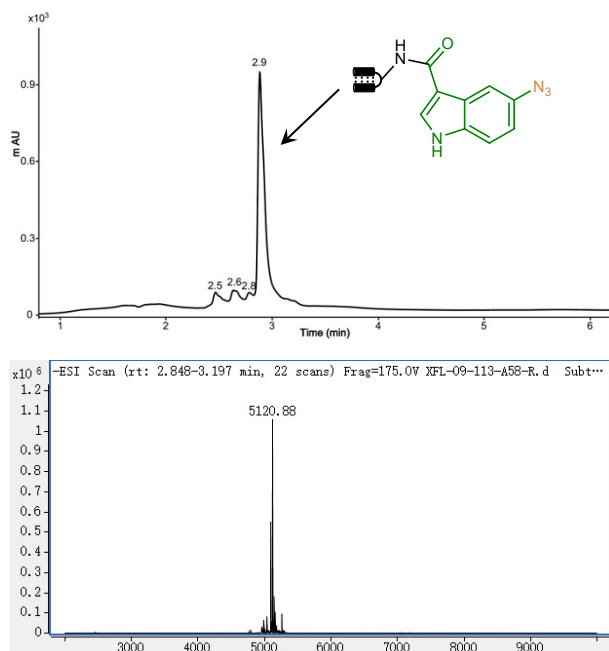

## 8.2 Substrate scope of DNA-conjugated azide for the On-DNA CuAAC reaction

UPLC chromatograph and deconvoluted MS of **9a**.

**Conversion: >90%**

**Calculated Mass: 5184 Da; Found Mass: 5184 Da**

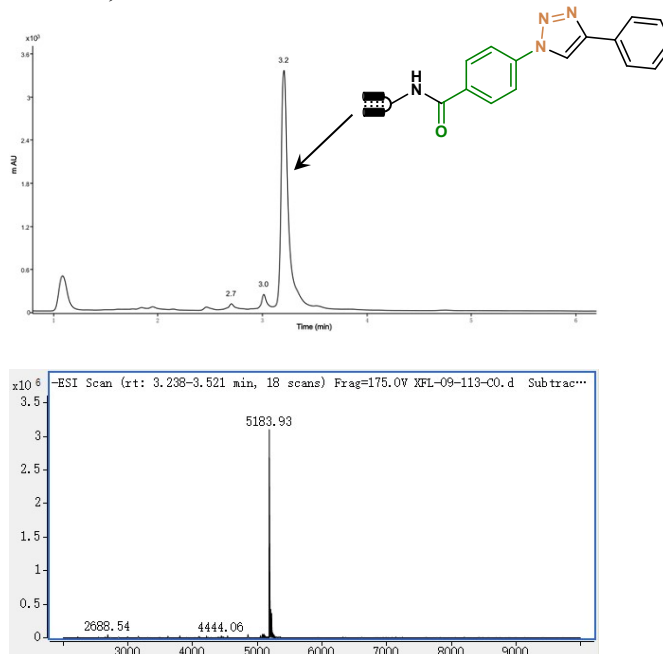

UPLC chromatograph and deconvoluted MS of **9c**.

**Conversion: >90%**

**Calculated Mass: 5234 Da; Found Mass: 5234 Da**

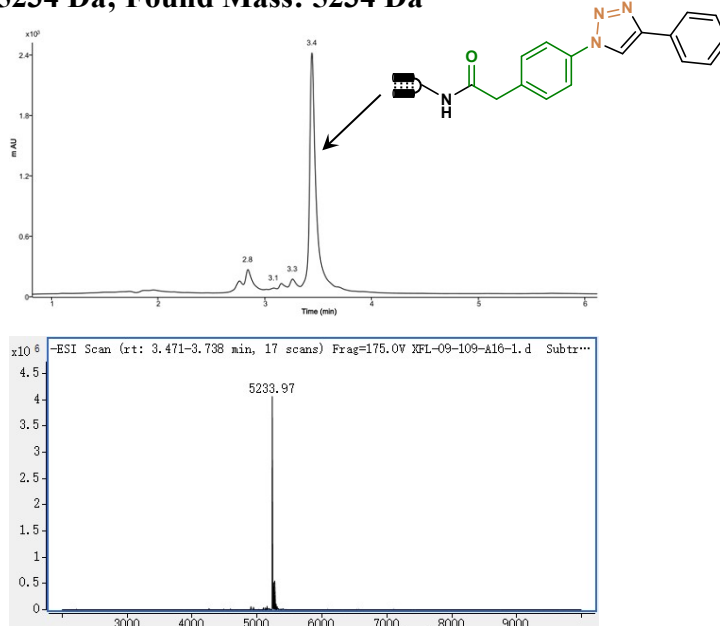

UPLC chromatograph and deconvoluted MS of **9i**.

**Conversion: >90%**

**Calculated Mass: 5220 Da; Found Mass: 5220 Da**

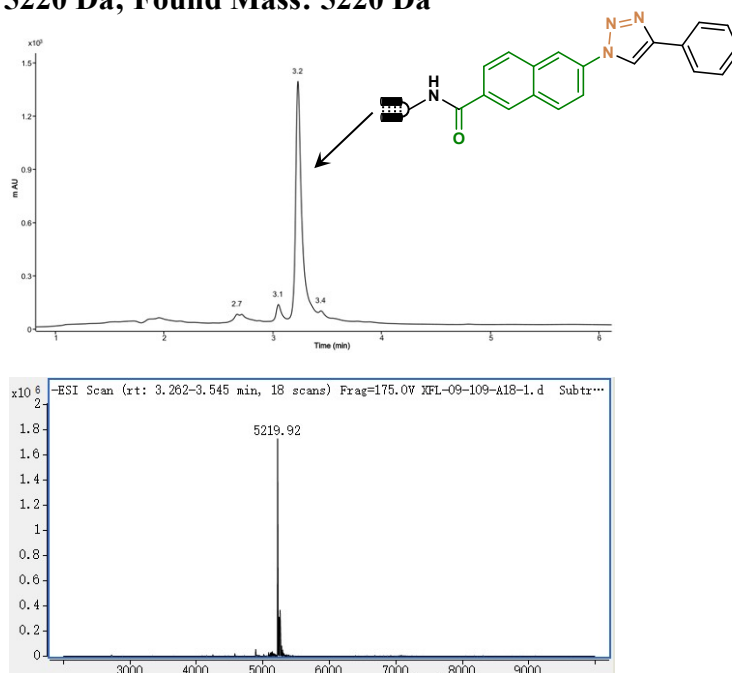

UPLC chromatograph and deconvoluted MS of **9j**.

**Conversion: >90%**

**Calculated Mass: 5198 Da; Found Mass: 5198 Da**

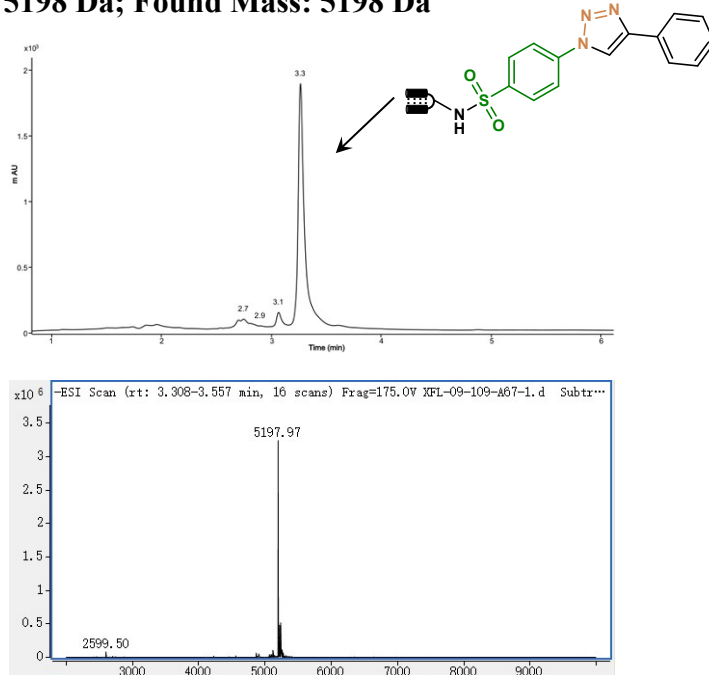

UPLC chromatograph and deconvoluted MS of **9v**.

**Conversion: >90%**

**Calculated Mass: 5263 Da; Found Mass: 5263 Da**

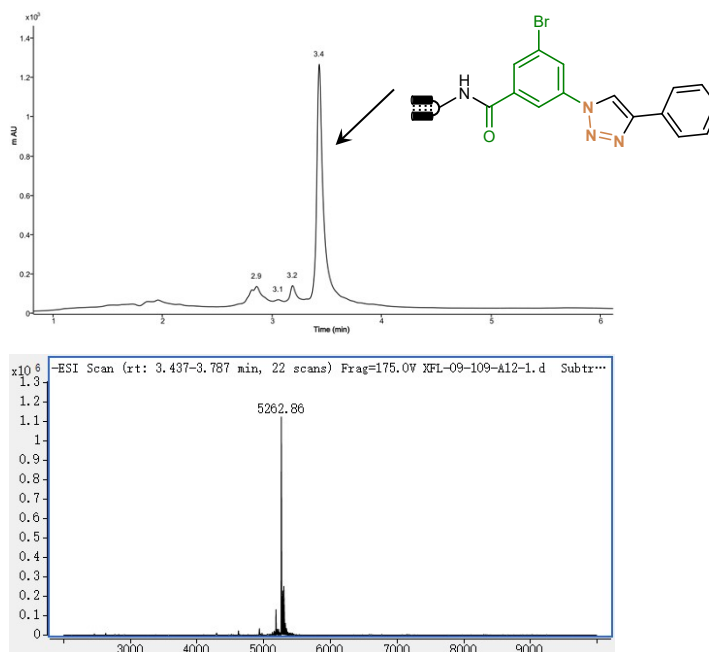

UPLC chromatograph and deconvoluted MS of **9w**.

**Conversion: >90%**

**Calculated Mass: 5223 Da; Found Mass: 5223 Da**

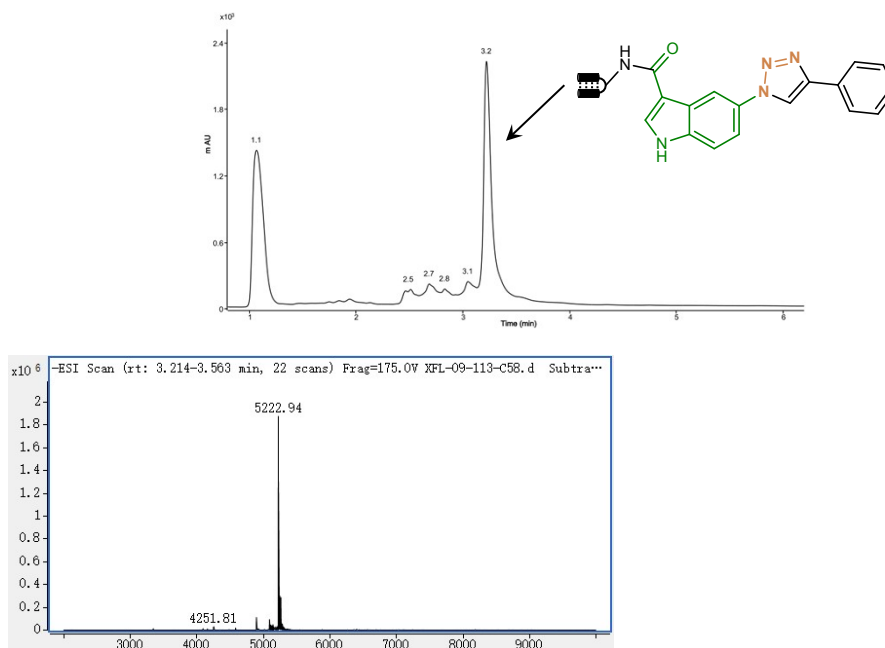

### 8.3 Substrate scope of boronic acids for the on-DNA Suzuki-Miyaura coupling with 1a

UPLC chromatograph and deconvoluted MS of **3a**.

**Conversion: 73%**

**Calculated Mass: 5117 Da; Found Mass: 5117 Da**

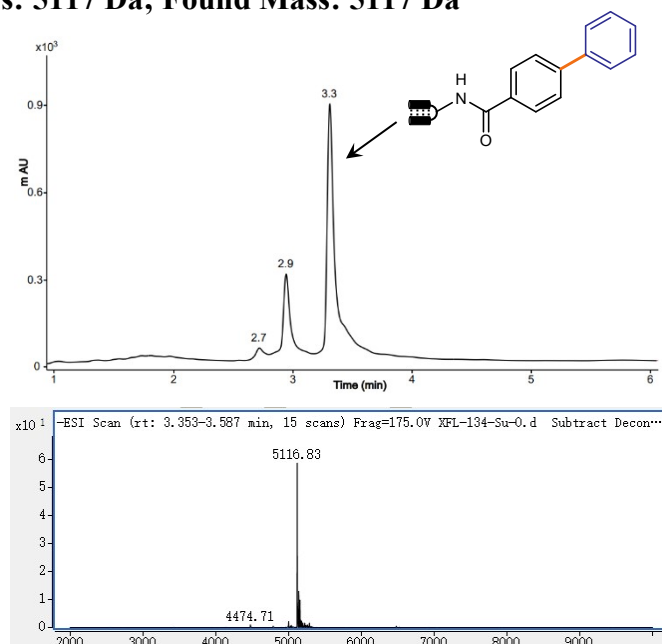

UPLC chromatograph and deconvoluted MS of **3b**.

**Conversion: 62%**

**Calculated Mass: 5131 Da; Found Mass: 5131 Da**

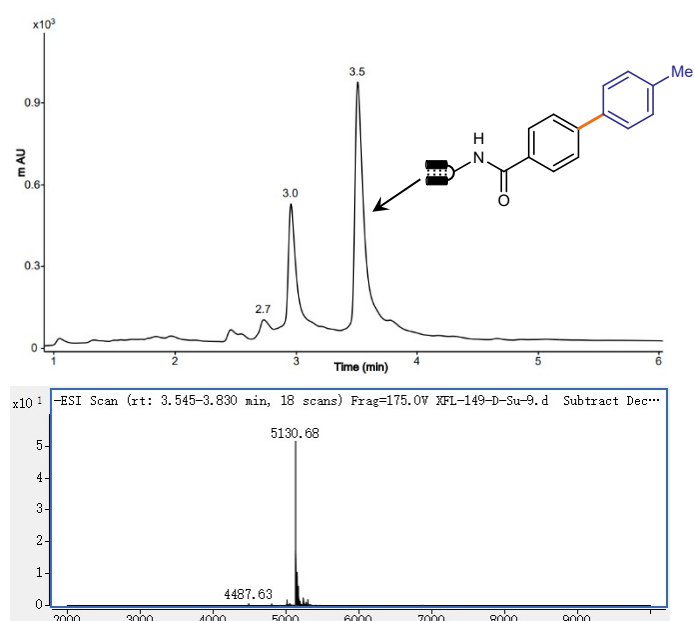



UPLC chromatograph and deconvoluted MS of **3c**.

**Conversion: 77%**

**Calculated Mass: 5147 Da; Found Mass: 5147 Da**

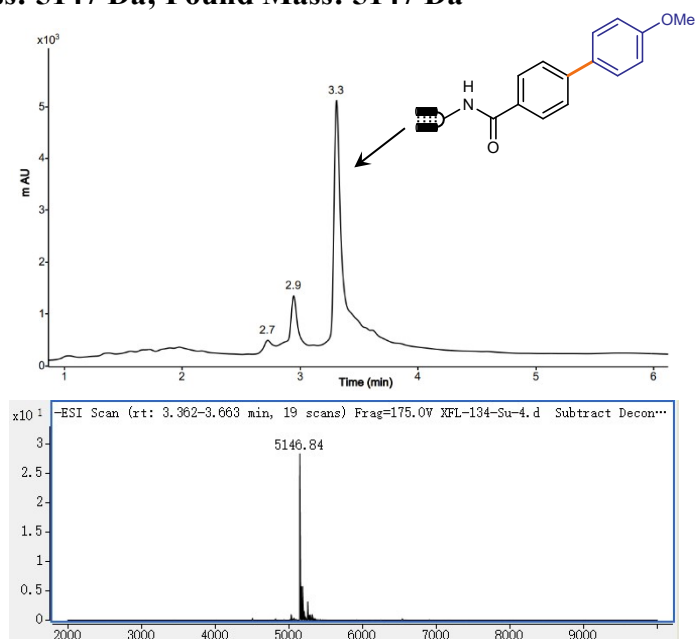

UPLC chromatograph and deconvoluted MS of **3d**.

**Conversion: 63%**

**Calculated Mass: 5173 Da; Found Mass: 5173 Da**

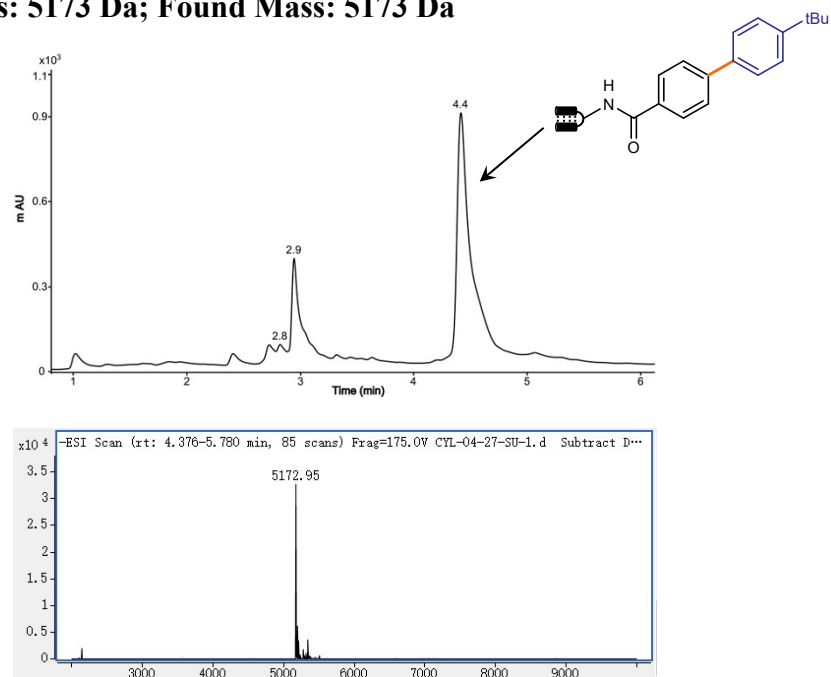

UPLC chromatograph and deconvoluted MS of **3e**.

**Conversion: 91%**

**Calculated Mass: 5135 Da; Found Mass: 5135 Da**

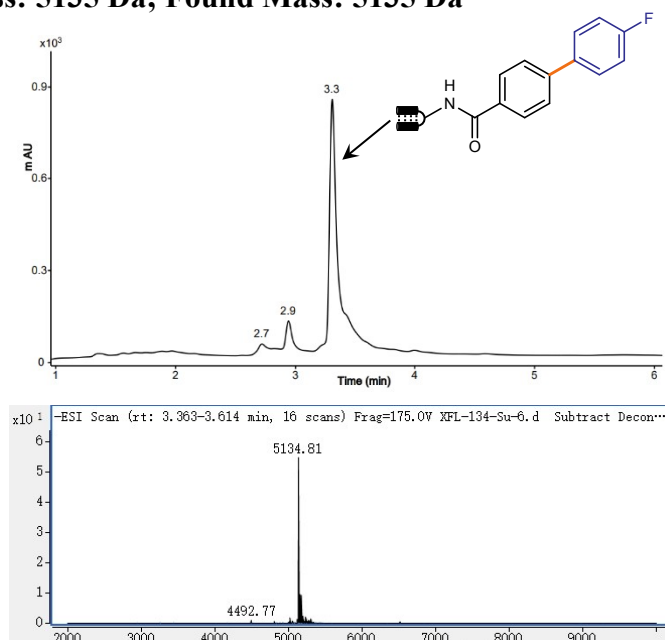

UPLC chromatograph and deconvoluted MS of **3f**.

**Conversion: 65%**

**Calculated Mass: 5161 Da; Found Mass: 5161 Da**

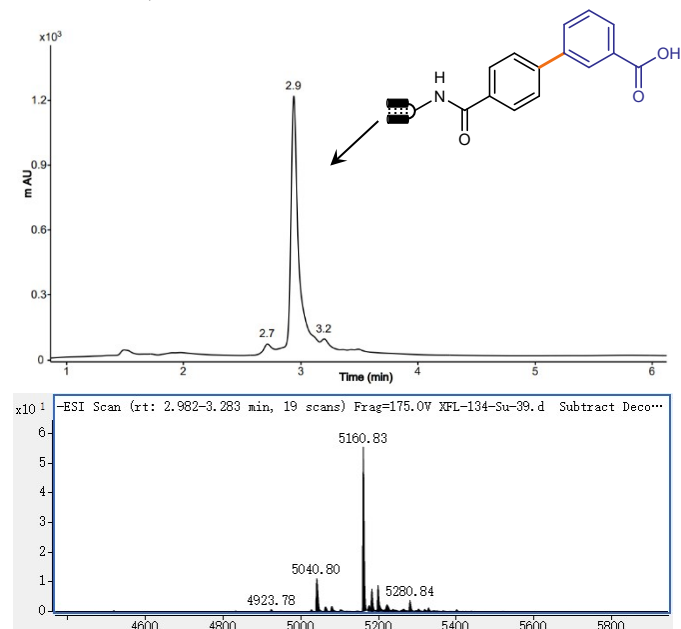

UPLC chromatograph and deconvoluted MS of **3g**.

**Conversion: 75%**

**Calculated Mass: 5195 Da; Found Mass: 5195 Da**

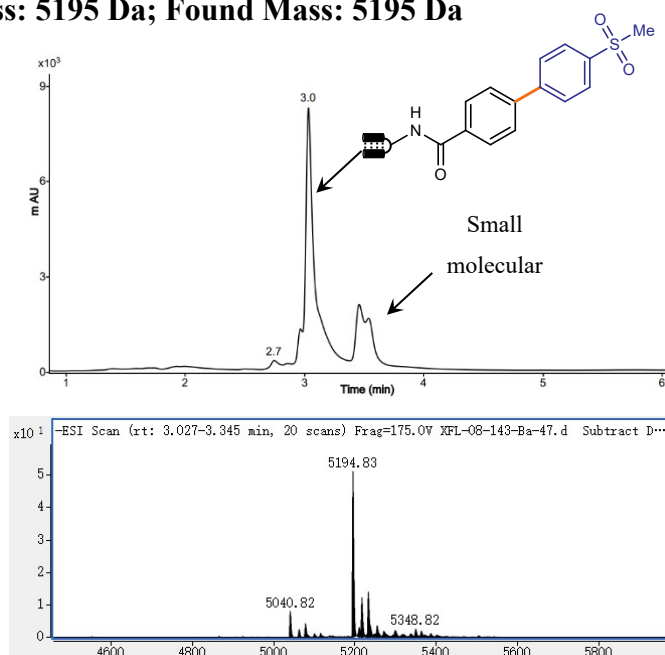

UPLC chromatograph and deconvoluted MS of **3h**.

**Conversion: 70%**

**Calculated Mass: 5131 Da; Found Mass: 5131 Da**

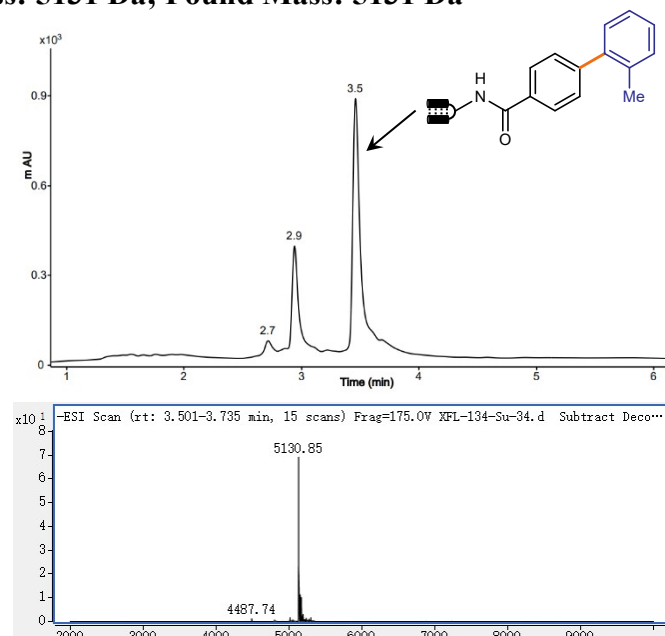

UPLC chromatograph and deconvoluted MS of **3i**.

**Conversion: 68%**

**Calculated Mass: 5131 Da; Found Mass: 5131 Da**

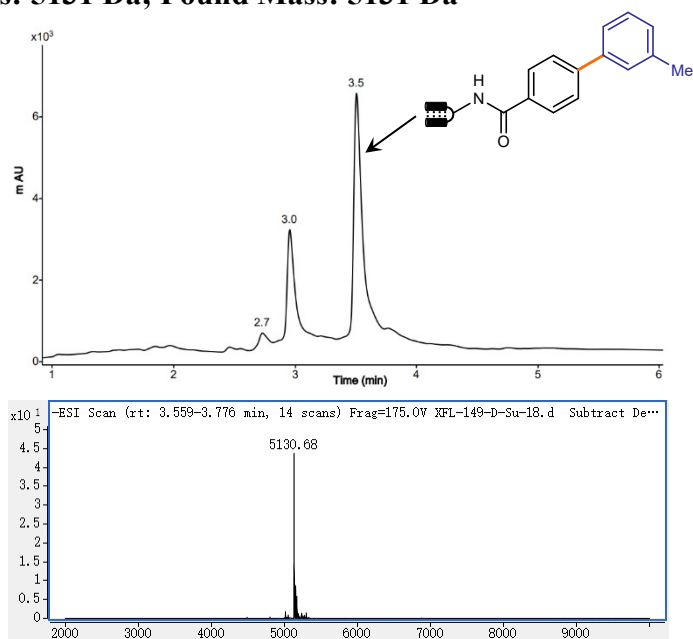

UPLC chromatograph and deconvoluted MS of **3j**.

**Conversion: 82%**

**Calculated Mass: 5188 Da; Found Mass: 5188 Da**

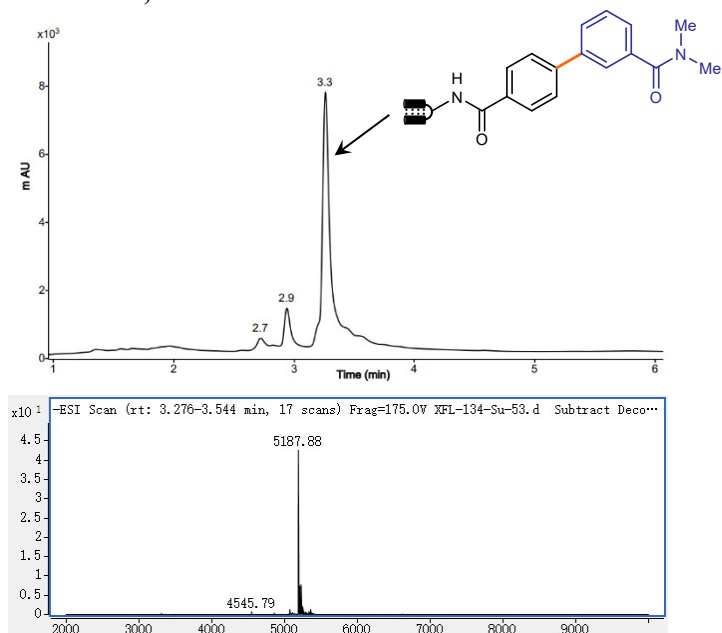

UPLC chromatograph and deconvoluted MS of **3k**.

**Conversion: 78%**

**Calculated Mass: 5175 Da; Found Mass: 5175 Da**

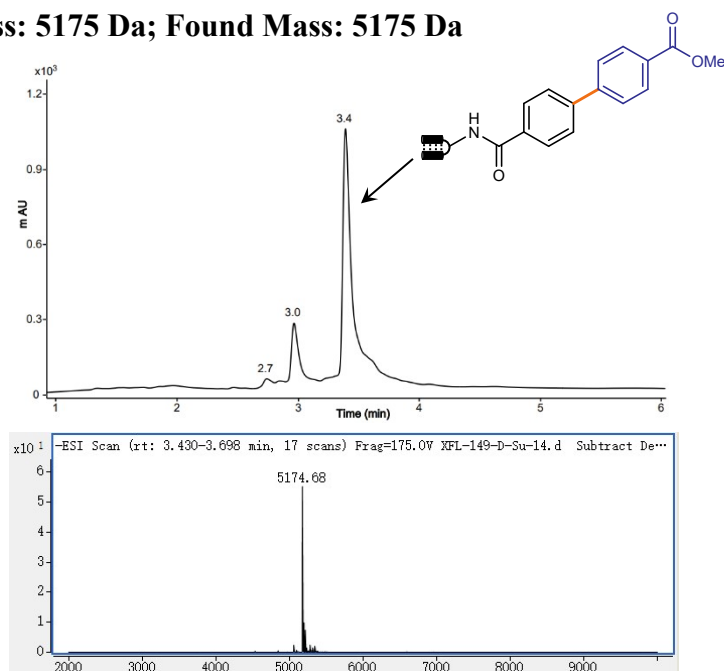

UPLC chromatograph and deconvoluted MS of **3l**.

**Conversion: 63%**

**Calculated Mass: 5169 Da; Found Mass: 5169 Da**

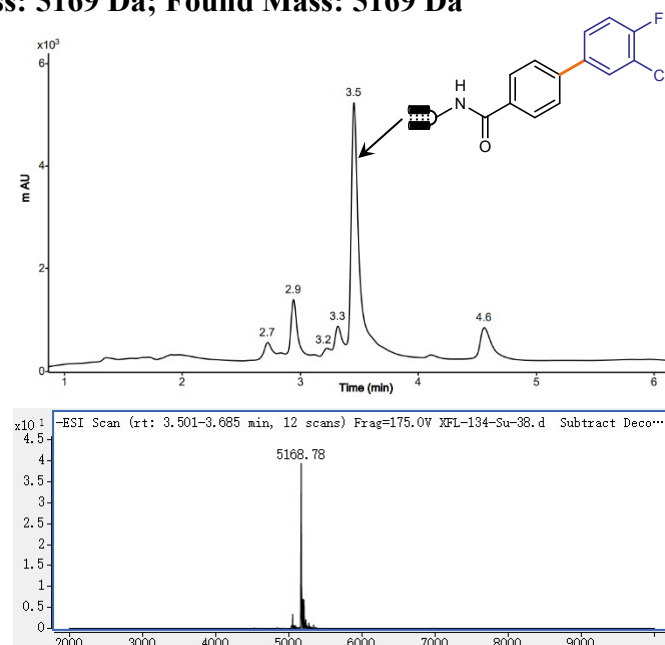

UPLC chromatograph and deconvoluted MS of **3m**.

**Conversion: 85%**

**Calculated Mass: 5165 Da; Found Mass: 5165 Da**

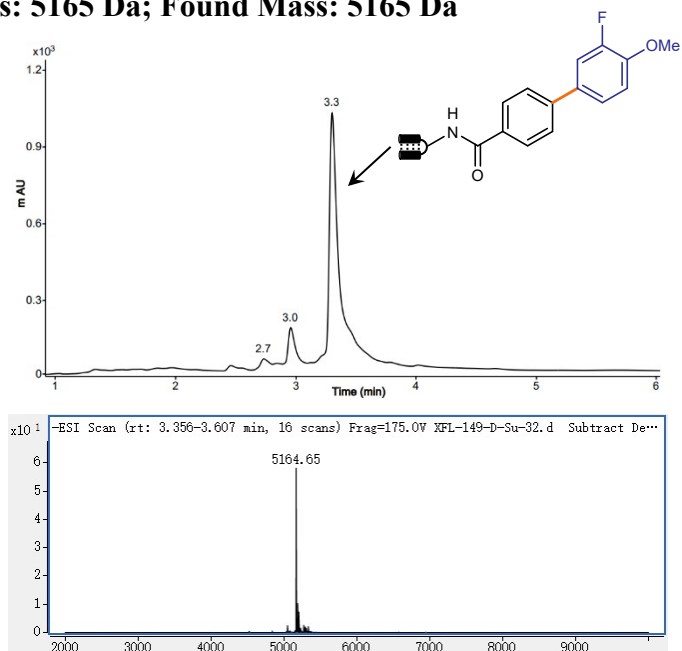

UPLC chromatograph and deconvoluted MS of **3n**.

**Conversion: 83%**

**Calculated Mass: 5167 Da; Found Mass: 5167 Da**

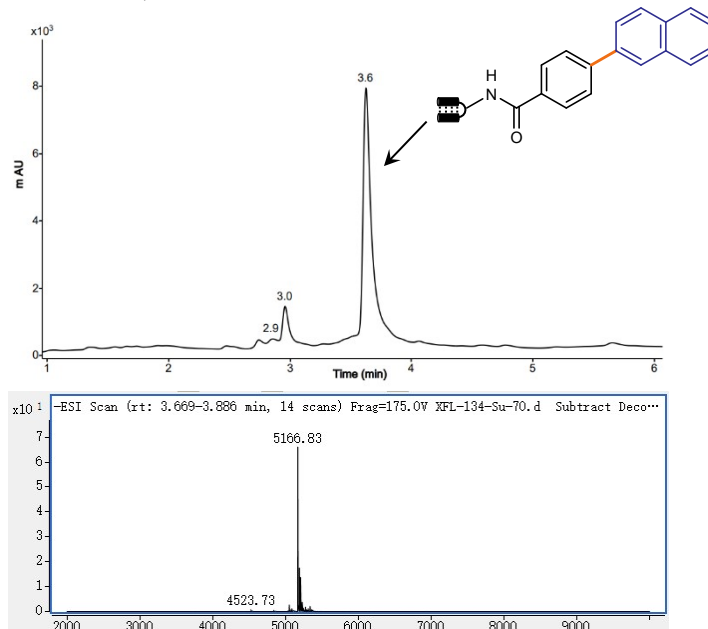

UPLC chromatograph and deconvoluted MS of **3o**.

**Conversion: 85%**

**Calculated Mass: 5161 Da; Found Mass: 5161 Da**

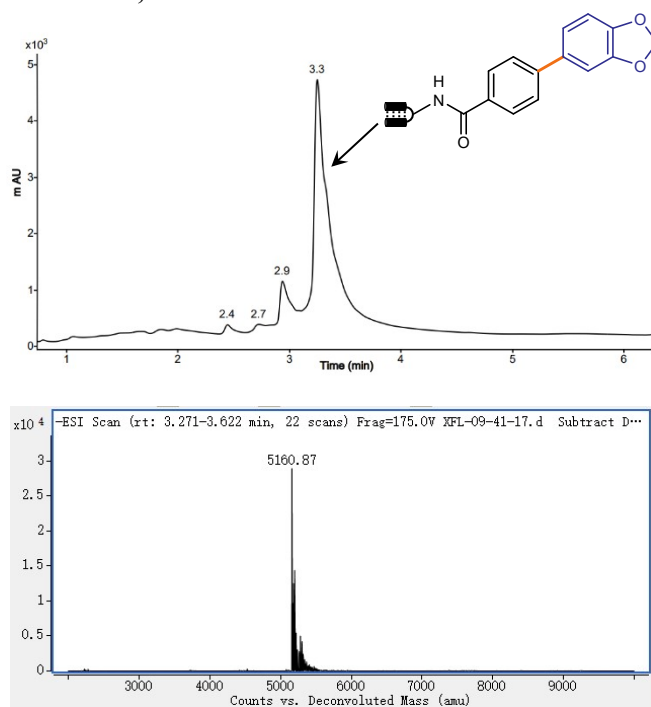

UPLC chromatograph and deconvoluted MS of **3p**.

**Conversion: 80%**

**Calculated Mass: 5207 Da; Found Mass: 5207 Da**

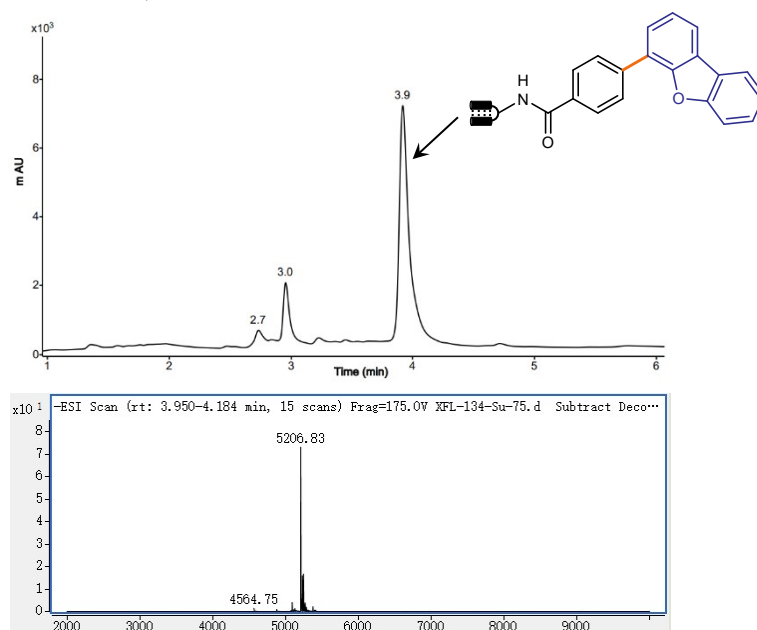

UPLC chromatograph and deconvoluted MS of **3q**.

**Conversion: 82%**

**Calculated Mass: 5157 Da; Found Mass: 5157 Da**

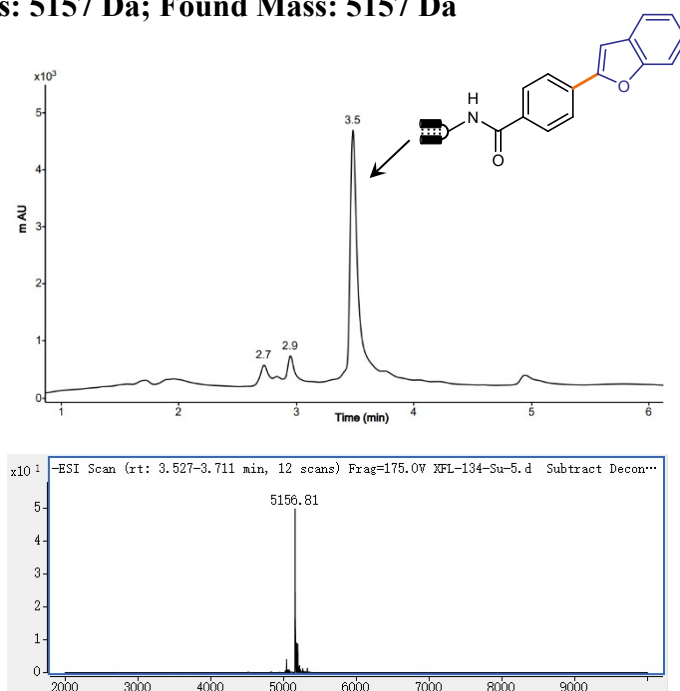

UPLC chromatograph and deconvoluted MS of **3r**.

**Conversion: 77%**

**Calculated Mass: 5123 Da; Found Mass: 5123 Da**

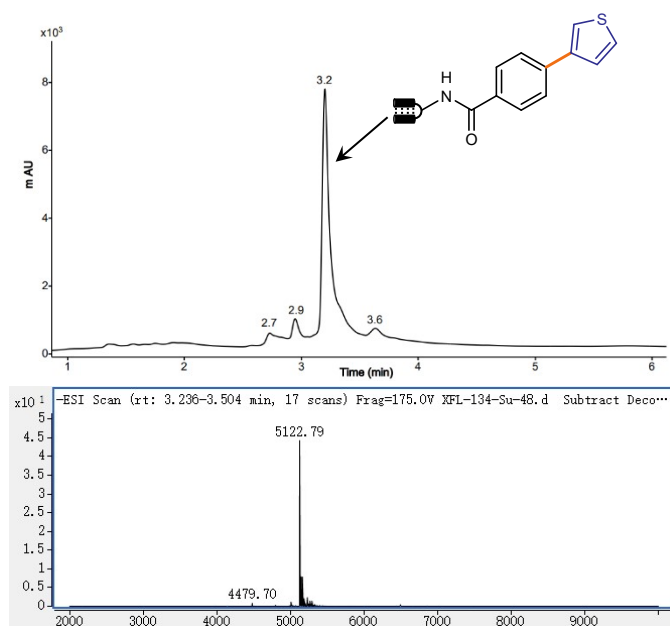



UPLC chromatograph and deconvoluted MS of **3s**.

**Conversion: 60%**

**Calculated Mass: 5173 Da; Found Mass: 5173 Da**

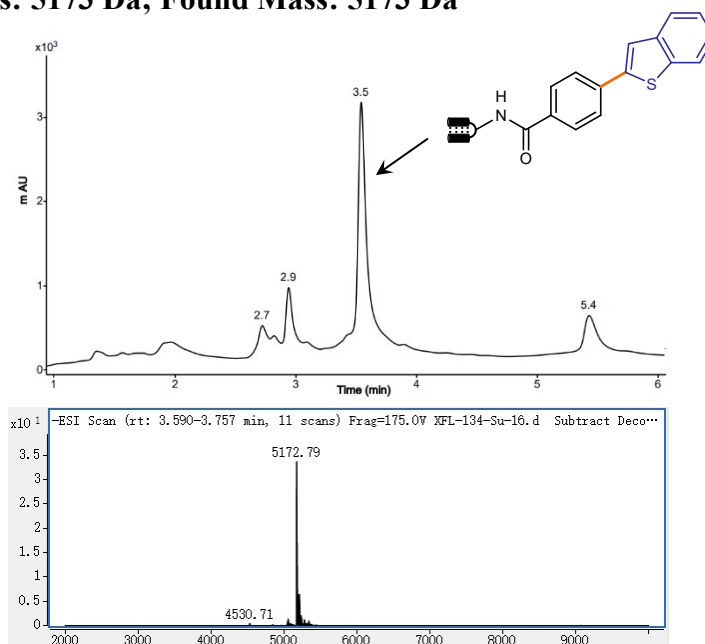

UPLC chromatograph and deconvoluted MS of **3t**.

**Conversion: 78%**

**Calculated Mass: 5223 Da; Found Mass: 5223 Da**

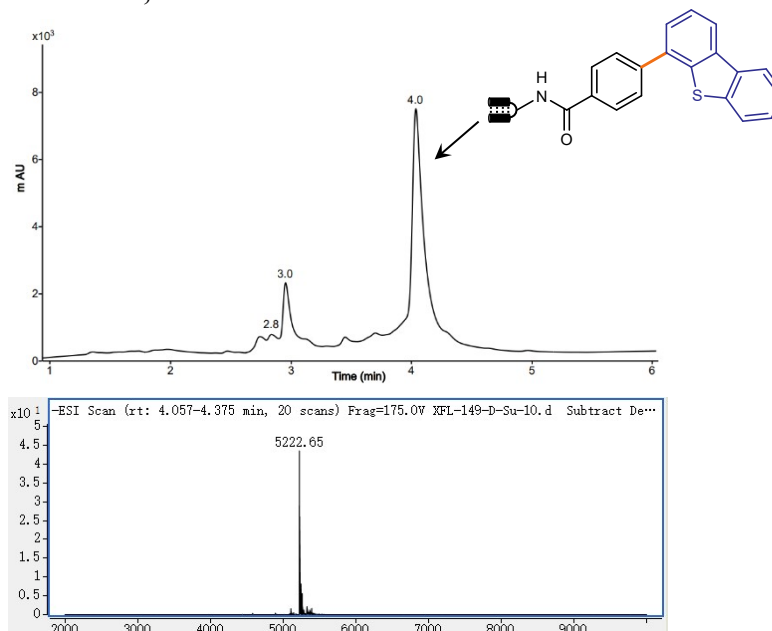

UPLC chromatograph and deconvoluted MS of **3u**.

**Conversion: 83%**

**Calculated Mass: 5117 Da; Found Mass: 5117 Da**

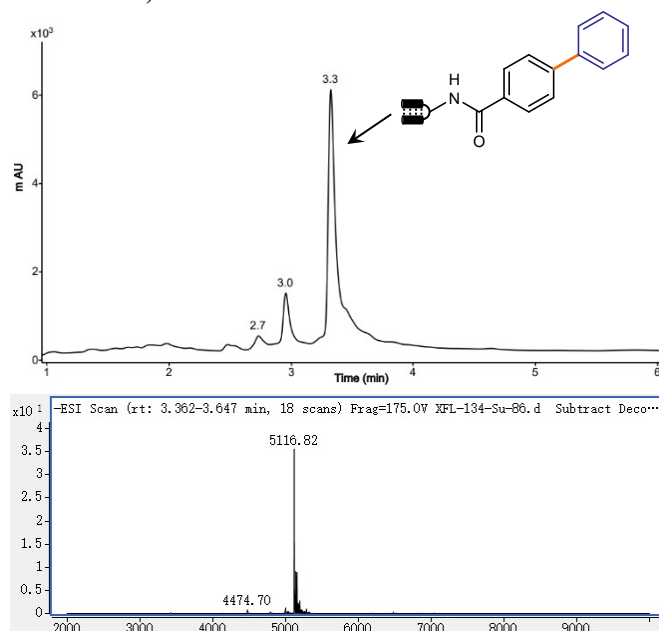

UPLC chromatograph and deconvoluted MS of **3v**.

**Conversion: 70%**

**Calculated Mass: 5117 Da; Found Mass: 5117 Da**

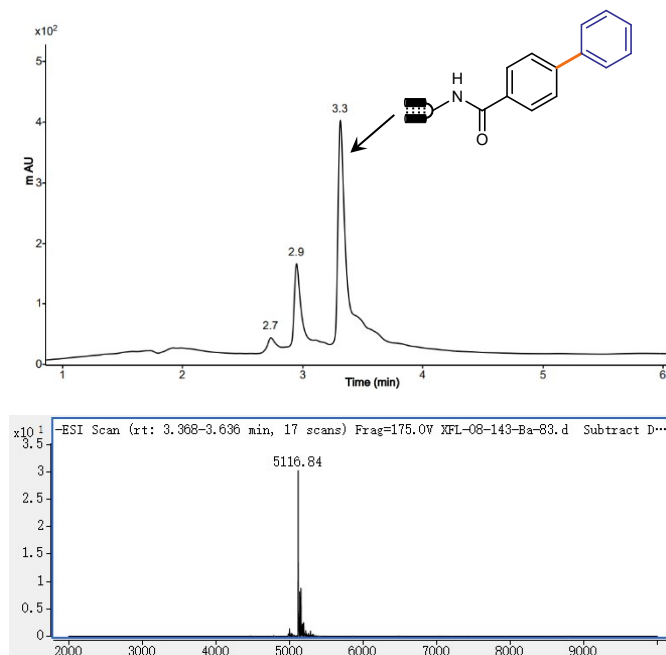

UPLC chromatograph and deconvoluted MS of **3w**.

**Conversion: 83%**

**Calculated Mass: 5167 Da; Found Mass: 5167 Da**

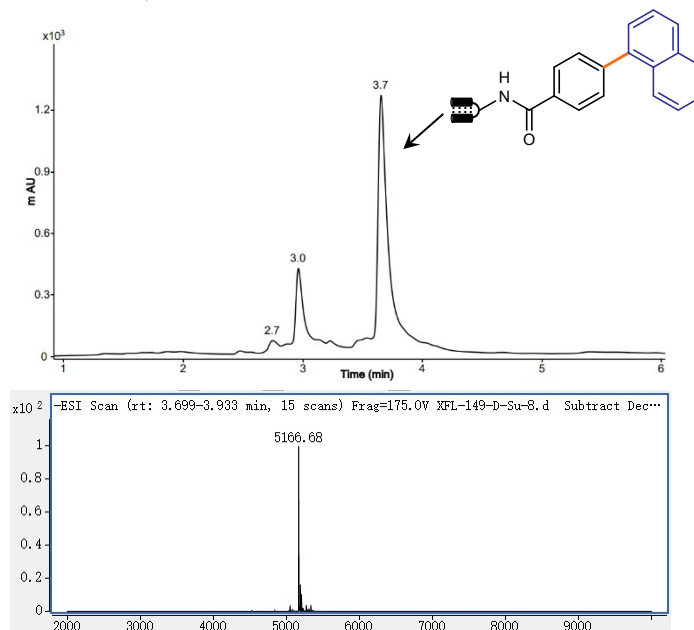

UPLC chromatograph and deconvoluted MS of **3x**.

**Conversion: 50%**

**Calculated Mass: 5163 Da; Found Mass: 5163 Da**

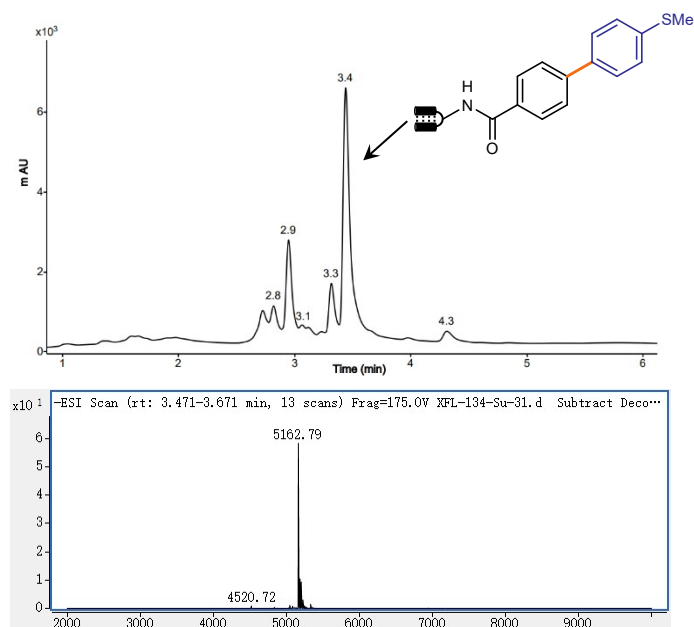

UPLC chromatograph and deconvoluted MS of **3y**.

**Conversion: 79%**

**Calculated Mass: 5135 Da; Found Mass: 5135 Da**

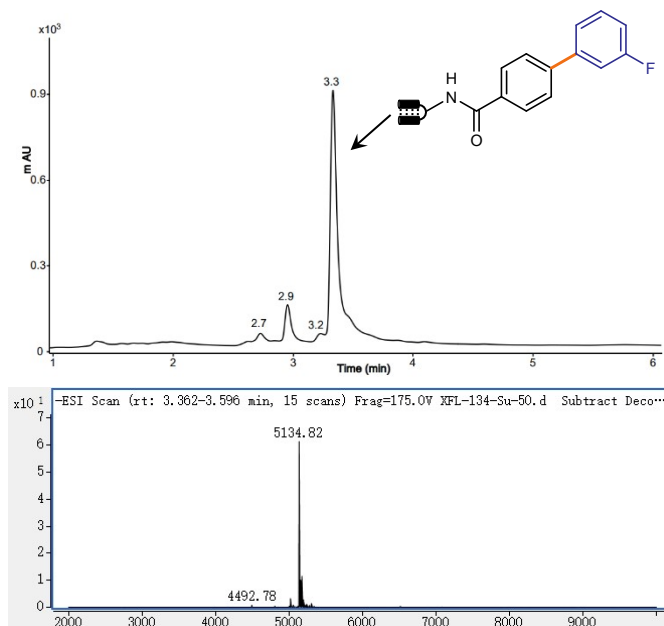

UPLC chromatograph and deconvoluted MS of **3z**.

**Conversion: 66%**

**Calculated Mass: 5135 Da; Found Mass: 5135 Da**

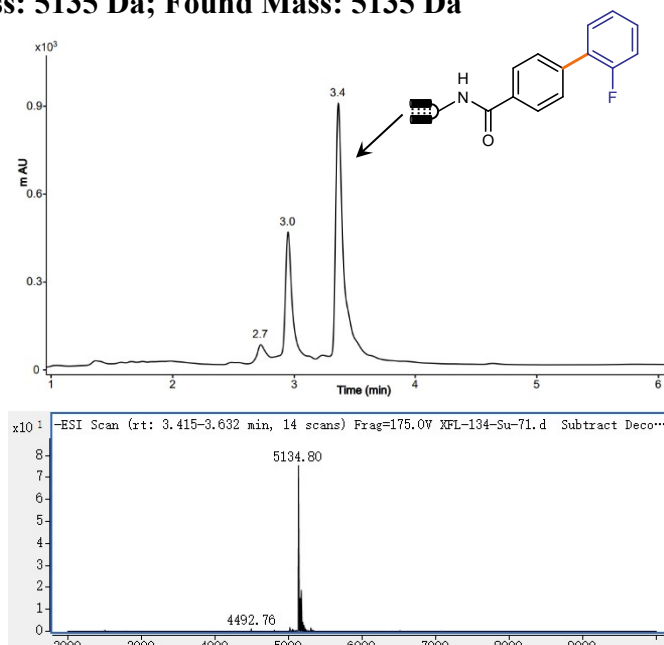

UPLC chromatograph and deconvoluted MS of **3aa**.

**Conversion: 86%**

**Calculated Mass: 5153 Da; Found Mass: 5153 Da**

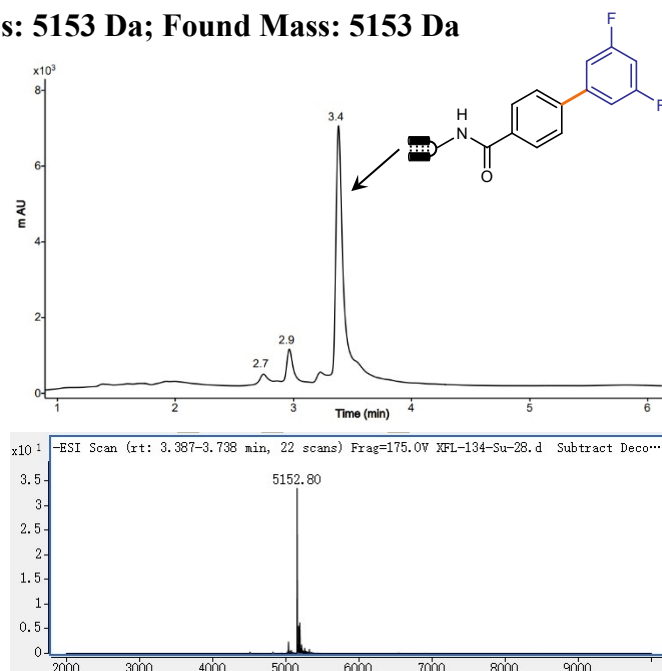

UPLC chromatograph and deconvoluted MS of **3ab**.

**Conversion: 80%**

**Calculated Mass: 5185 Da; Found Mass: 5185 Da**

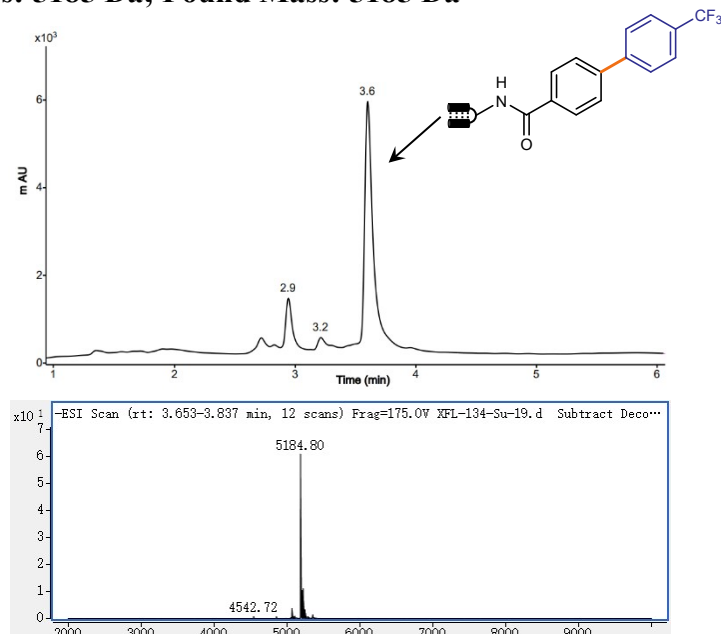

UPLC chromatograph and deconvoluted MS of **3ac**.

**Conversion: 59%**

**Calculated Mass: 5162 Da; Found Mass: 5162 Da**

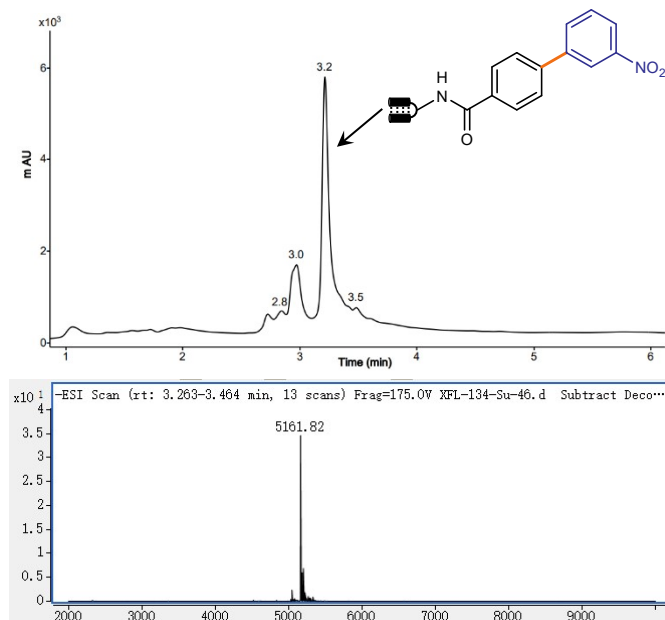

UPLC chromatograph and deconvoluted MS of **3ad**.

**Conversion: 65%**

**Calculated Mass: 5201 Da; Found Mass: 5201 Da**

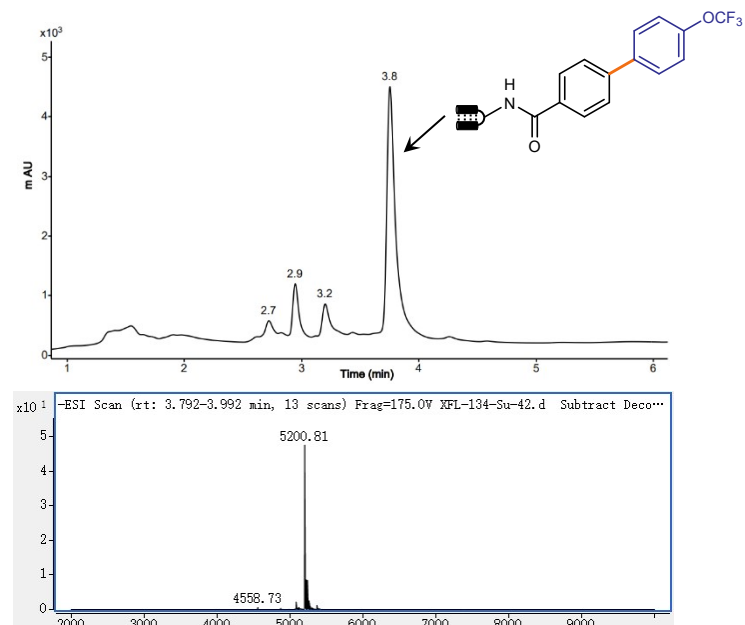

UPLC chromatograph and deconvoluted MS of **3ae**.

**Conversion: 57%**

**Calculated Mass: 5149 Da; Found Mass: 5149 Da**

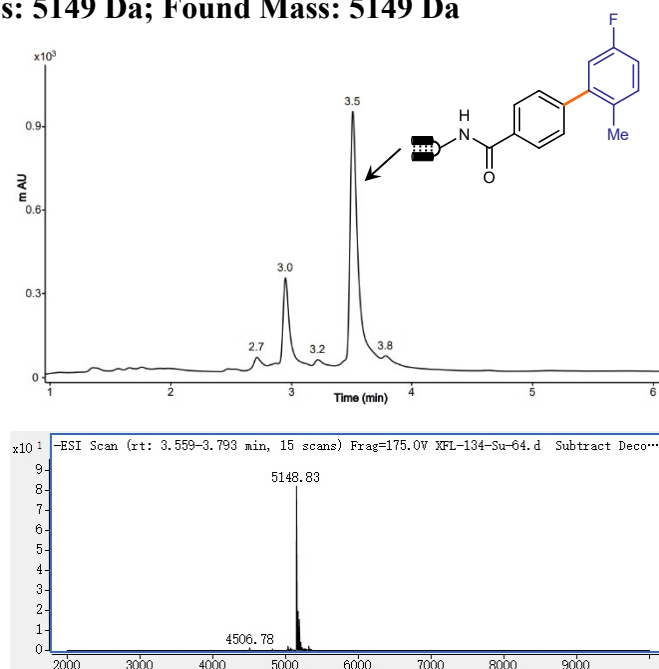

UPLC chromatograph and deconvoluted MS of **3af**.

**Conversion: 67%**

**Calculated Mass: 5165 Da; Found Mass: 5165 Da**

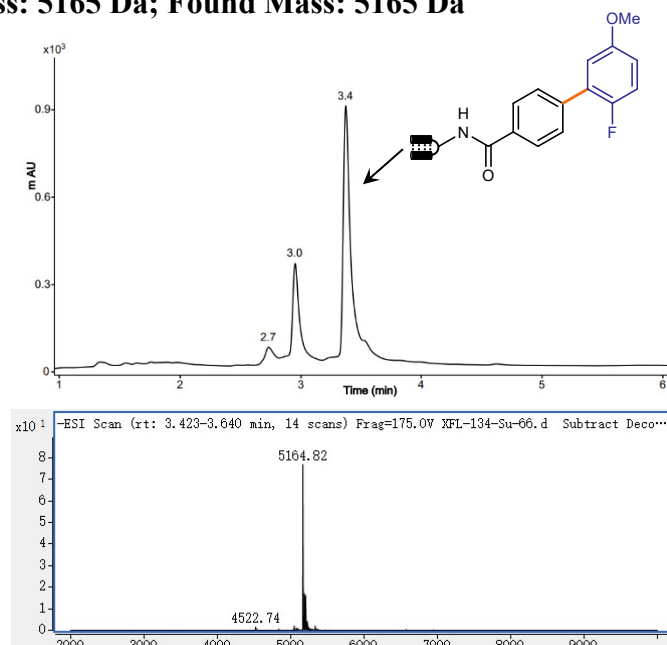

UPLC chromatograph and deconvoluted MS of **3ag**.

**Conversion: 75%**

**Calculated Mass: 5185 Da; Found Mass: 5185 Da**

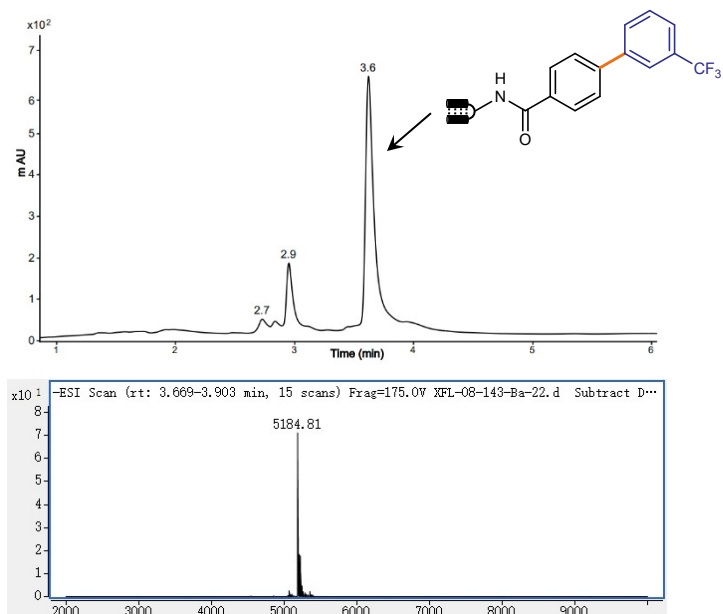



## 8.4 Substrate scope of DNA-conjugated arylamines for the On-DNA Suzuki-Miyaura coupling

UPLC chromatograph and deconvoluted MS of **3k**.

**Conversion: 78%**

**Calculated Mass: 5175 Da; Found Mass: 5175 Da**

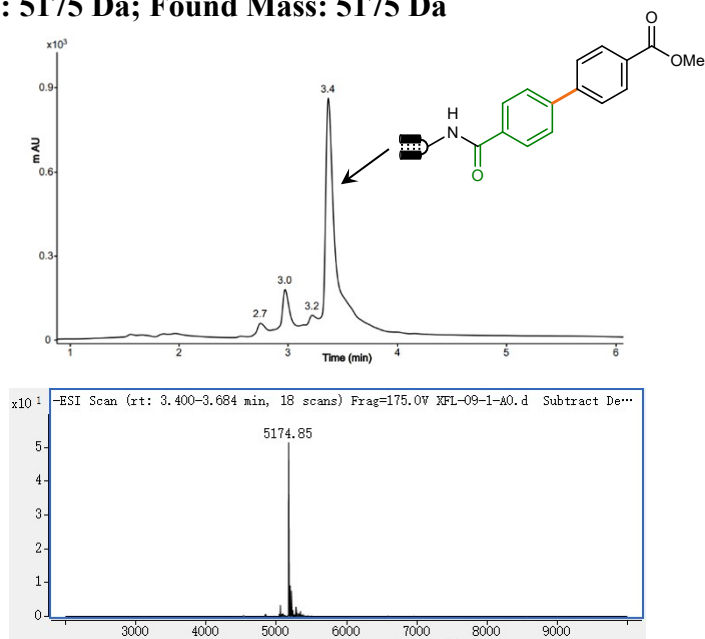

UPLC chromatograph and deconvoluted MS of **3ah**.

**Conversion: 79%**

**Calculated Mass: 5175 Da; Found Mass: 5175 Da**

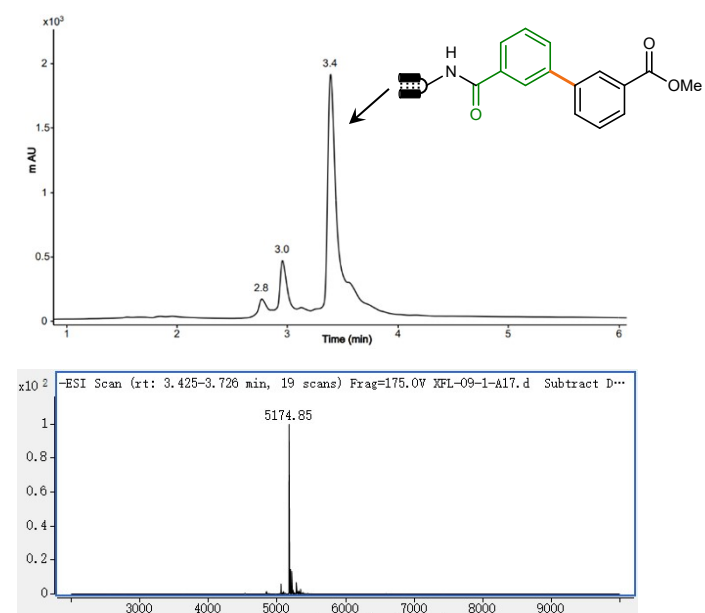

UPLC chromatograph and deconvoluted MS of **3ai**.

**Conversion: 73%**

**Calculated Mass: 5189 Da; Found Mass: 5189 Da**

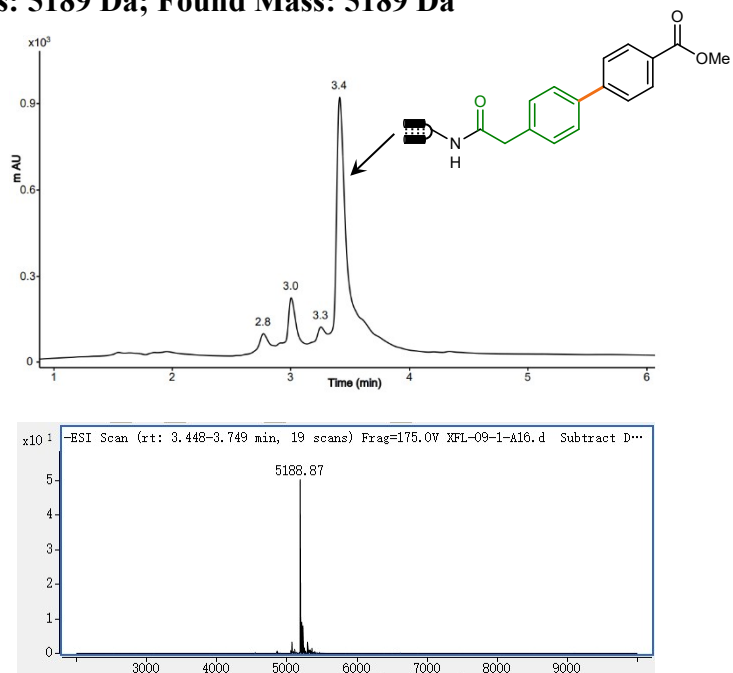

UPLC chromatograph and deconvoluted MS of **3aj**.

**Conversion: 67%**

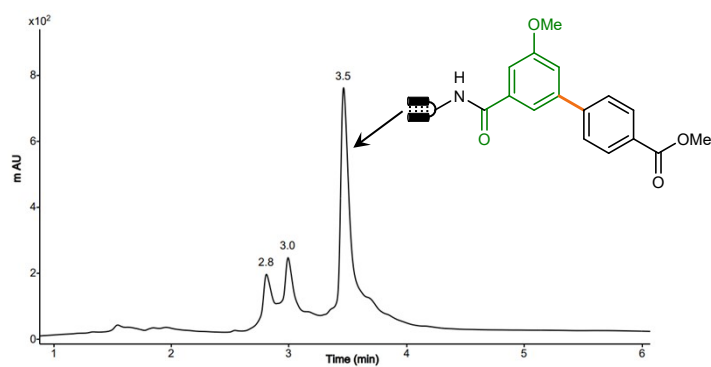

**Calculated Mass: 5205 Da; Found Mass: 5205 Da**

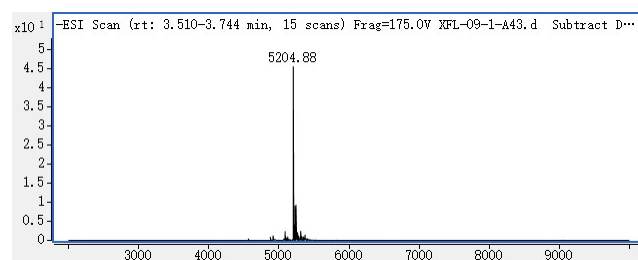

UPLC chromatograph and deconvoluted MS of **3ak**.

**Conversion: 62%**

**Calculated Mass: 5243 Da; Found Mass: 5243 Da**

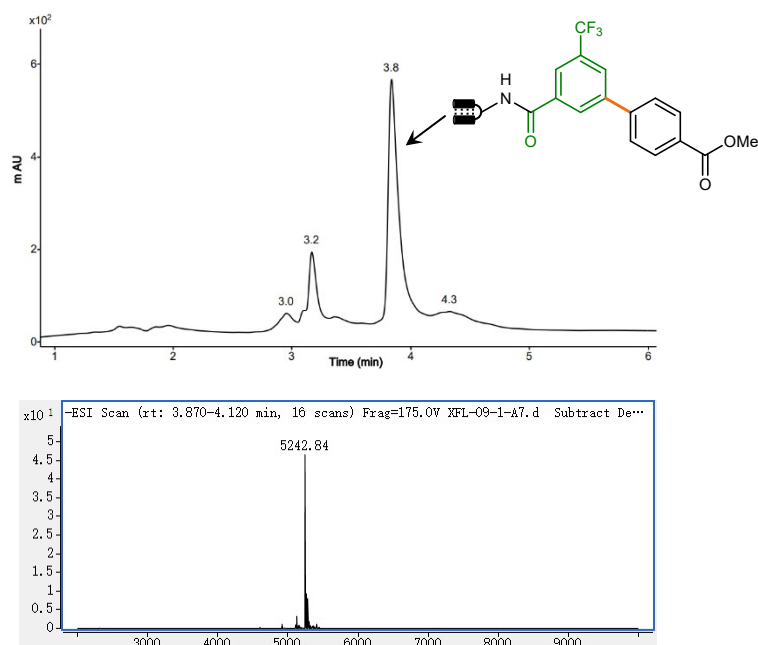

UPLC chromatograph and deconvoluted MS of **3al**.

**Conversion: 80%**

**Calculated Mass: 5205 Da; Found Mass: 5205 Da**

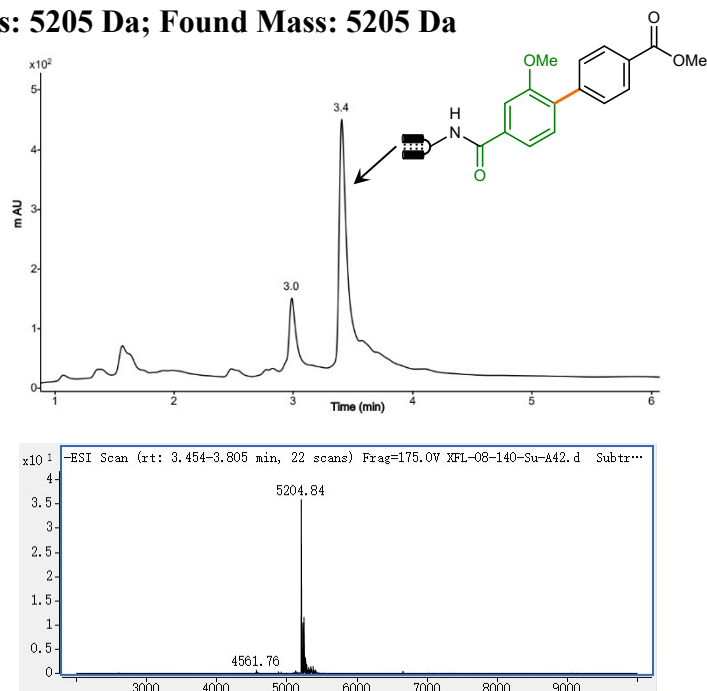

UPLC chromatograph and deconvoluted MS of **3am**.

**Conversion: 66%**

**Calculated Mass: 5233 Da; Found Mass: 5233 Da**

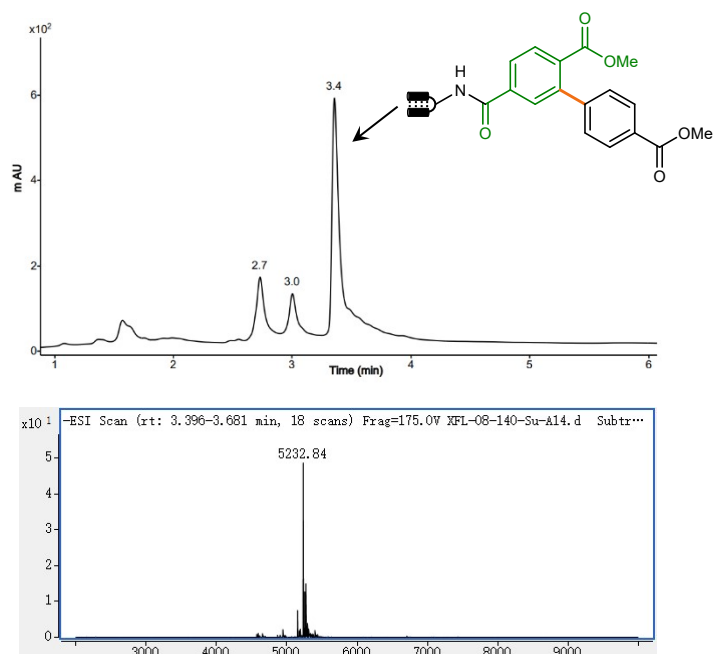

UPLC chromatograph and deconvoluted MS of **3an**.

**Conversion: 70%**

**Calculated Mass: 5251 Da; Found Mass: 5251 Da**

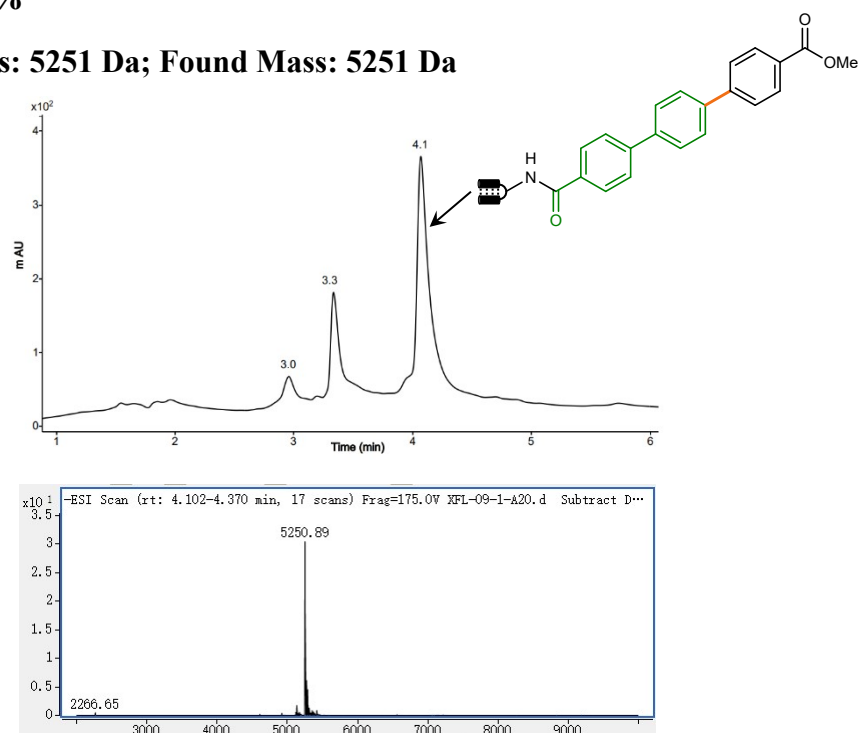

UPLC chromatograph and deconvoluted MS of **3ao**.

**Conversion: 66%**

**Calculated Mass: 5225 Da; Found Mass: 5225 Da**

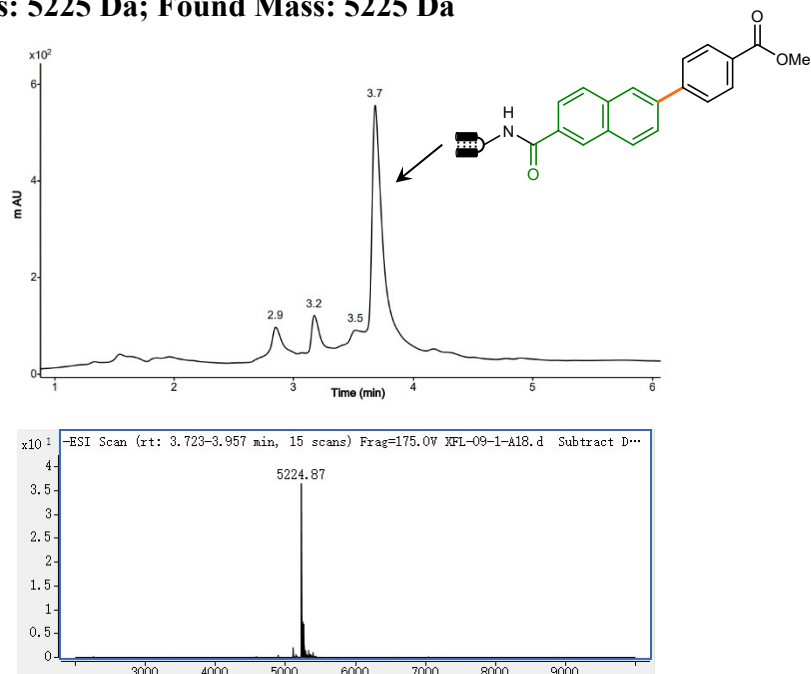

UPLC chromatograph and deconvoluted MS of **3ap**.

**Conversion: 67%**

**Calculated Mass: 5211 Da; Found Mass: 5211 Da**

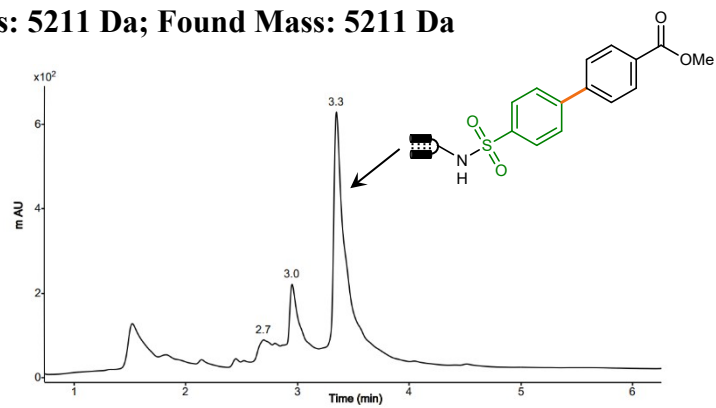

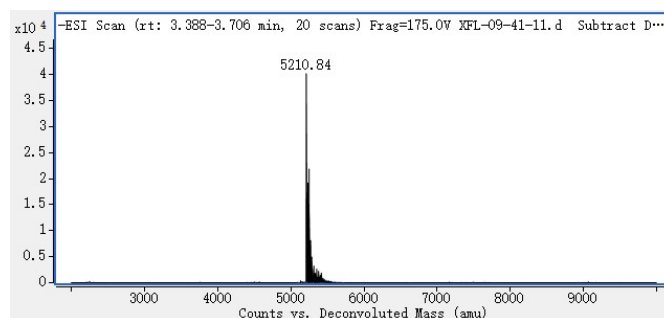

UPLC chromatograph and deconvoluted MS of **3aq**.

**Conversion: 85%**

**Calculated Mass: 5193 Da; Found Mass: 5193 Da**

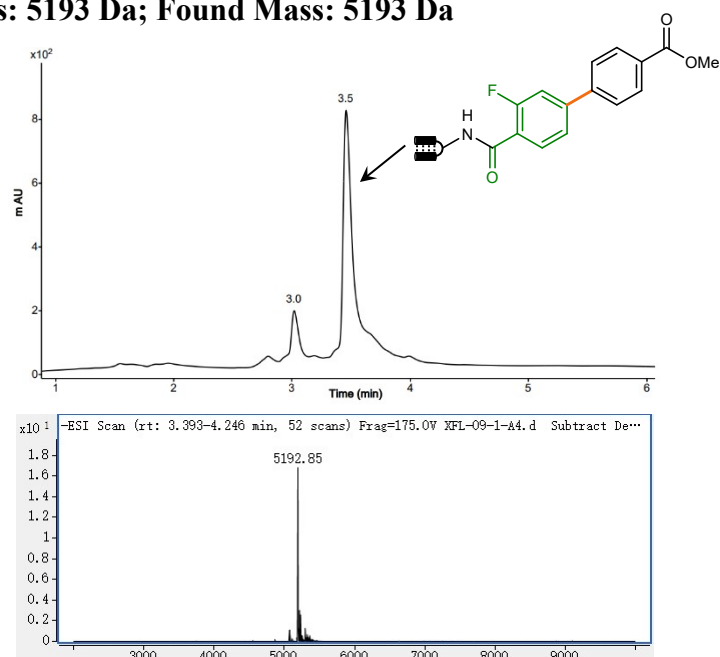

UPLC chromatograph and deconvoluted MS of **3ar**.

**Conversion: 72%**

**Calculated Mass: 5207 Da; Found Mass: 5207 Da**

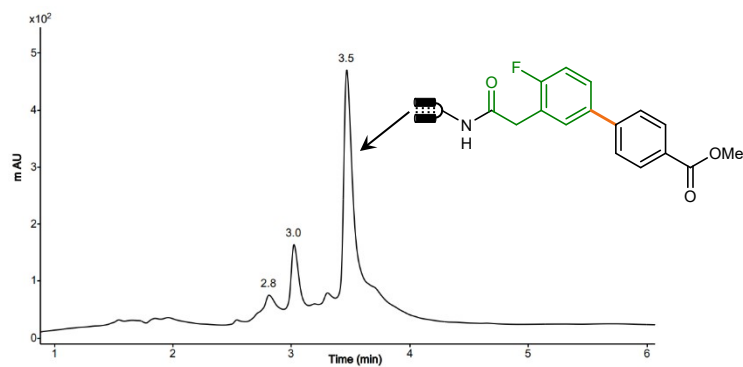

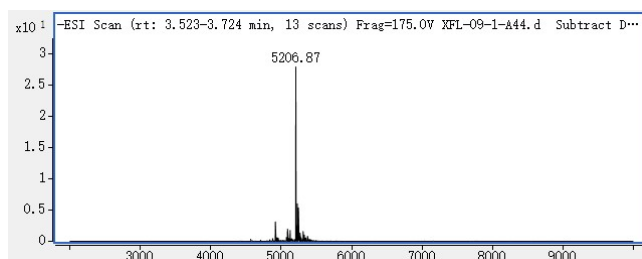

UPLC chromatograph and deconvoluted MS of **3as**.

**Conversion: 56%**

**Calculated Mass: 5203 Da; Found Mass: 5203 Da**

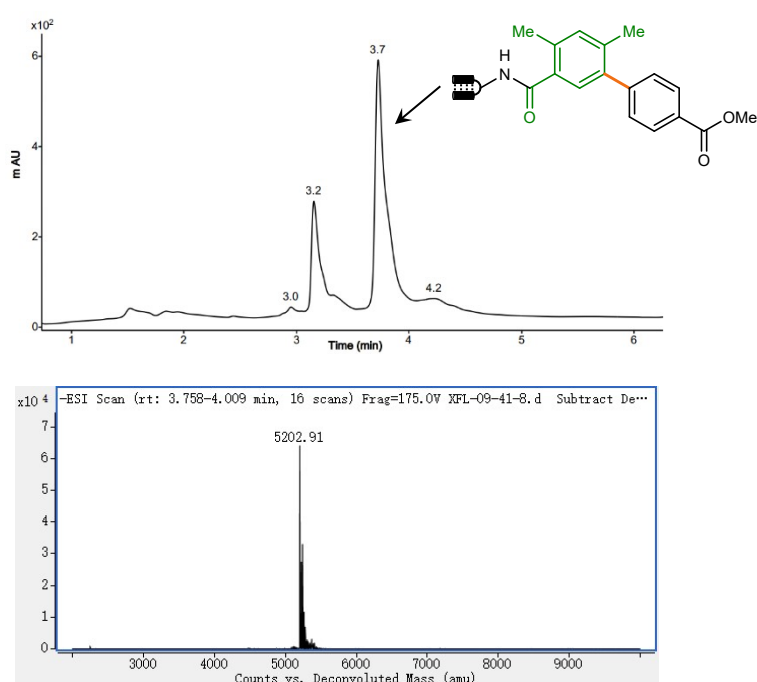

UPLC chromatograph and deconvoluted MS of **3at**.

**Conversion: 51%**

**Calculated Mass: 5207 Da; Found Mass: 5207 Da**

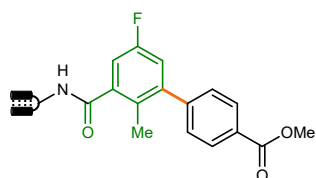

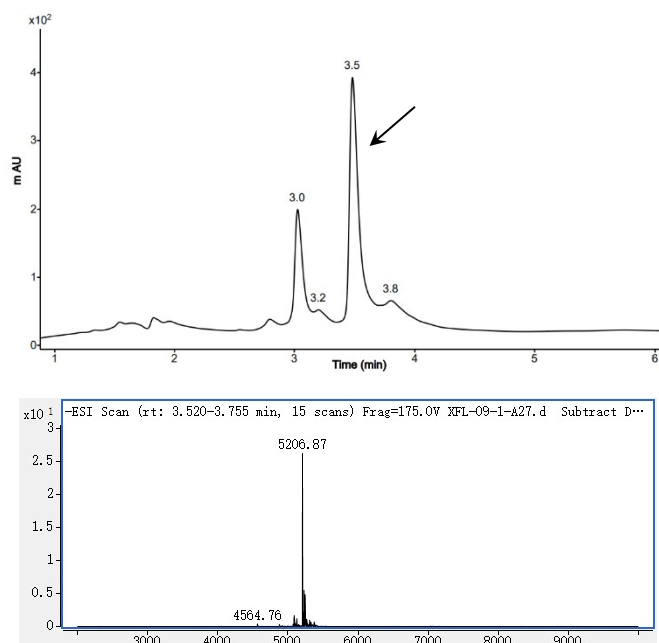

UPLC chromatogram and deconvoluted MS of **3au**.

**Conversion: 61%**

**Calculated Mass: 5205 Da; Found Mass: 5205 Da**

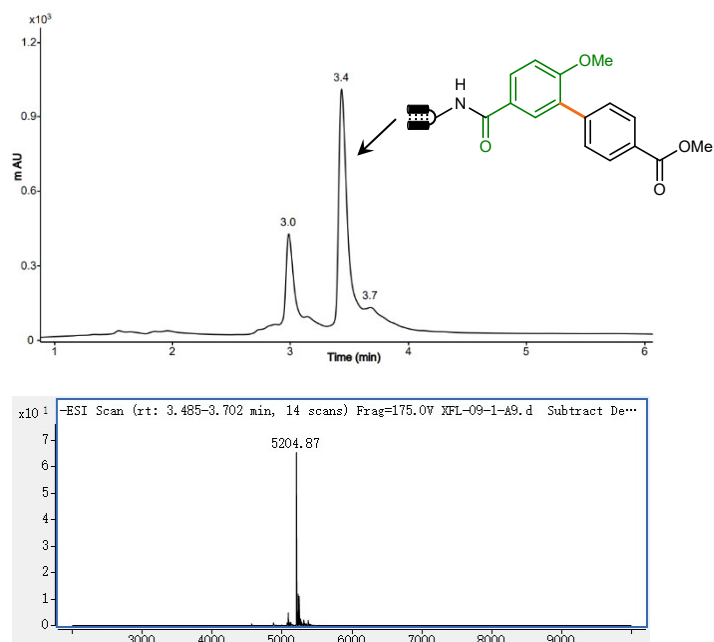

UPLC chromatogram and deconvoluted MS of **3av**.

**Conversion: 65%**

**Calculated Mass: 5193 Da; Found Mass: 5193 Da**

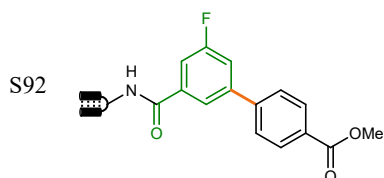



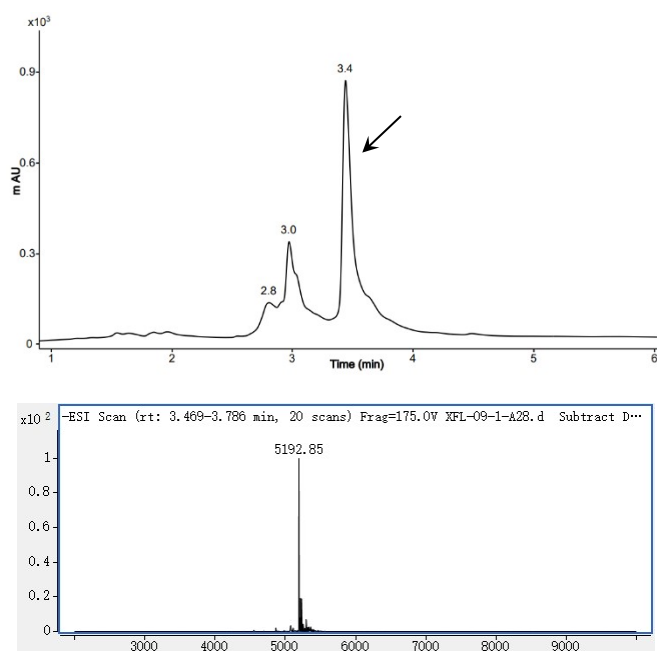

UPLC chromatogram and deconvoluted MS of **3aw**.

**Conversion: 54%**

**Calculated Mass: 5207 Da; Found Mass: 5207 Da**

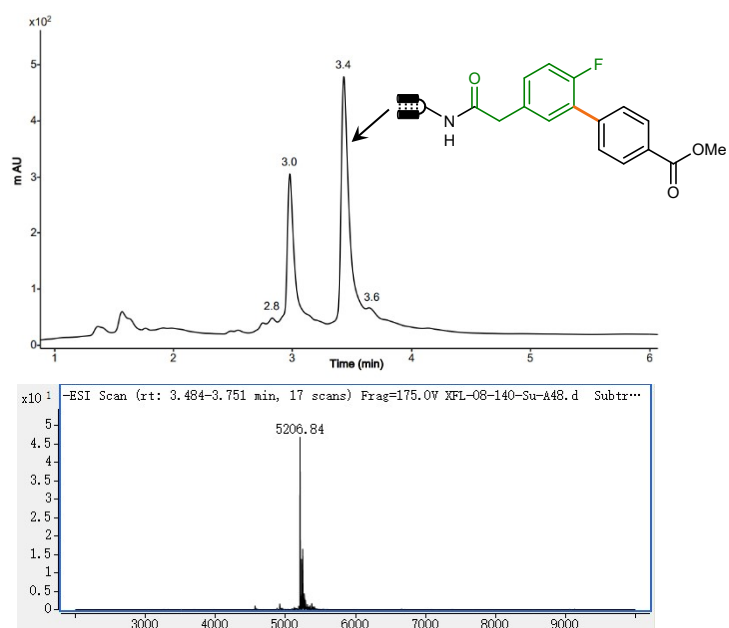

UPLC chromatogram and deconvoluted MS of **3ax**.

**Conversion: 67%**

**Calculated Mass: 5205 Da; Found Mass: 5205 Da**

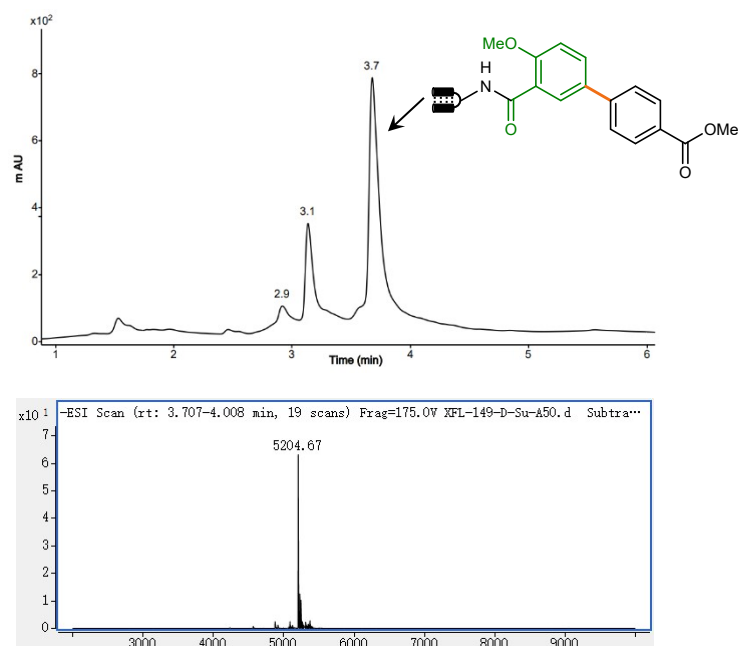

UPLC chromatograph and deconvoluted MS of **3ay**.

**Conversion: 56%**

**Calculated Mass: 5193 Da; Found Mass: 5193 Da**

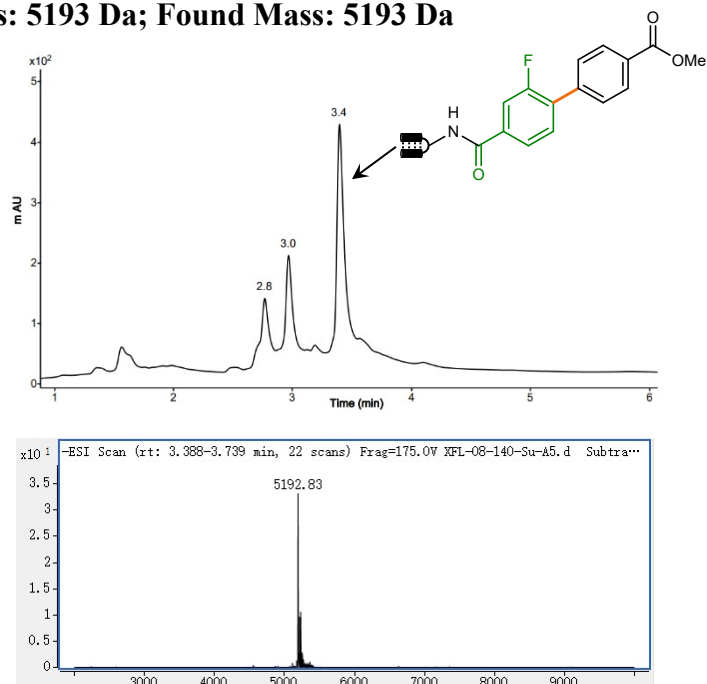

UPLC chromatograph and deconvoluted MS of **3az**.

**Conversion: 79%**

**Calculated Mass: 5189 Da; Found Mass: 5189 Da**

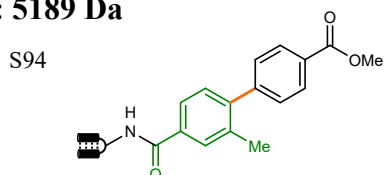

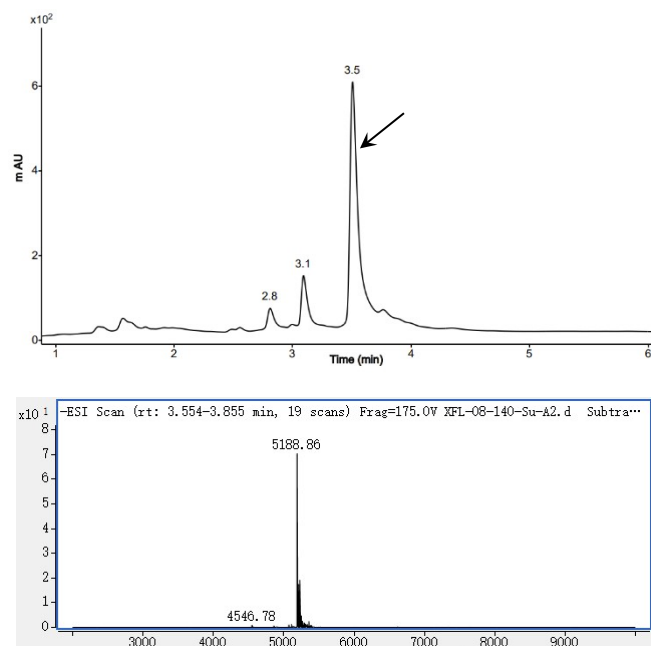

UPLC chromatograph and deconvoluted MS of **3ba**.

**Conversion: 51%**

**Calculated Mass: 5189 Da; Found Mass: 5189 Da**

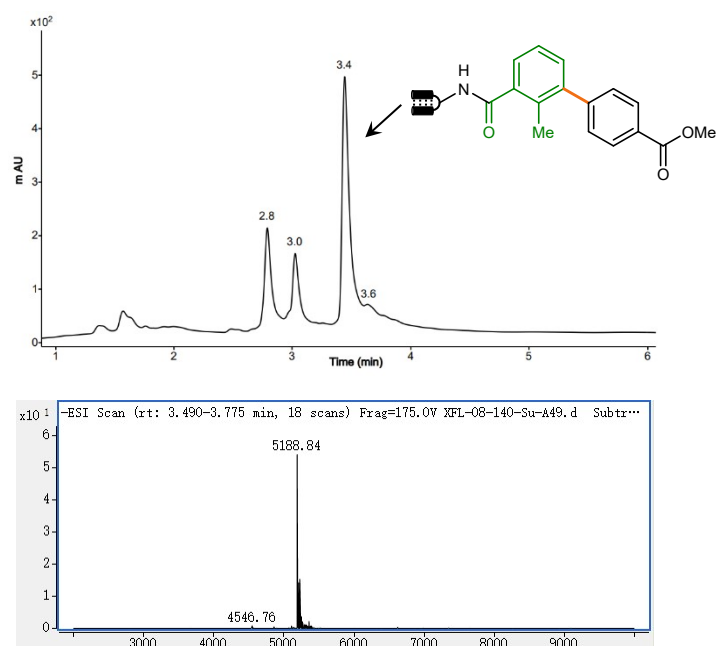

## 8.5 Substrate scope of olefins for the on-DNA Heck reaction with 1a

UPLC chromatograph and deconvoluted MS of **5a**.

**Conversion: 83%**

**Calculated Mass: 5143 Da; Found Mass: 5143 Da**

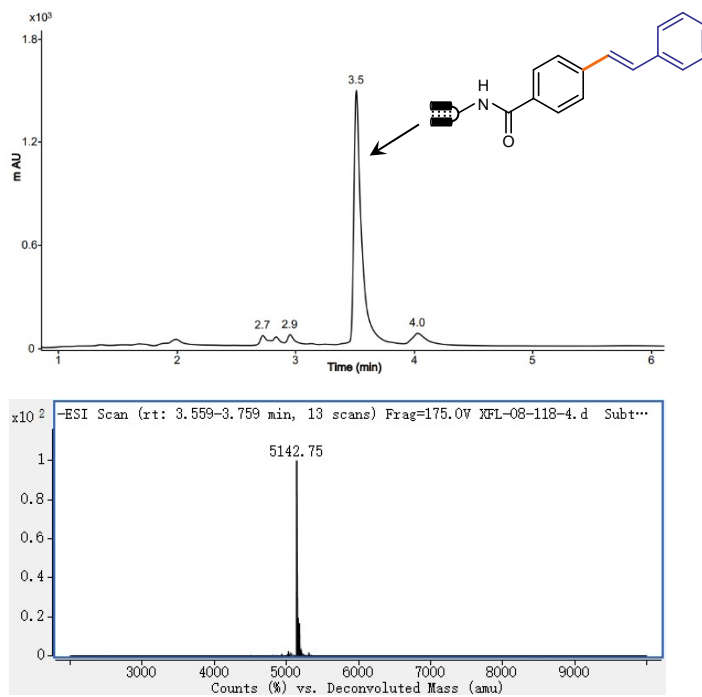

UPLC chromatograph and deconvoluted MS of **5b**.

**Conversion: 84%**

**Calculated Mass: 5157 Da; Found Mass: 5157 Da**

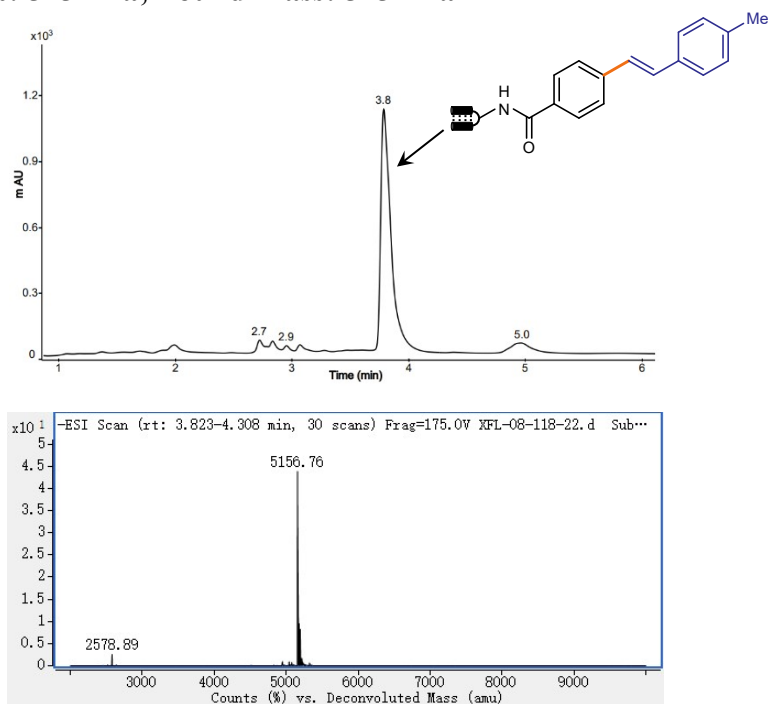

UPLC chromatograph and deconvoluted MS of **5c**.

**Conversion: 78%**

**Calculated Mass: 5173 Da; Found Mass: 5173 Da**

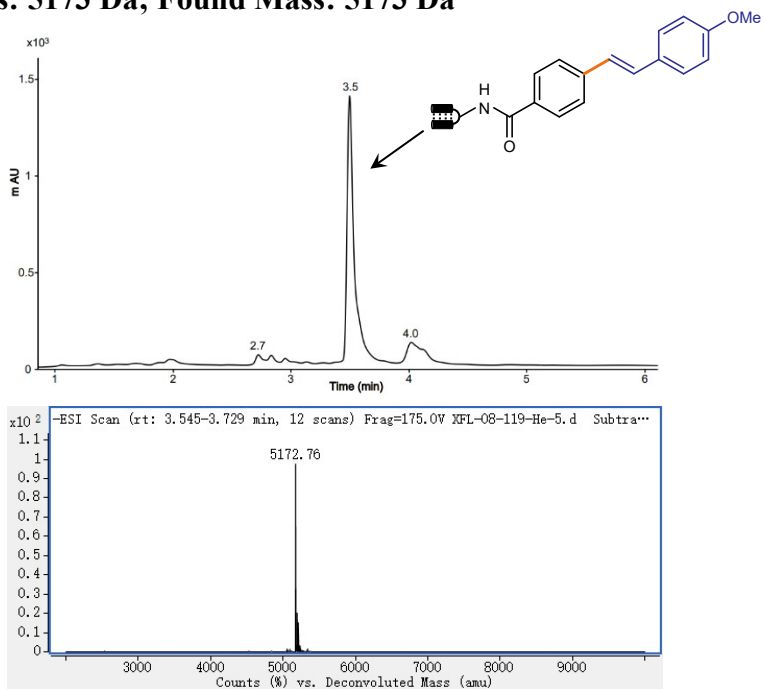

UPLC chromatograph and deconvoluted MS of **5d**.

**Conversion: 83%**

**Calculated Mass: 5161 Da; Found Mass: 5161 Da**

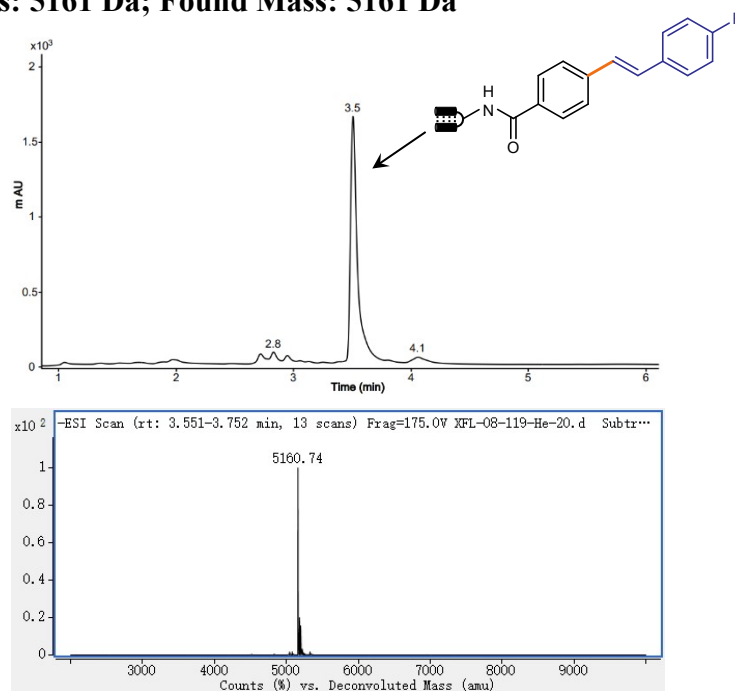

UPLC chromatograph and deconvoluted MS of **5e**.

**Conversion: 83%**

**Calculated Mass: 5177 Da; Found Mass: 5177 Da**

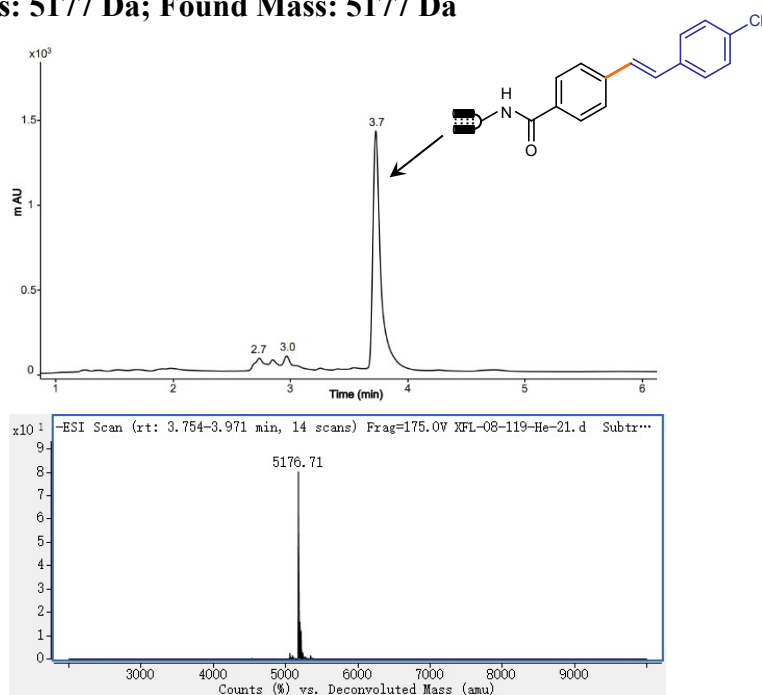

UPLC chromatograph and deconvoluted MS of **5f**.

**Conversion: 84%**

**Calculated Mass: 5222 Da; Found Mass: 5222 Da**

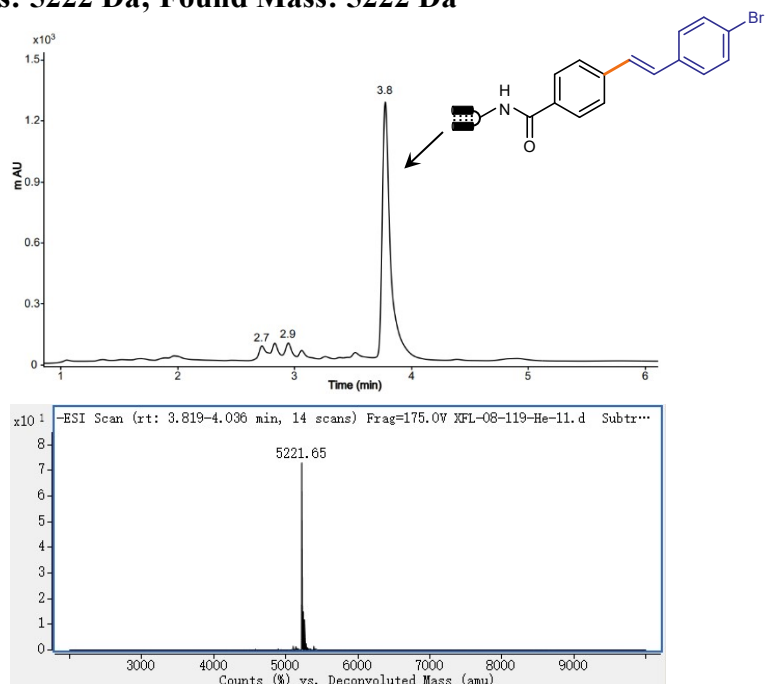

UPLC chromatograph and deconvoluted MS of **5g**.

**Conversion: 80%**

**Calculated Mass: 5188 Da; Found Mass: 5188 Da**

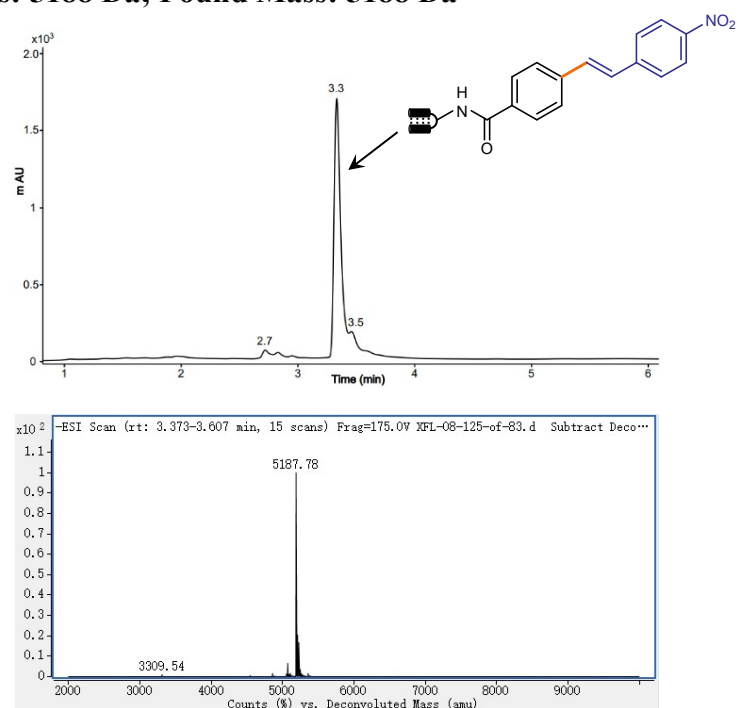

UPLC chromatograph and deconvoluted MS of **5h**.

**Conversion: 91%**

**Calculated Mass: 5157 Da; Found Mass: 5157 Da**

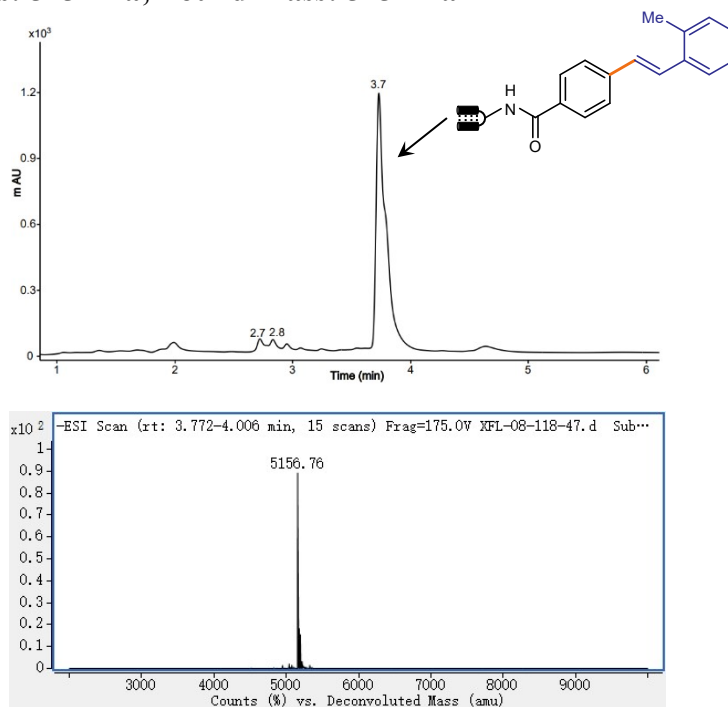

UPLC chromatograph and deconvoluted MS of **5i**.

**Conversion: 87%**

**Calculated Mass: 5157 Da; Found Mass: 5157 Da**

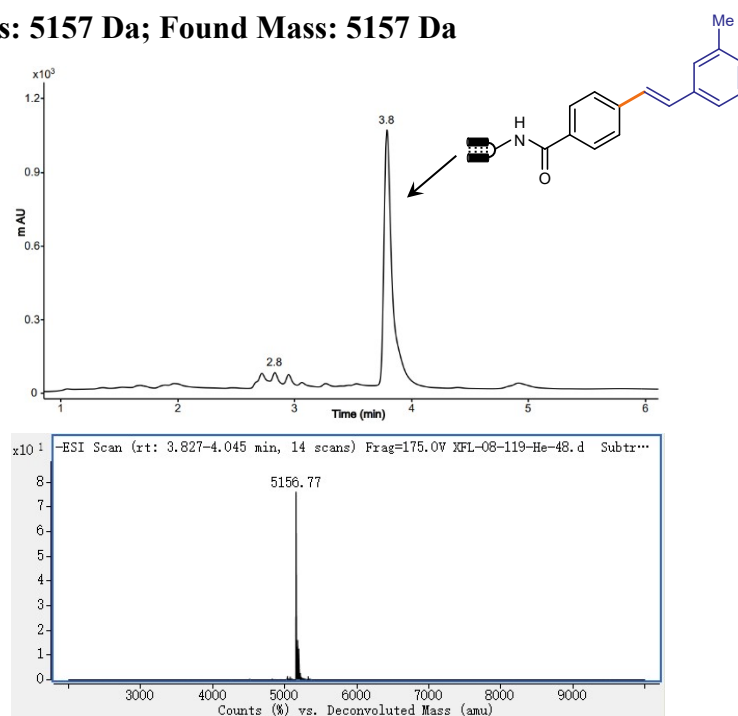



UPLC chromatograph and deconvoluted MS of **5j**.

**Conversion: 91%**

**Calculated Mass: 5222 Da; Found Mass: 5222 Da**

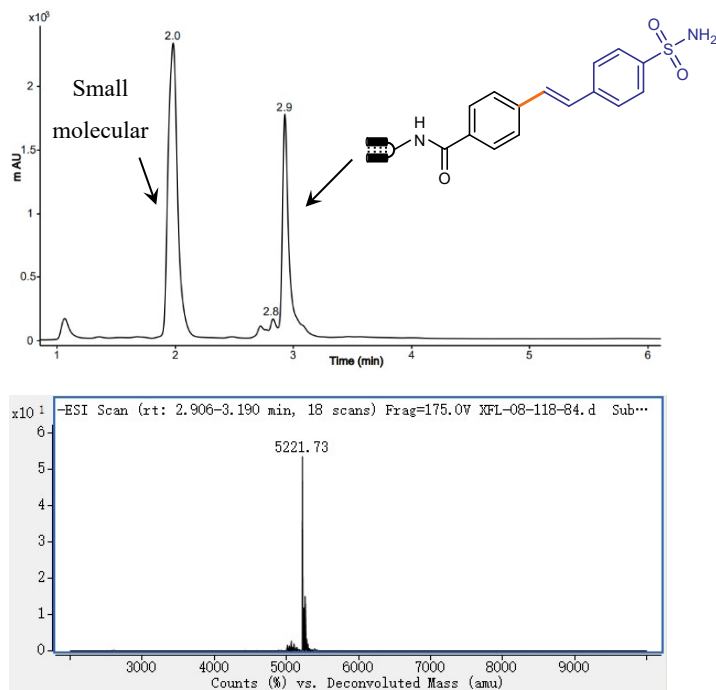

UPLC chromatograph and deconvoluted MS of **5k**.

**Conversion: 83%**

**Calculated Mass: 5168 Da; Found Mass: 5168 Da**

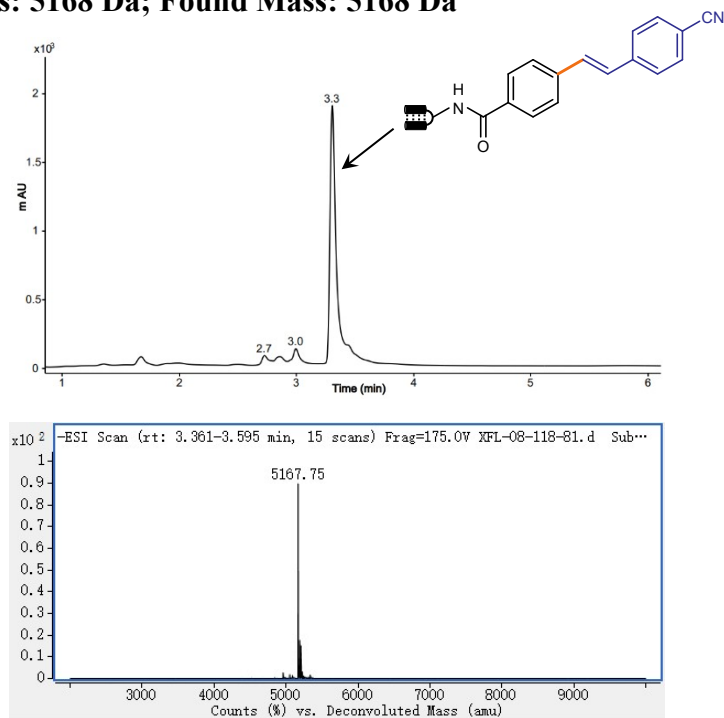

UPLC chromatograph and deconvoluted MS of **5l**.

**Conversion: 63%**

**Calculated Mass: 5159 Da; Found Mass: 5159 Da**

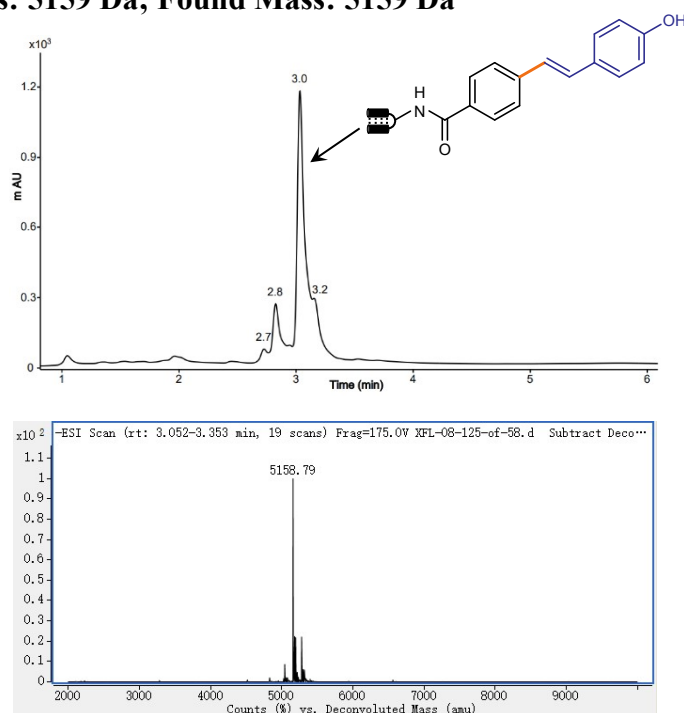

UPLC chromatograph and deconvoluted MS of **5m**.

**Conversion: 81%**

**Calculated Mass: 5187 Da; Found Mass: 5187 Da**

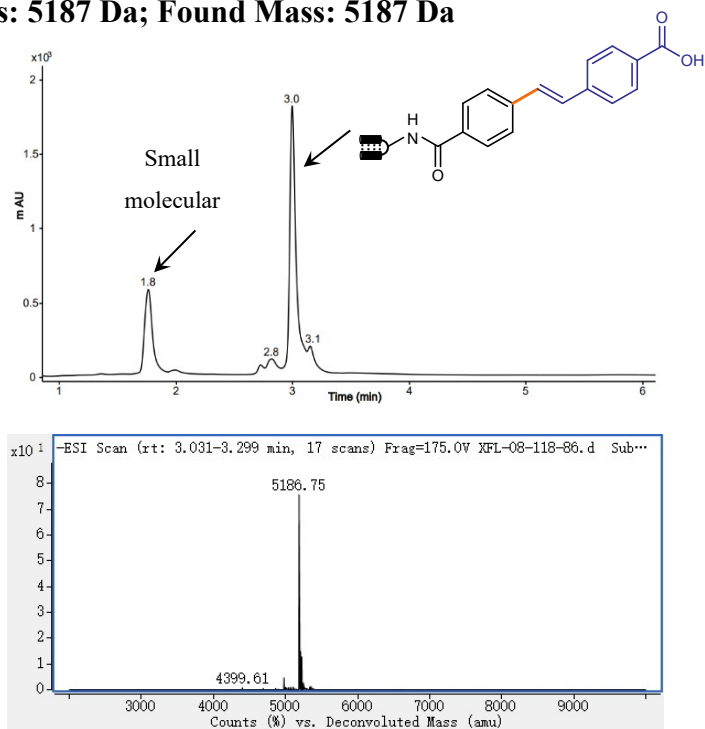

UPLC chromatograph and deconvoluted MS of **5n**.

**Conversion: 84%**

**Calculated Mass: 5171 Da; Found Mass: 5171 Da**

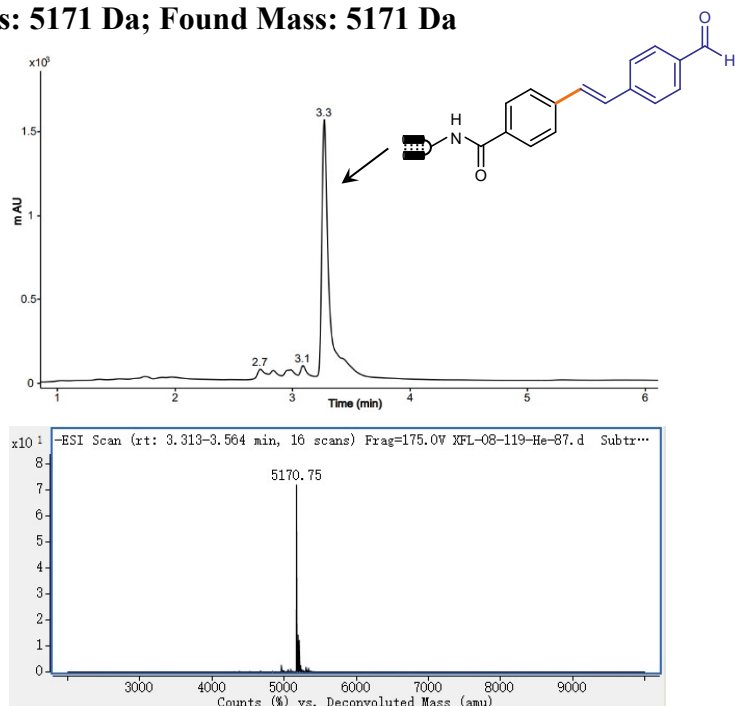

UPLC chromatograph and deconvoluted MS of **5o**.

**Conversion: 84%**

**Calculated Mass: 5201 Da; Found Mass: 5201 Da**

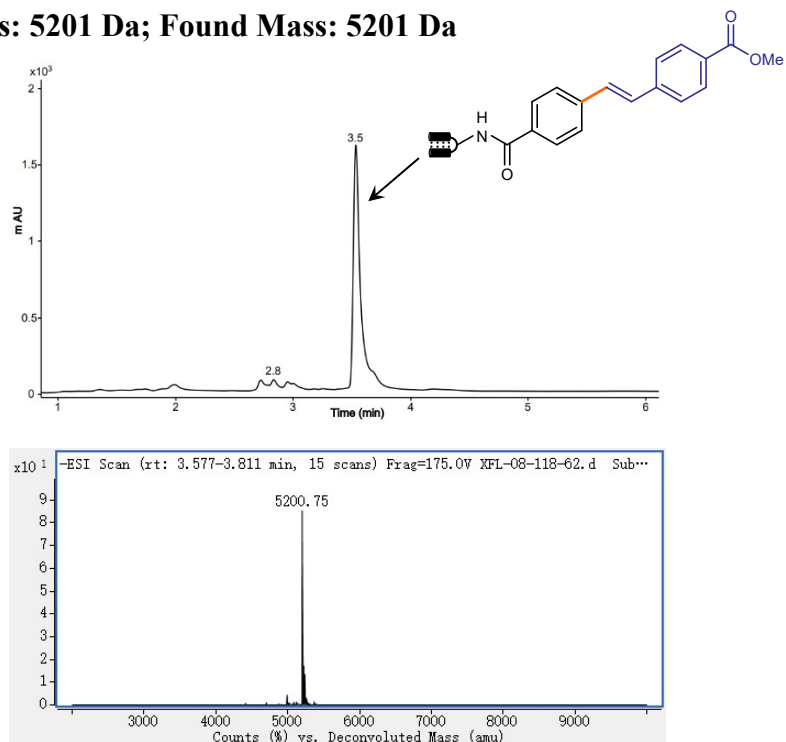

UPLC chromatograph and deconvoluted MS of **5p**.

**Conversion: 80%**

**Calculated Mass: 5201 Da; Found Mass: 5201 Da**

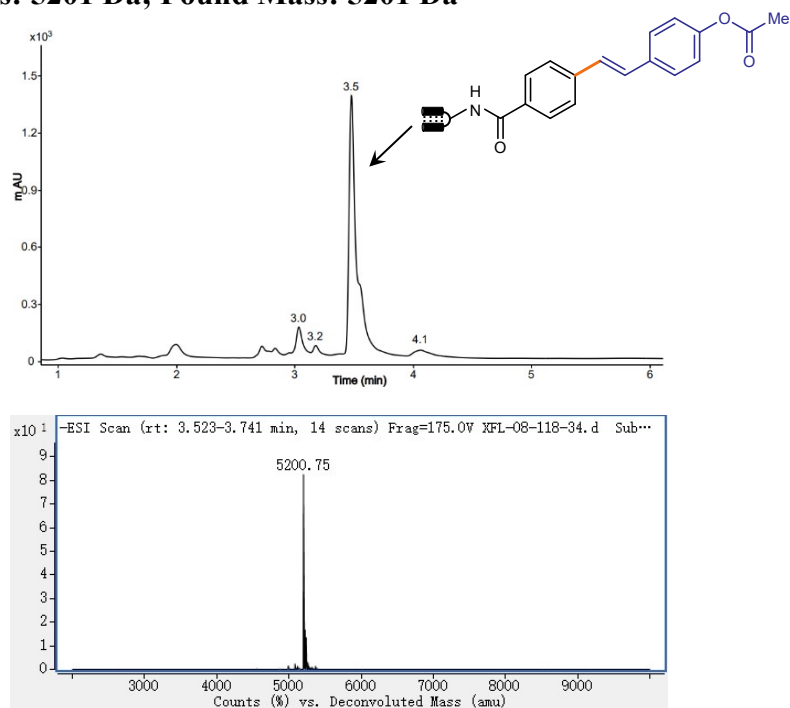

UPLC chromatograph and deconvoluted MS of **5q**.

**Conversion: 85%**

**Calculated Mass: 5329 Da; Found Mass: 5329 Da**

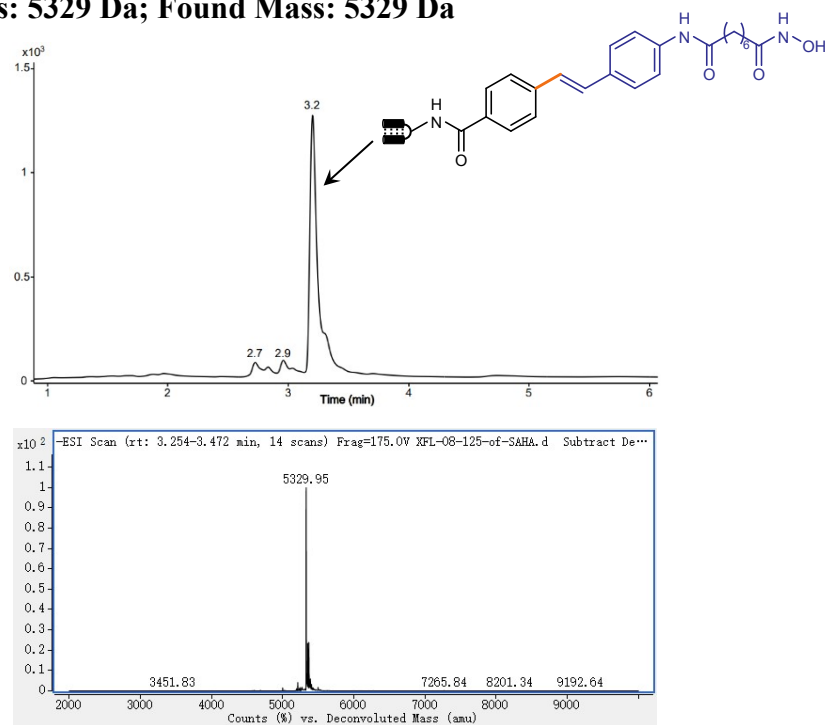

UPLC chromatograph and deconvoluted MS of **5r**.

**Conversion: 94%**

**Calculated Mass: 5125 Da; Found Mass: 5126 Da**

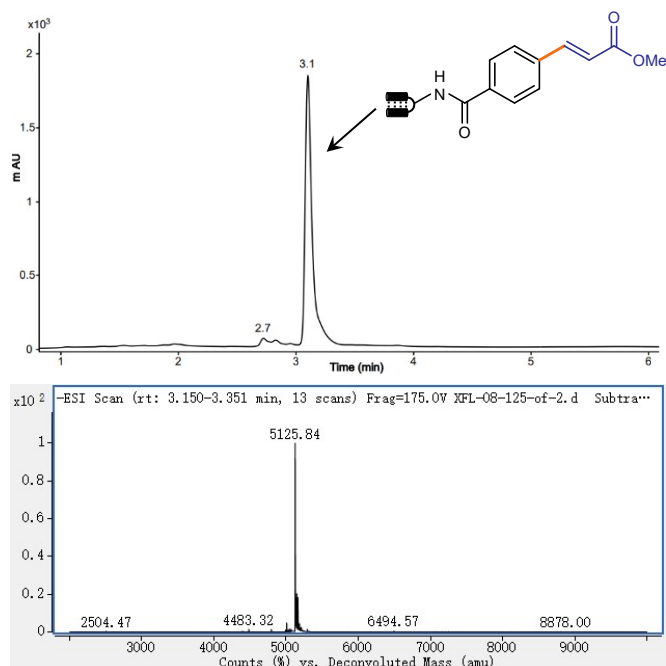

UPLC chromatograph and deconvoluted MS of **5s**.

**Conversion: 87%**

**Calculated Mass: 5180 Da; Found Mass: 5180 Da**

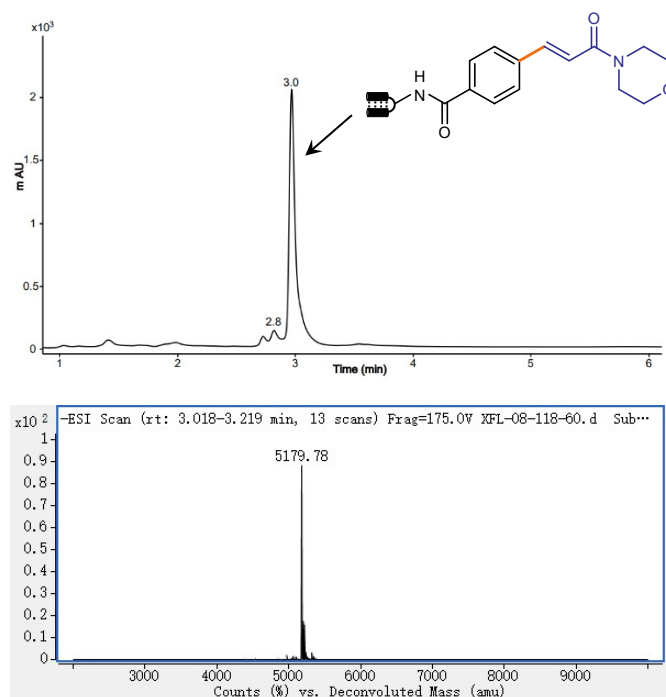

UPLC chromatograph and deconvoluted MS of **5t**.

**Conversion: 89%**

**Calculated Mass: 5180 Da; Found Mass: 5180 Da**

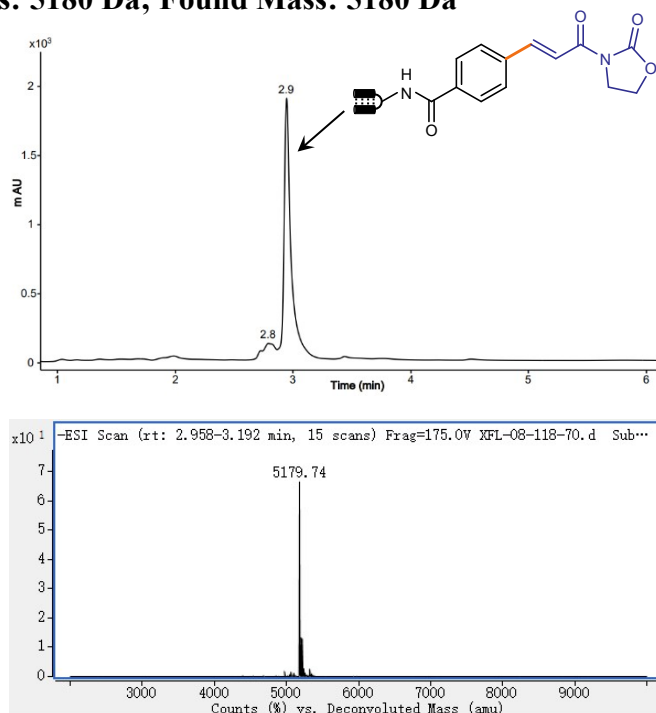

UPLC chromatograph and deconvoluted MS of **5u**.

**Conversion: 82%**

**Calculated Mass: 5139 Da; Found Mass: 5139 Da**

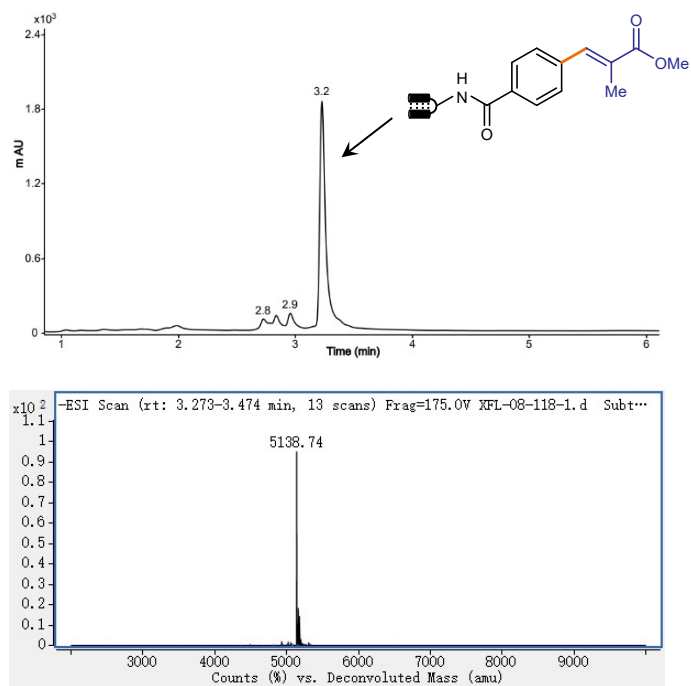

UPLC chromatograph and deconvoluted MS of **5v**.

**Conversion: 77%**

**Calculated Mass: 5139 Da; Found Mass: 5139 Da**

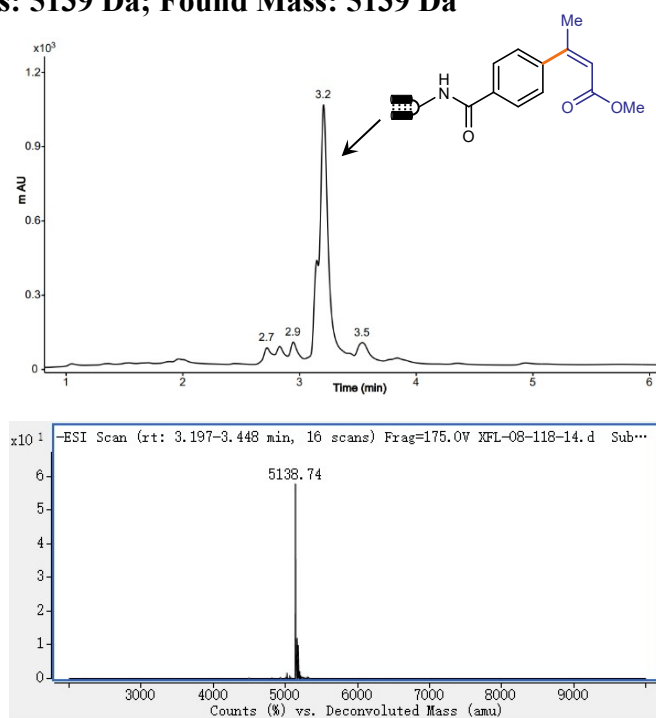

UPLC chromatograph and deconvoluted MS of **5w**.

**Conversion: 88%**

**Calculated Mass: 5203 Da; Found Mass: 5203 Da**

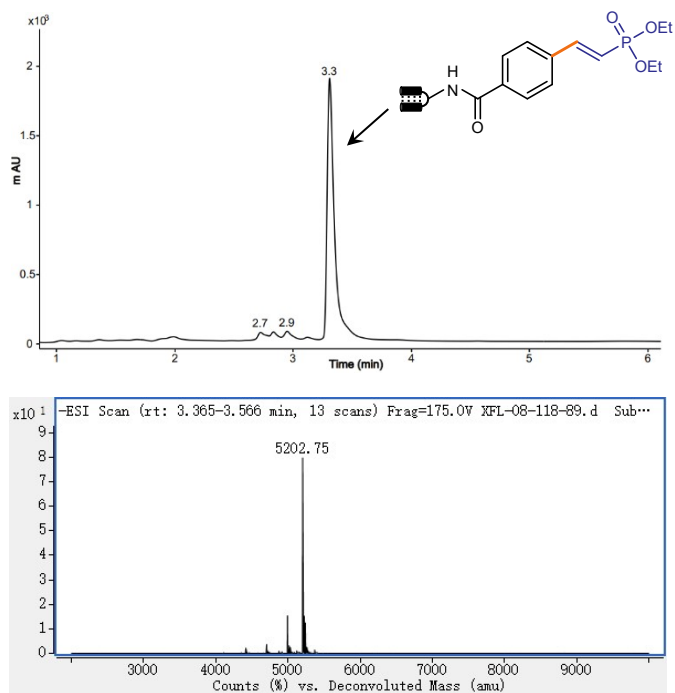

UPLC chromatograph and deconvoluted MS of **5x**.

**Conversion: 86%**

**Calculated Mass: 5149 Da; Found Mass: 5149 Da**

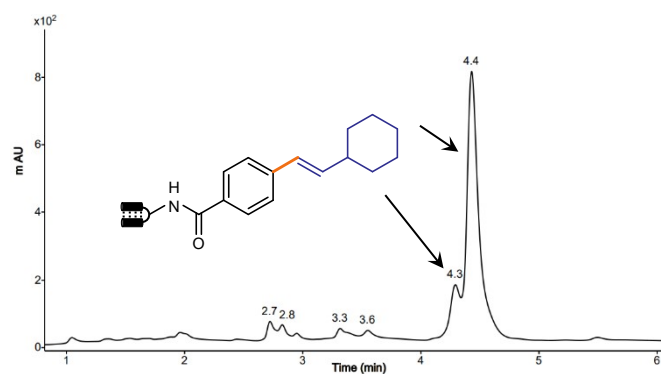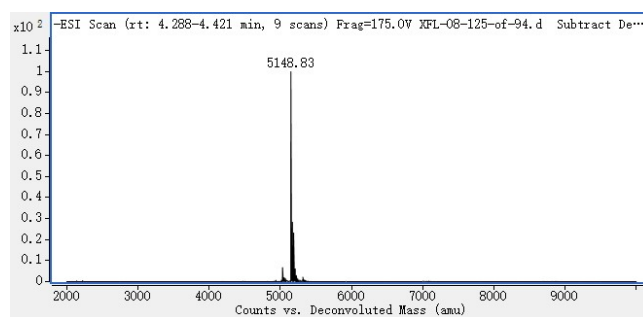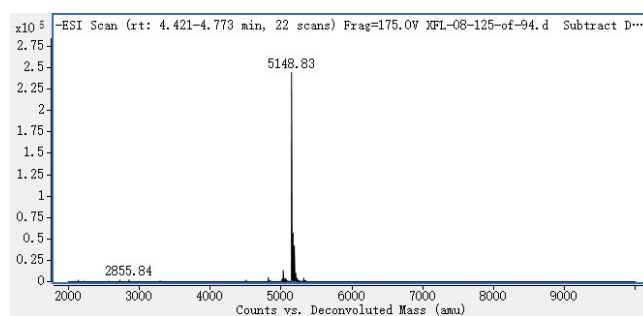



UPLC chromatograph and deconvoluted MS of **5y**.

**Conversion: 90%**

**Calculated Mass: 5157 Da; Found Mass: 5157 Da**

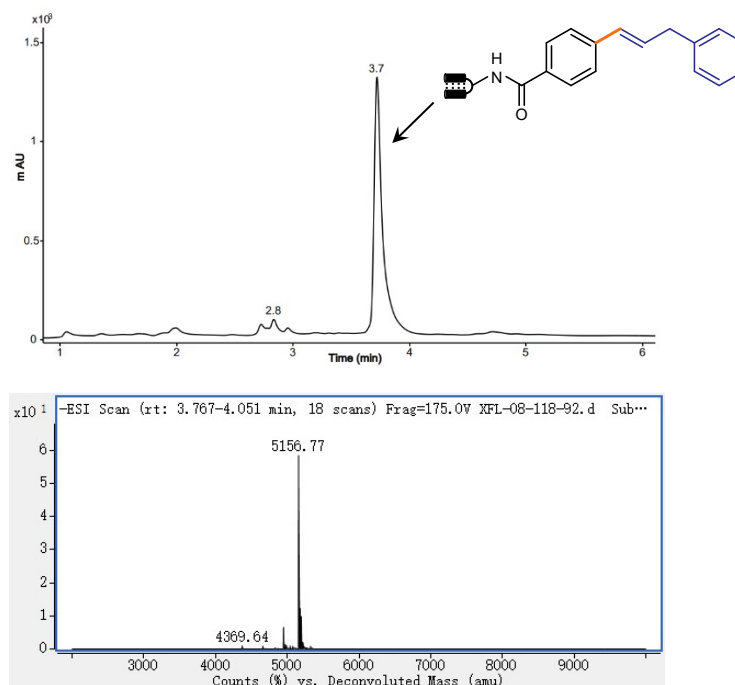

UPLC chromatograph and deconvoluted MS of **5z**.

**Conversion: 88%**

**Calculated Mass: 5139 Da; Found Mass: 5139 Da**

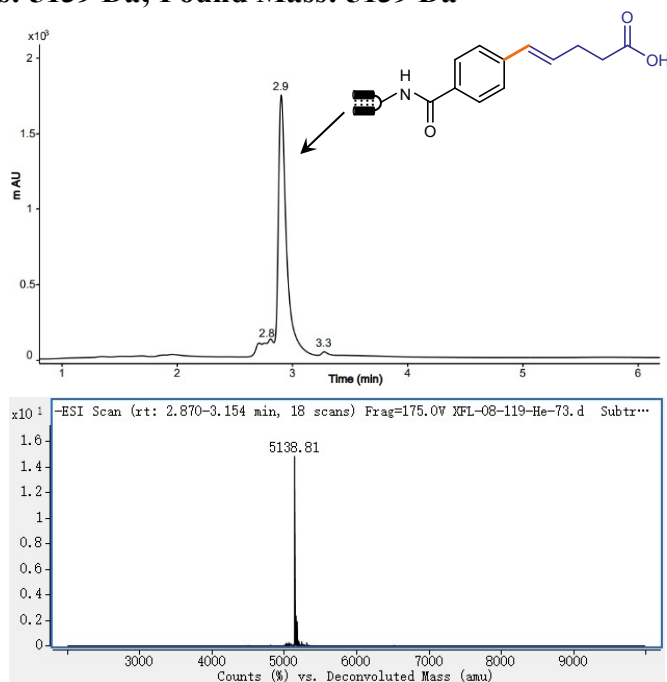

UPLC chromatograph and deconvoluted MS of **5aa**.

**Conversion: 85%**

**Calculated Mass: 5177 Da; Found Mass: 5177 Da**

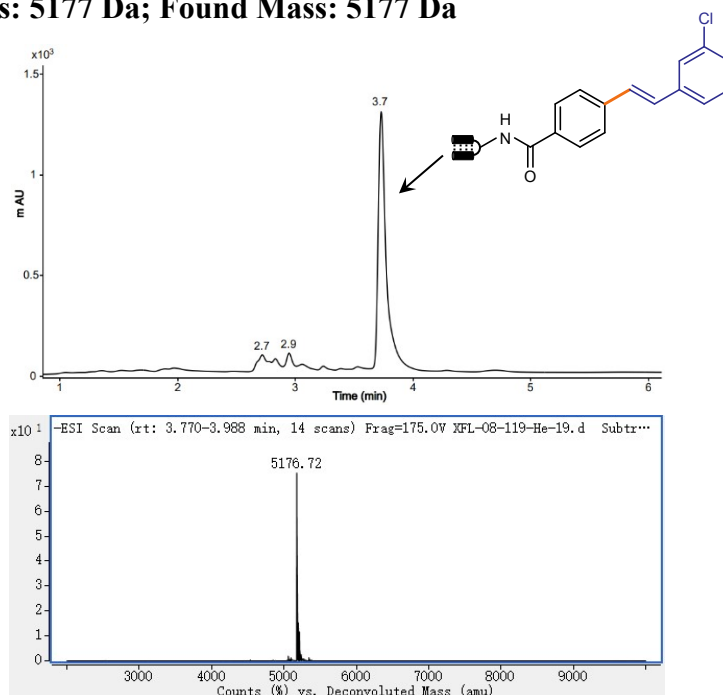

UPLC chromatograph and deconvoluted MS of **5ab**.

**Conversion: 91%**

**Calculated Mass: 5177 Da; Found Mass: 5177 Da**

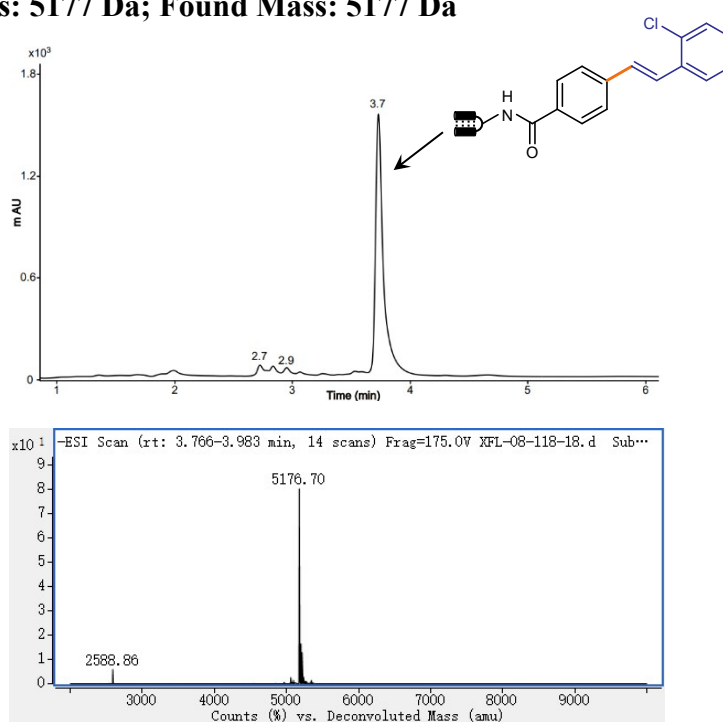

UPLC chromatograph and deconvoluted MS of **5ac**.

**Conversion: 67%**

**Calculated Mass: 5222 Da; Found Mass: 5222 Da**

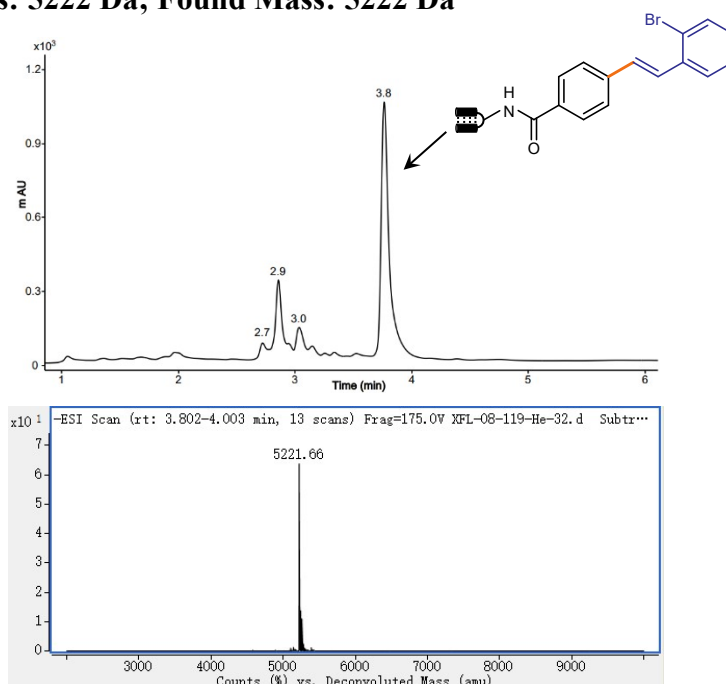

UPLC chromatograph and deconvoluted MS of **5ad**.

**Conversion: 83%**

**Calculated Mass: 5222 Da; Found Mass: 5222 Da**

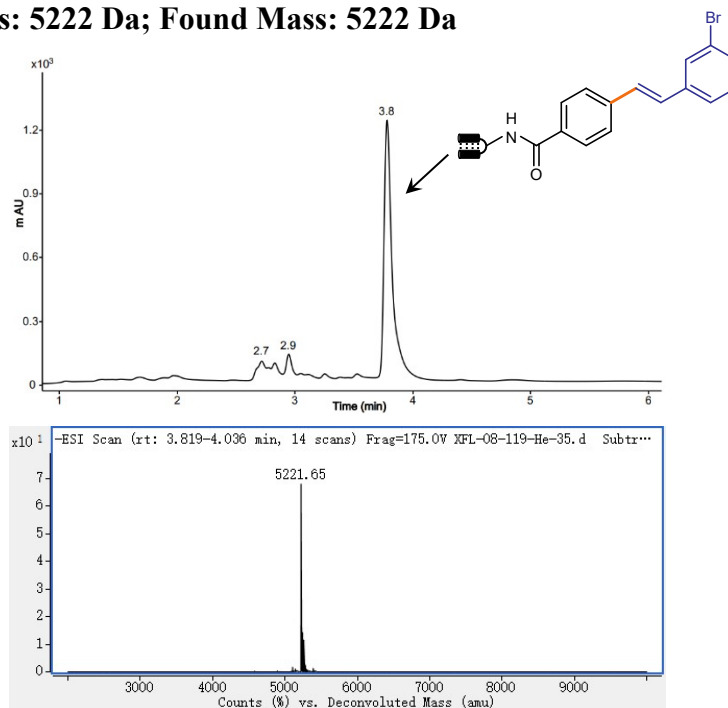

UPLC chromatograph and deconvoluted MS of **5ae**.

**Conversion: 75%**

**Calculated Mass: 5199 Da; Found Mass: 5199 Da**

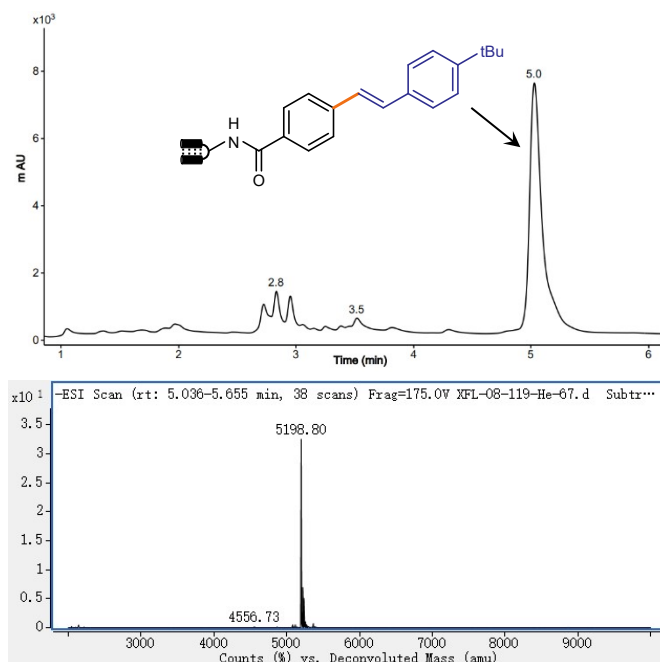

UPLC chromatograph and deconvoluted MS of **5af**.

**Conversion: 89%**

**Calculated Mass: 5110 Da; Found Mass: 5110 Da**

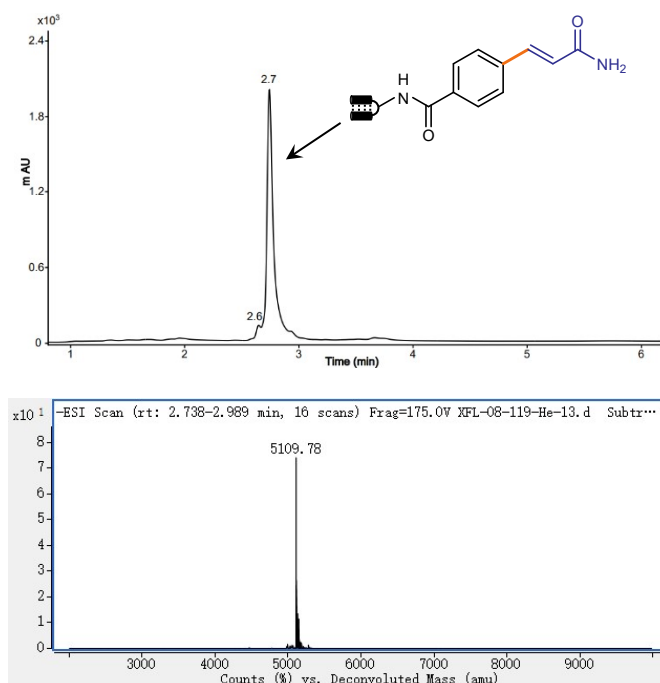

UPLC chromatograph and deconvoluted MS of **5ag**.

**Conversion: 90%**

**Calculated Mass: 5166 Da; Found Mass: 5166 Da**

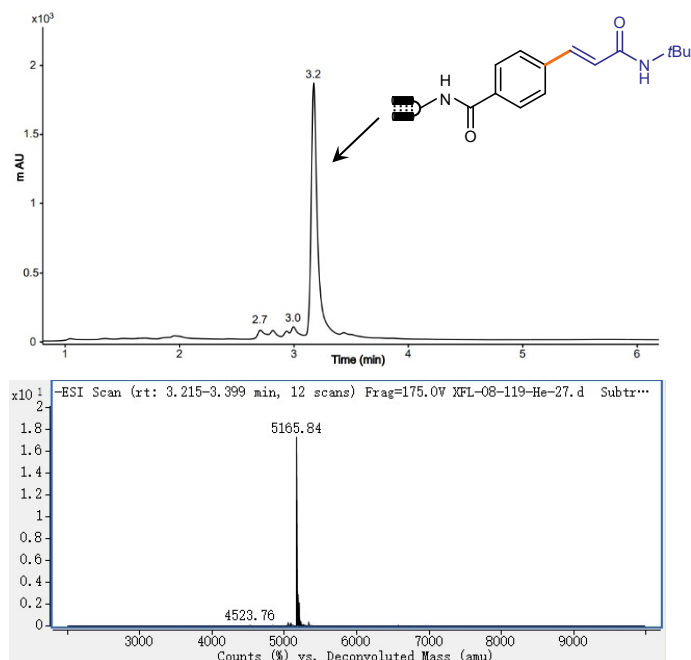

UPLC chromatograph and deconvoluted MS of **5ah**.

**Conversion: 85%**

**Calculated Mass: 5152 Da; Found Mass: 5152 Da**

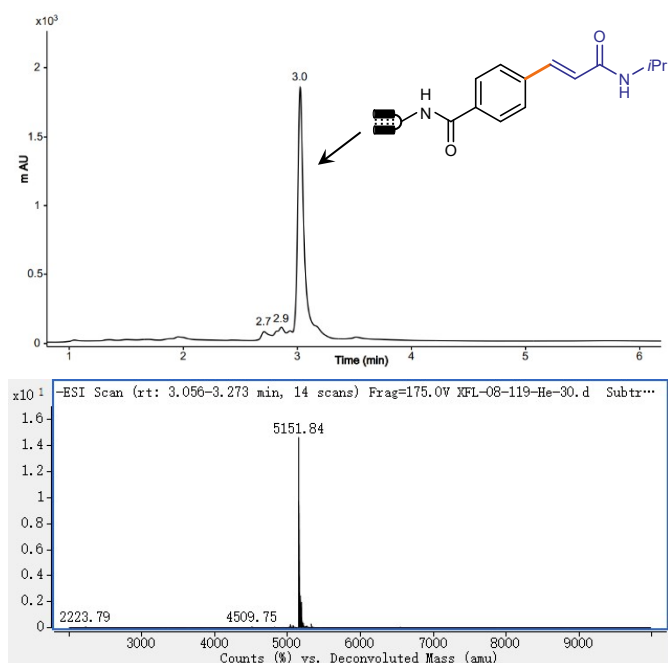

UPLC chromatograph and deconvoluted MS of **5ai**.

**Conversion: 87%**

**Calculated Mass: 5187 Da; Found Mass: 5187 Da**

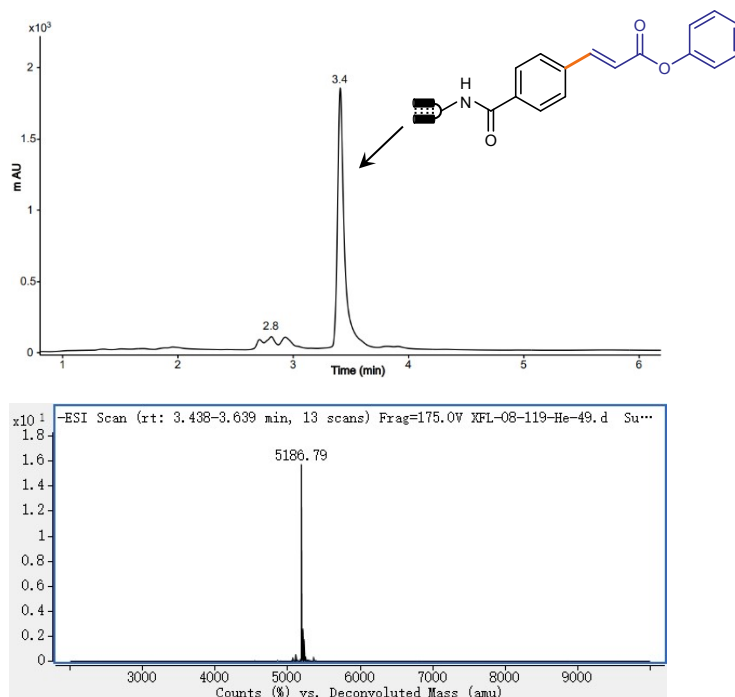

UPLC chromatograph and deconvoluted MS of **5aj**

**Conversion: 87%**

**Calculated Mass: 5186 Da; Found Mass: 5186 Da**

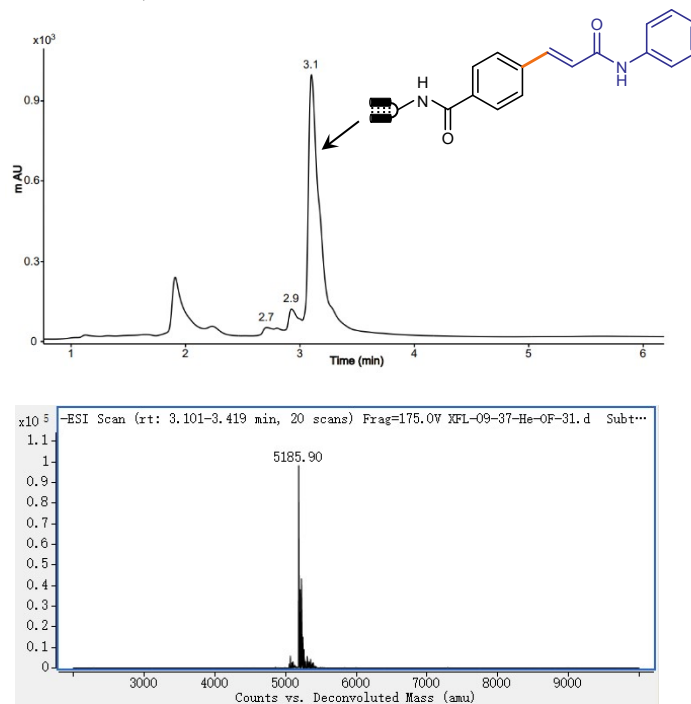

UPLC chromatograph and deconvoluted MS of **5ak**.

**Conversion: 80%**

**Calculated Mass: 5256 Da; Found Mass: 5256 Da**

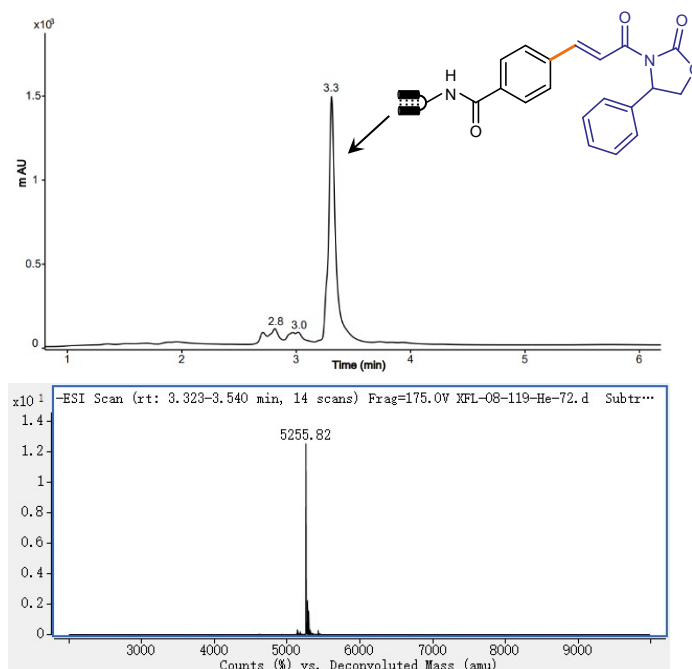

UPLC chromatograph and deconvoluted MS of **5al**.

**Conversion: 83%**

**Calculated Mass: 5246 Da; Found Mass: 5246 Da**

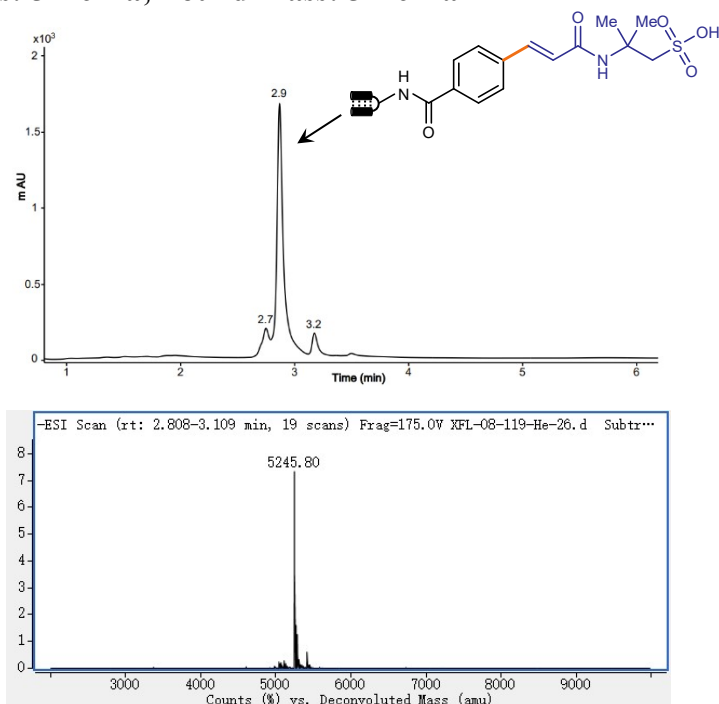

UPLC chromatograph and deconvoluted MS of **5am**.

**Conversion: 87%**

**Calculated Mass: 5138 Da; Found Mass: 5138 Da**

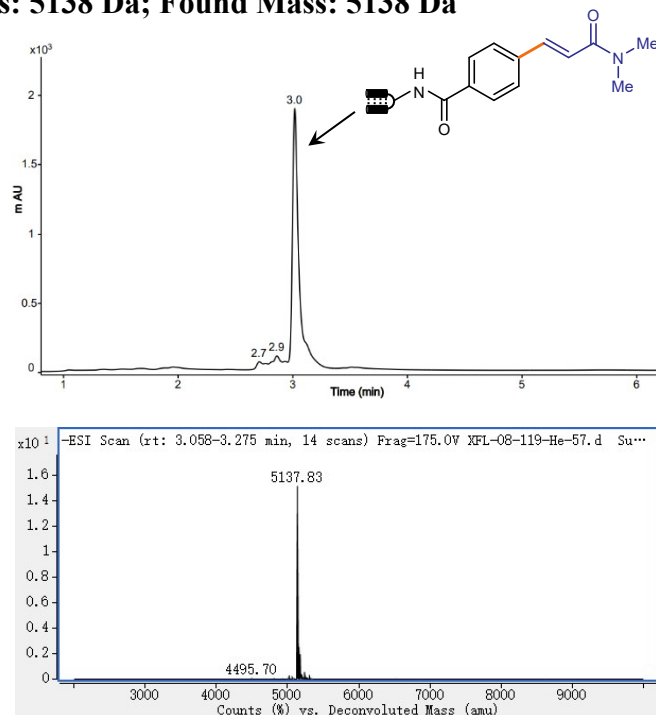

UPLC chromatograph and deconvoluted MS of **5an**.

**Conversion: 87%**

**Calculated Mass: 5166 Da; Found Mass: 5166 Da**

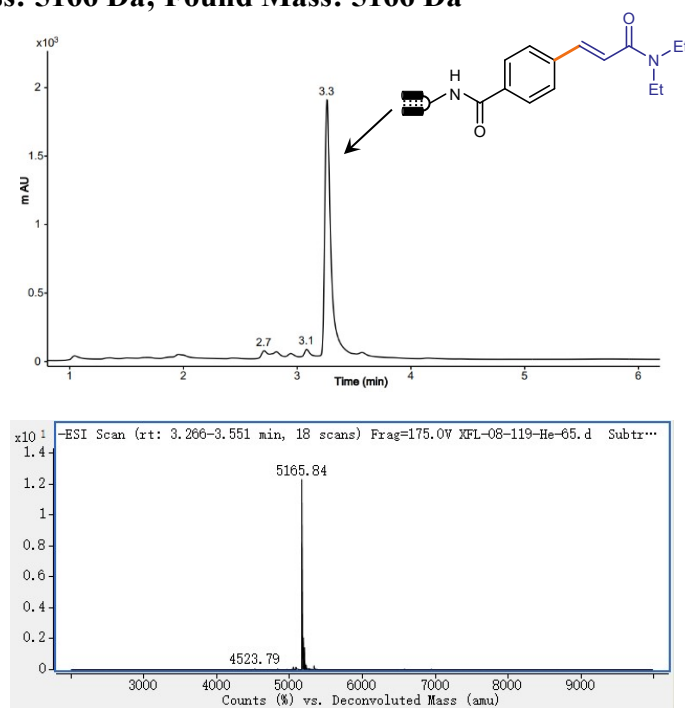



UPLC chromatograph and deconvoluted MS of **5ao**.

**Conversion: 86%**

**Calculated Mass: 5169 Da; Found Mass: 5169 Da**

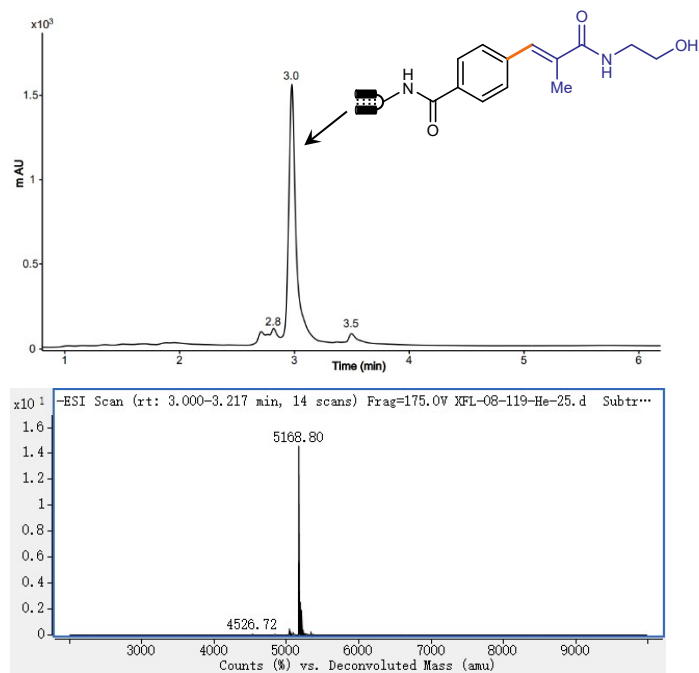

UPLC chromatograph and deconvoluted MS of **5ap**.

**Conversion: 68%**

**Calculated Mass: 5181 Da; Found Mass: 5181 Da**

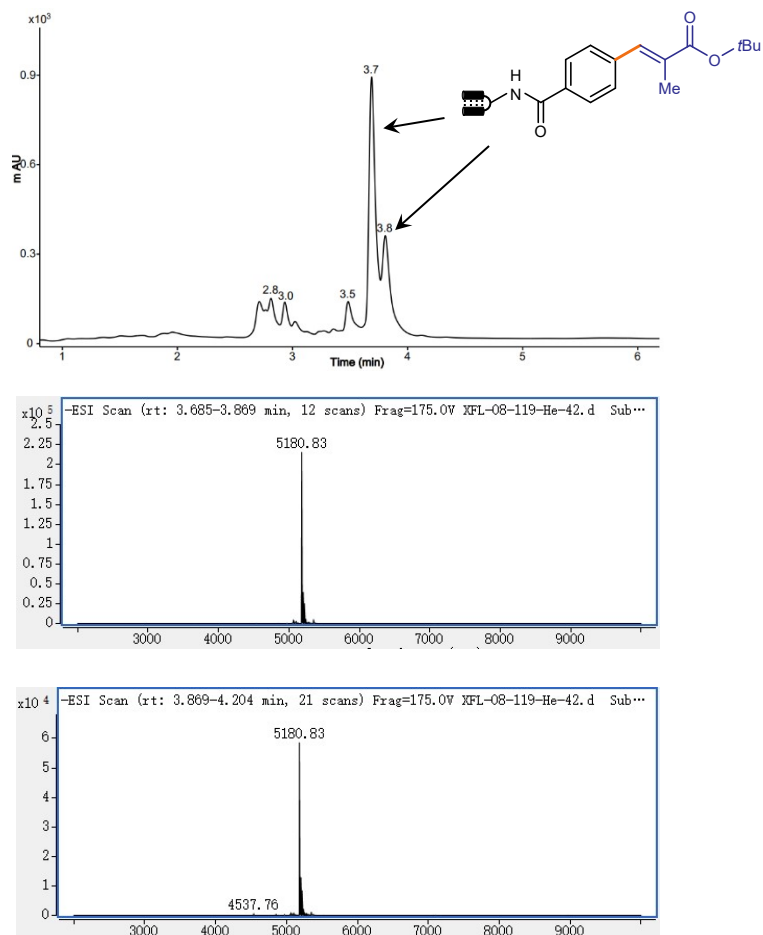

UPLC chromatograph and deconvoluted MS of **5aq**.

**Conversion: 62%**

**Calculated Mass: 5109 Da; Found Mass: 5109 Da**

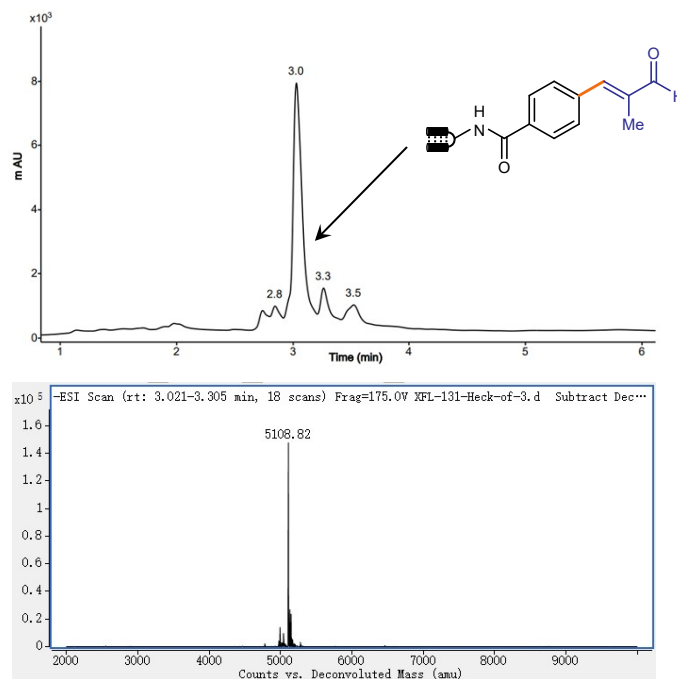

UPLC chromatograph and deconvoluted MS of **5ar**.

**Conversion: 82%**

**Calculated Mass: 5166 Da; Found Mass: 5166 Da**

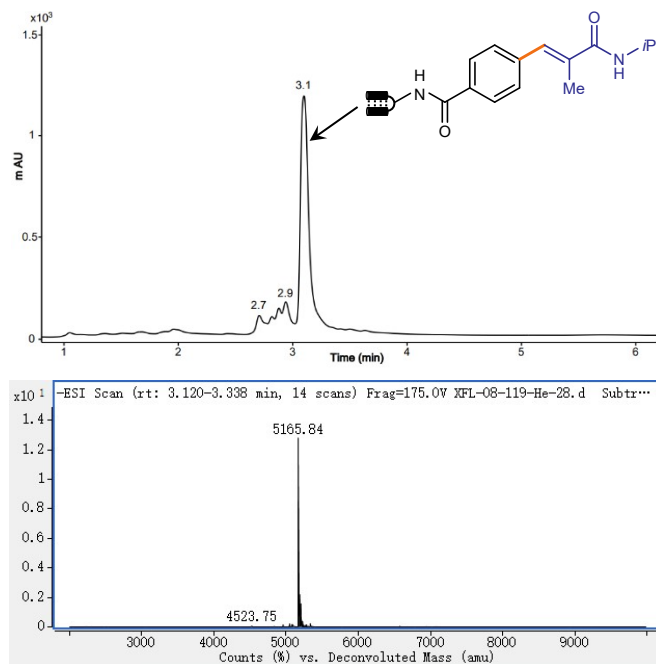

UPLC chromatograph and deconvoluted MS of **5as**.

**Conversion: 58%**

**Calculated Mass: 5153 Da; Found Mass: 5153 Da**

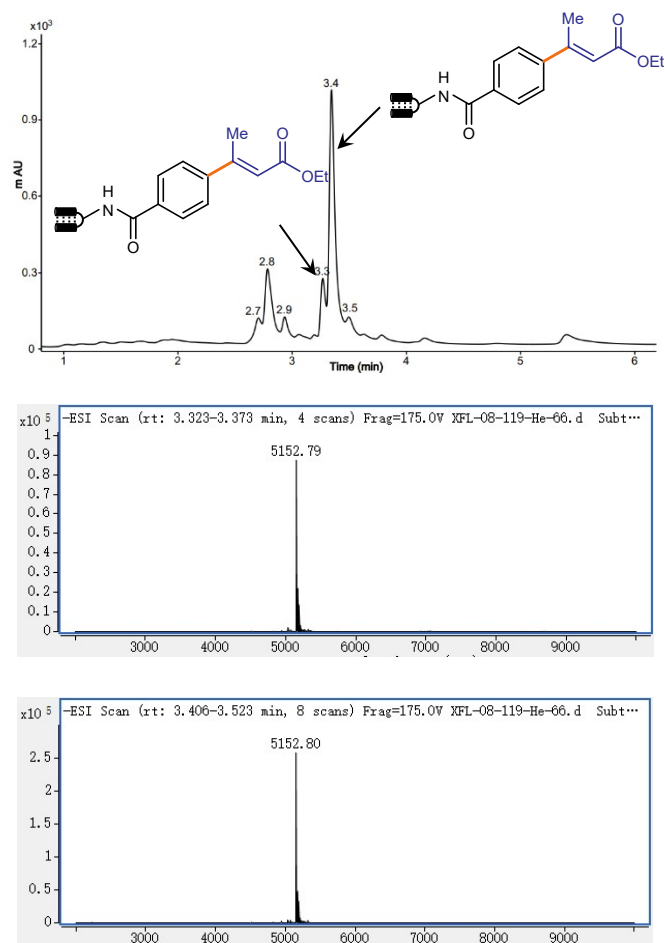

UPLC chromatograph and deconvoluted MS of **5at**.

**Conversion: 84%**

**Calculated Mass: 5147 Da; Found Mass: 5147 Da**

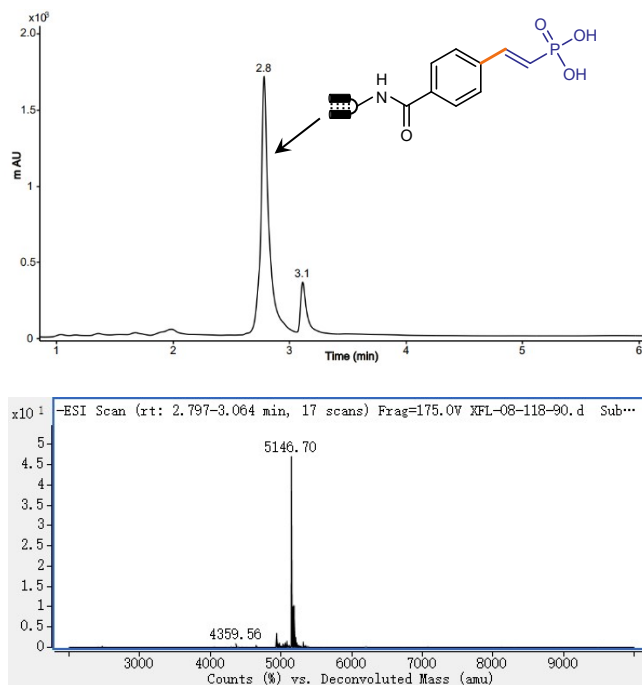

UPLC chromatograph and deconvoluted MS of **5au**.

**Conversion: 82%**

**Calculated Mass: 5245 Da; Found Mass: 5245 Da**

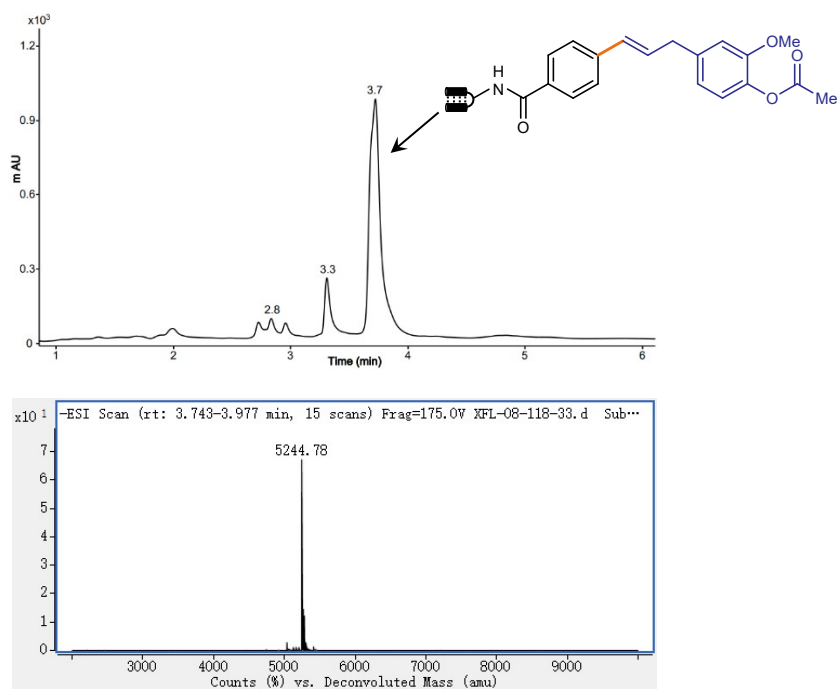

UPLC chromatograph and deconvoluted MS of **5av**.

**Conversion: 78%**

**Calculated Mass: 5157 Da; Found Mass: 5157 Da**

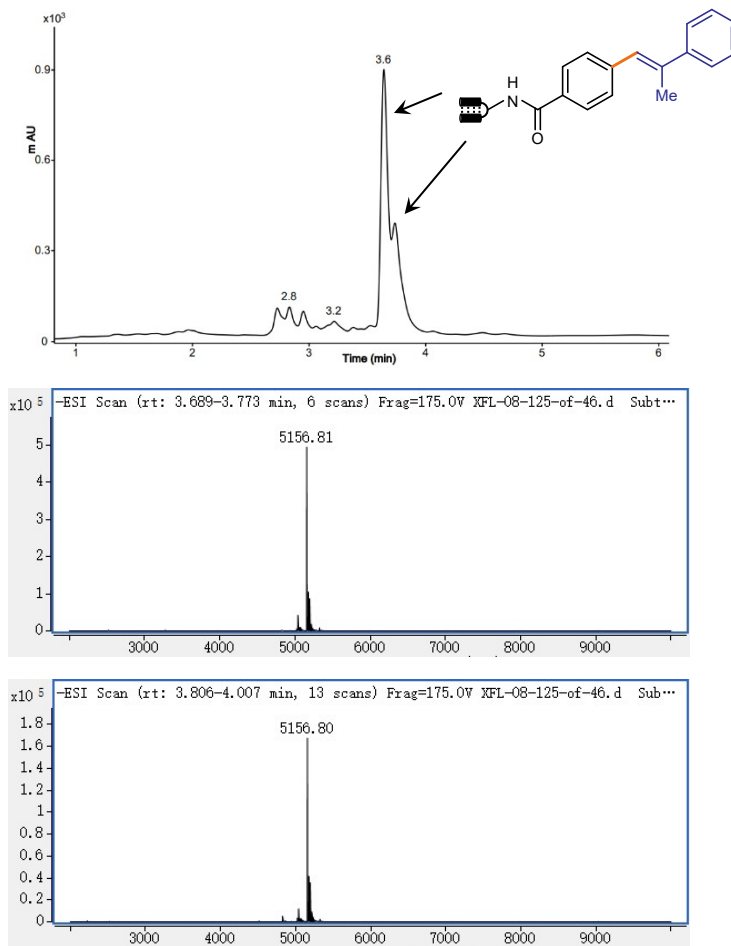

## 8.6 Substrate scope of DNA-conjugated arylamines for the on-DNA Heck reaction with **4o**

UPLC chromatograph and deconvoluted MS of **5o**.

**Conversion: 86%**

**Calculated Mass: 5201 Da; Found Mass: 5201 Da**

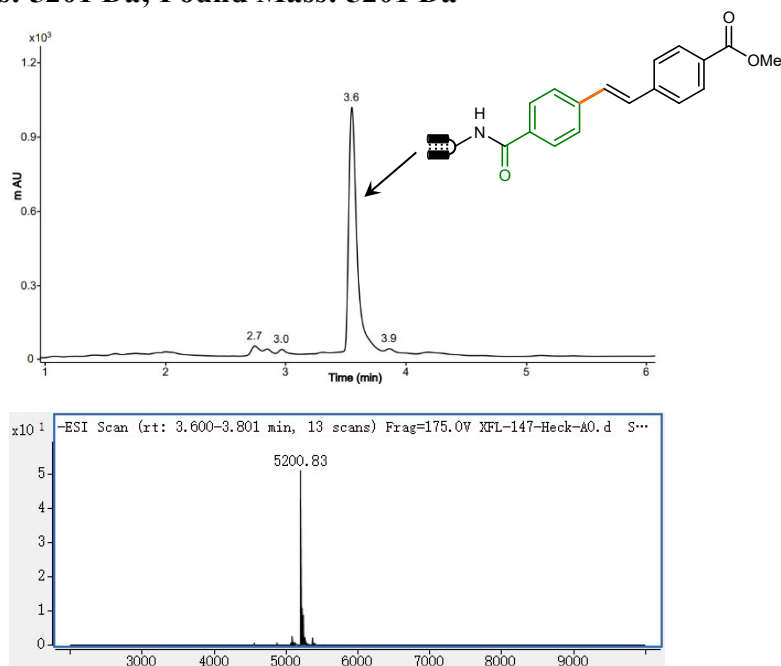

UPLC chromatograph and deconvoluted MS of **5aw**.

**Conversion: 90%**

**Calculated Mass: 5201 Da; Found Mass: 5201 Da**

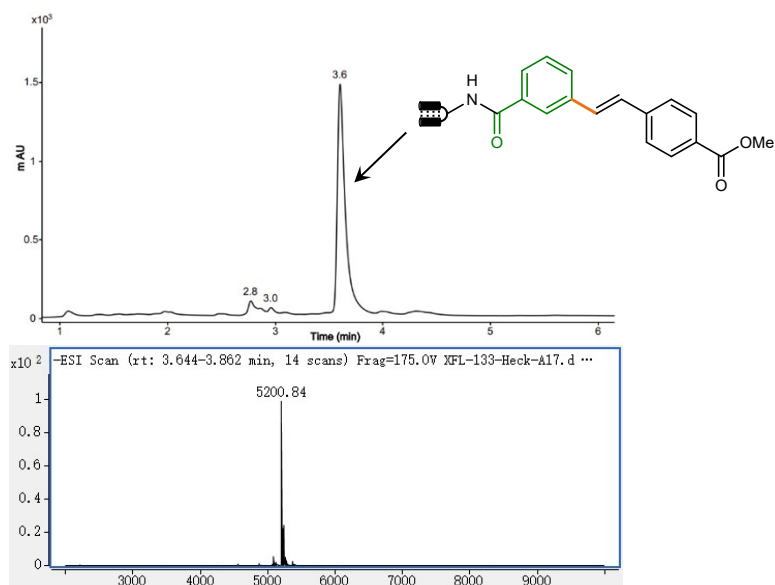

UPLC chromatograph and deconvoluted MS of **5ax**.

**Conversion: 77%**

**Calculated Mass: 5215 Da; Found Mass: 5215 Da**

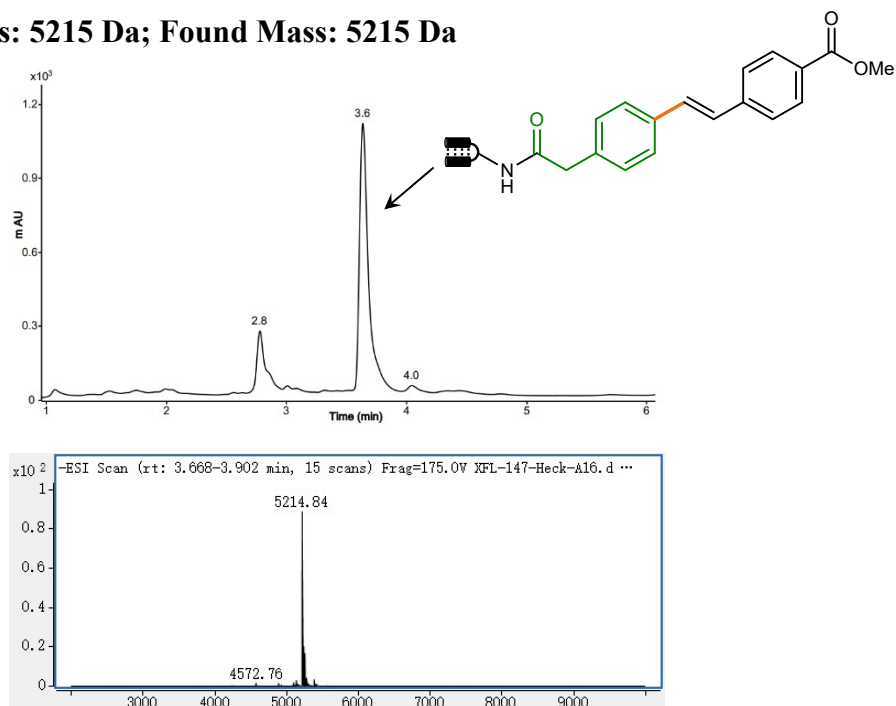

UPLC chromatograph and deconvoluted MS of **5ay**.

**Conversion: 70%**

**Calculated Mass: 5231 Da; Found Mass: 5231 Da**

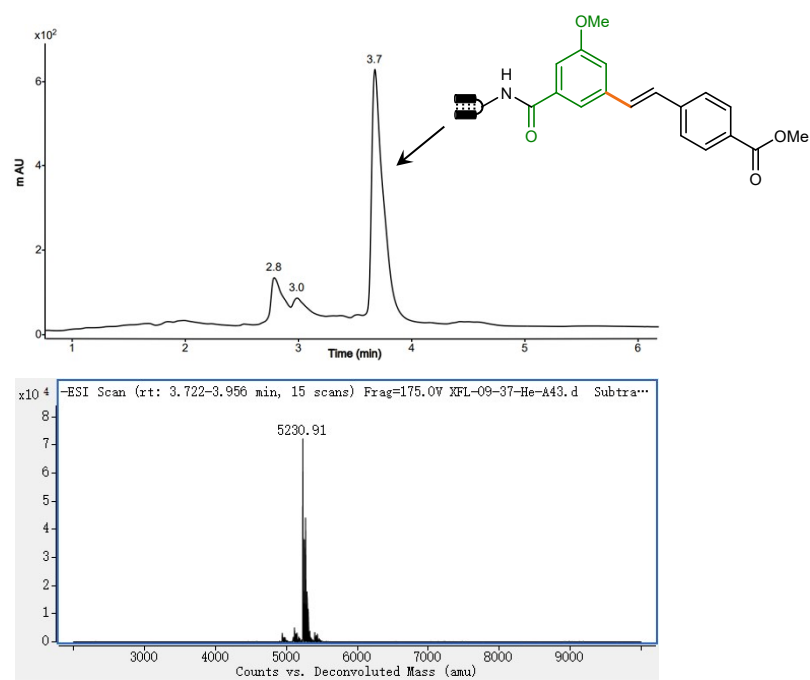



UPLC chromatograph and deconvoluted MS of **5az**.

**Conversion: 86%**

**Calculated Mass: 5269 Da; Found Mass: 5269 Da**

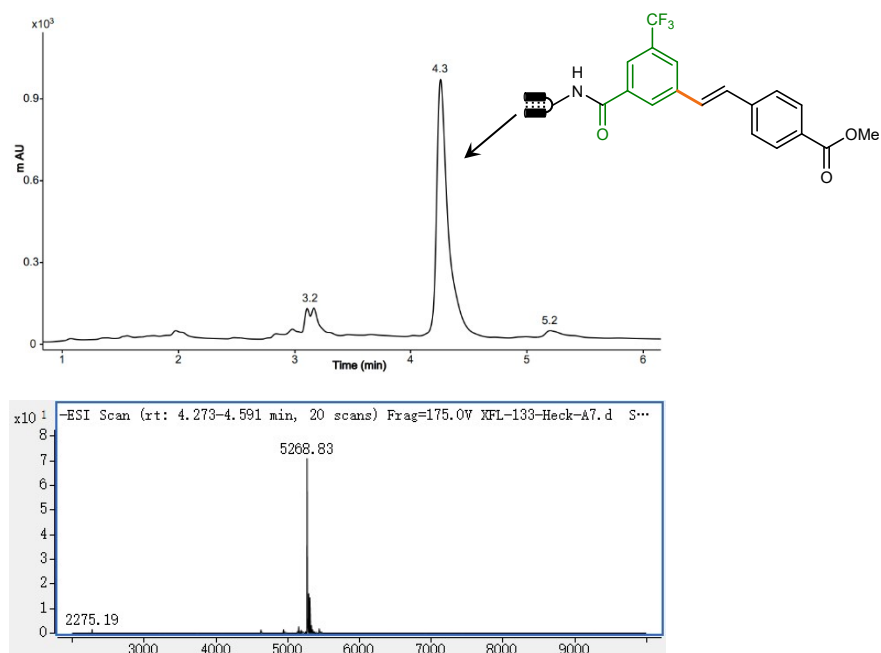

UPLC chromatograph and deconvoluted MS of **5ba**.

**Conversion: 92%**

**Calculated Mass: 5231 Da; Found Mass: 5231 Da**

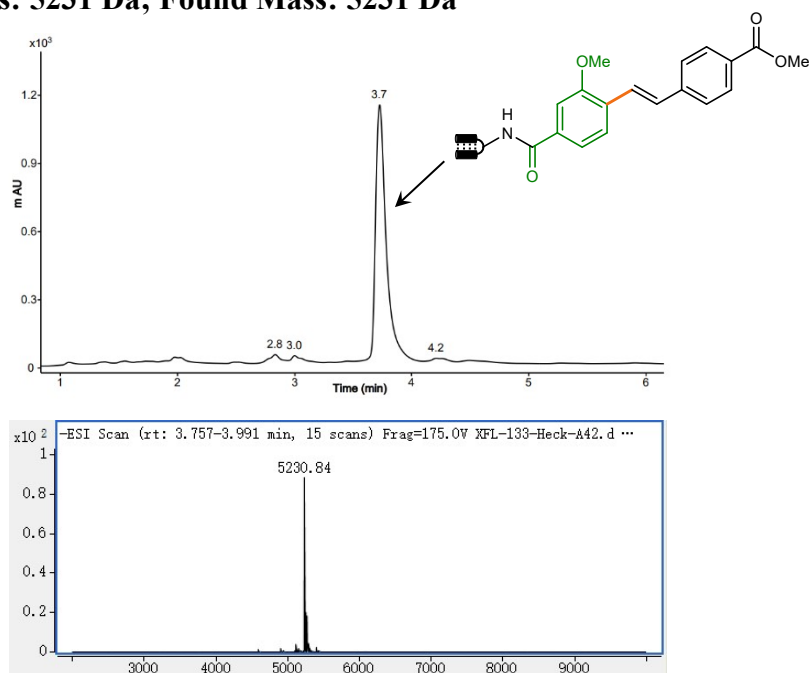

UPLC chromatograph and deconvoluted MS of **5bb**.

**Conversion: 76%**

**Calculated Mass: 5259 Da; Found Mass: 5259 Da**

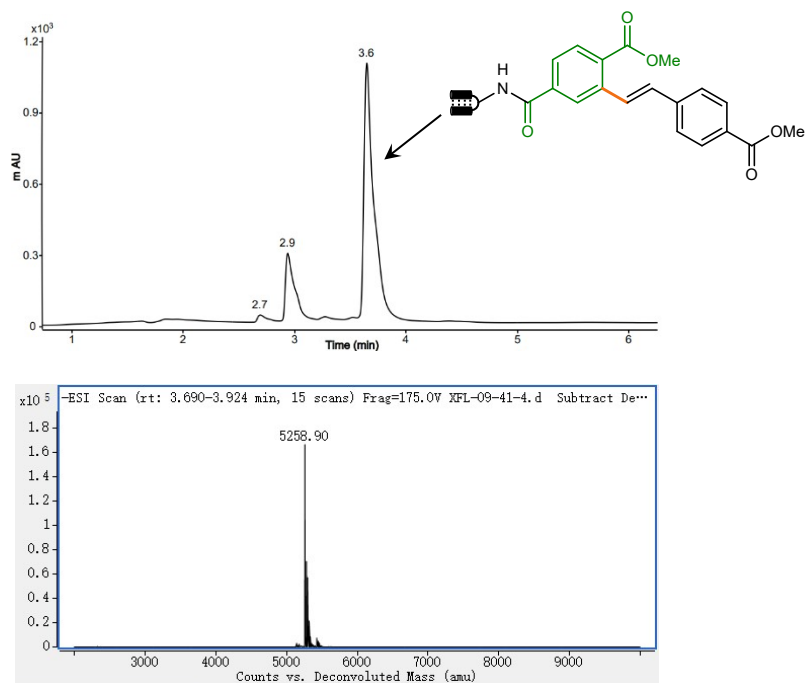

UPLC chromatograph and deconvoluted MS of **5bc**.

**Conversion: 92%**

**Calculated Mass: 5277 Da; Found Mass: 5277 Da**

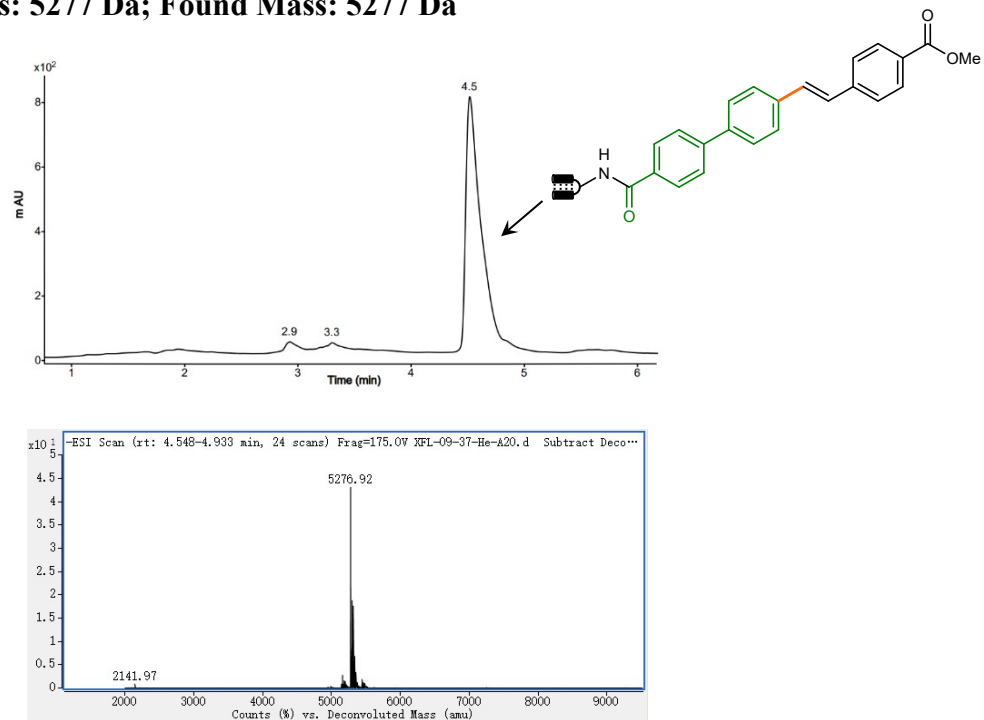

UPLC chromatograph and deconvoluted MS of **5bd**.

**Conversion: 81%**

**Calculated Mass: 5251 Da; Found Mass: 5251 Da**

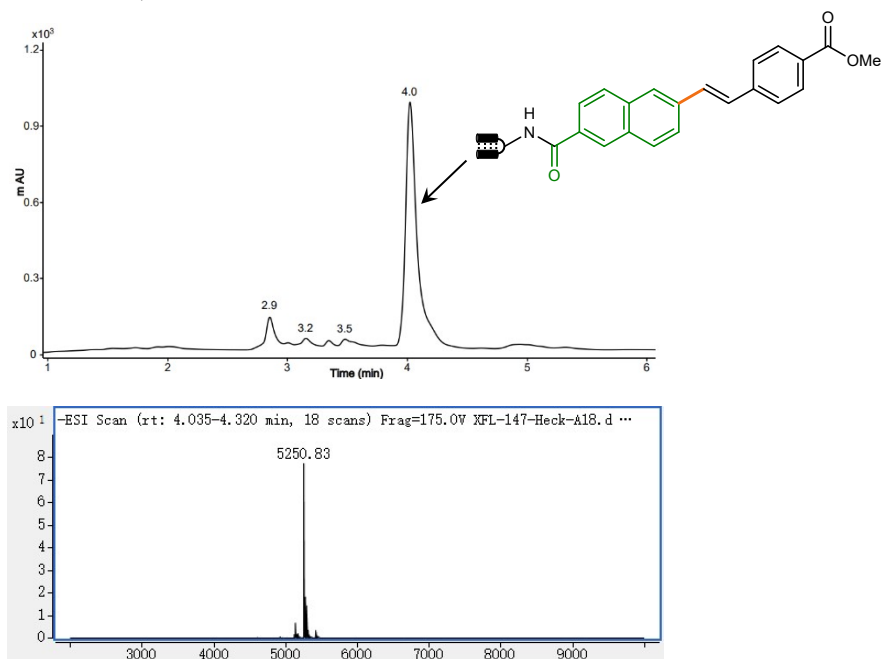

UPLC chromatograph and deconvoluted MS of **5be**.

**Conversion: 83%**

**Calculated Mass: 5237 Da; Found Mass: 5237 Da**

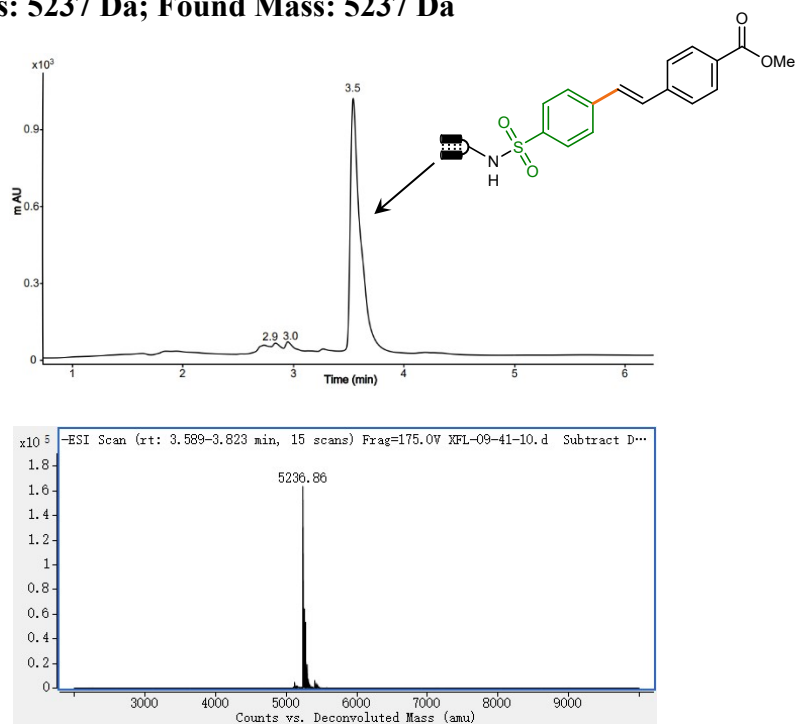

UPLC chromatograph and deconvoluted MS of **5bf**.

**Conversion: 86%**

**Calculated Mass: 5219 Da; Found Mass: 5219 Da**

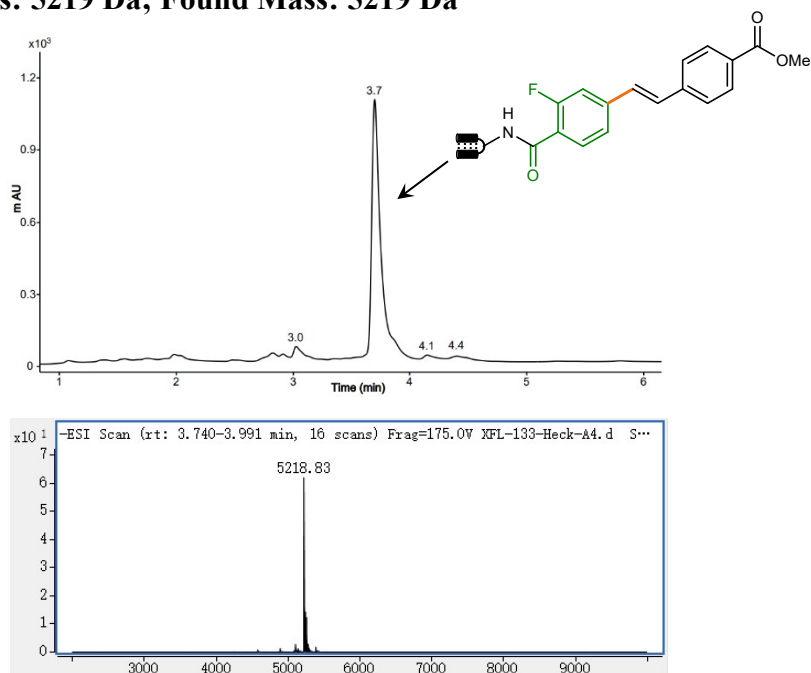

UPLC chromatograph and deconvoluted MS of **5bg**.

**Conversion: 89%**

**Calculated Mass: 5233 Da; Found Mass: 5233 Da**

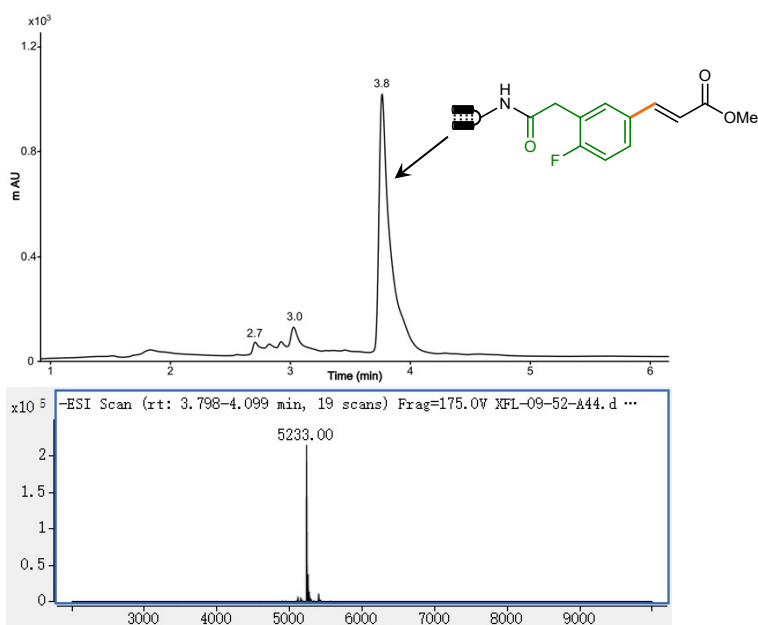

UPLC chromatograph and deconvoluted MS of **5bh**.

**Conversion: 96%**

**Calculated Mass: 5229 Da; Found Mass: 5229 Da**

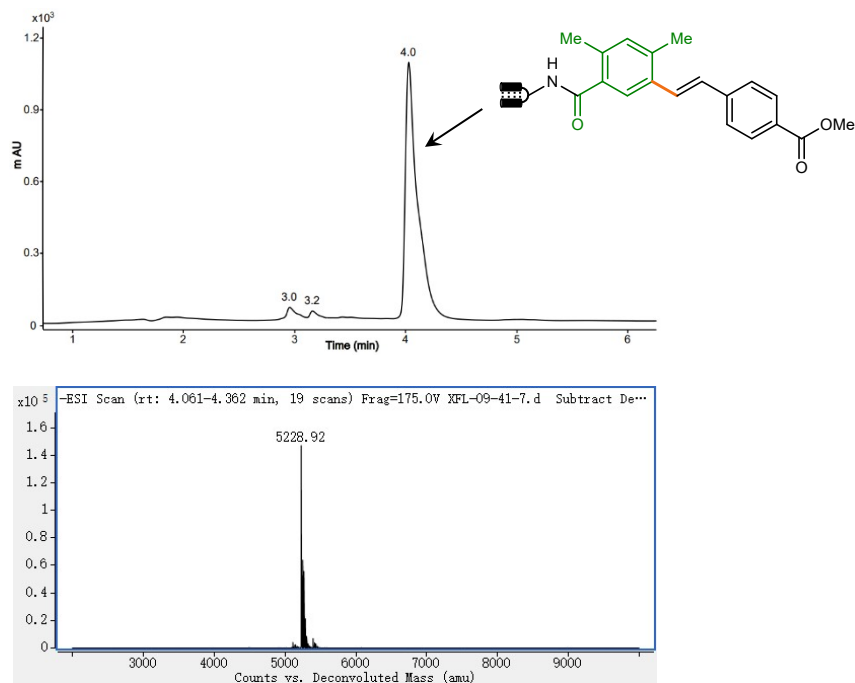

UPLC chromatograph and deconvoluted MS of **5bi**.

**Conversion: 84%**

**Calculated Mass: 5233 Da; Found Mass: 5233 Da**

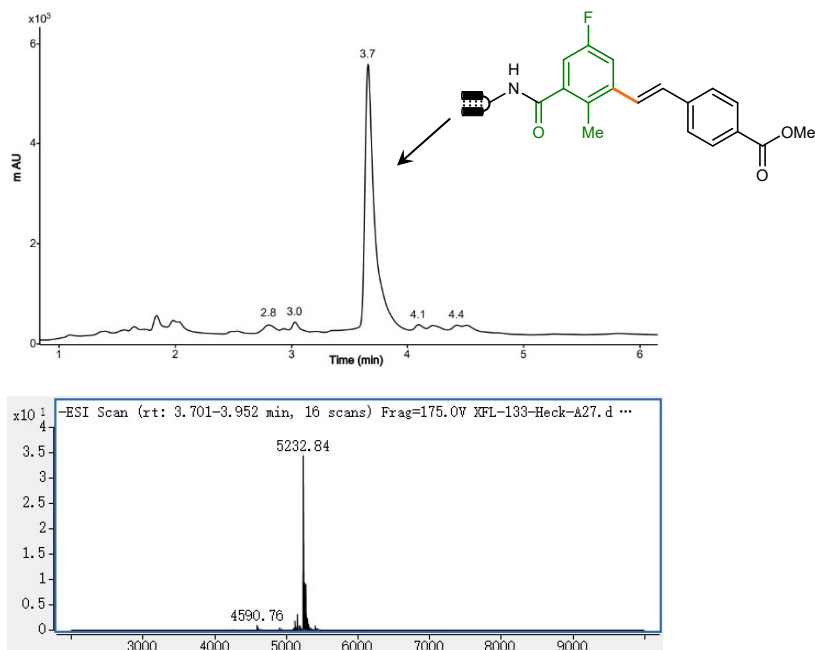

UPLC chromatograph and deconvoluted MS of **5bj**.

**Conversion: 82%**

**Calculated Mass: 5231 Da; Found Mass: 5231 Da**

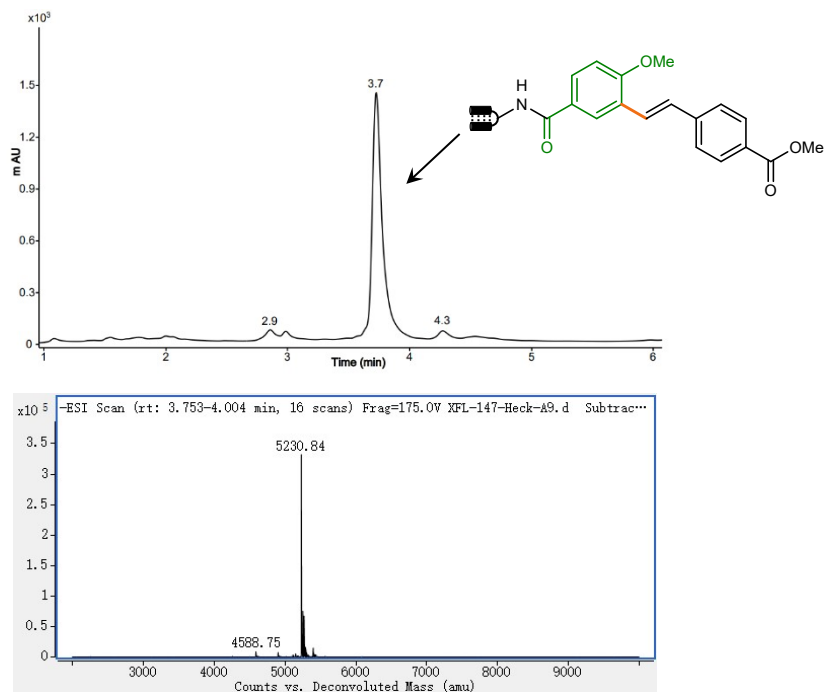

UPLC chromatograph and deconvoluted MS of **5bk**.

**Conversion: 64%**

**Calculated Mass: 5219 Da; Found Mass: 5219 Da**

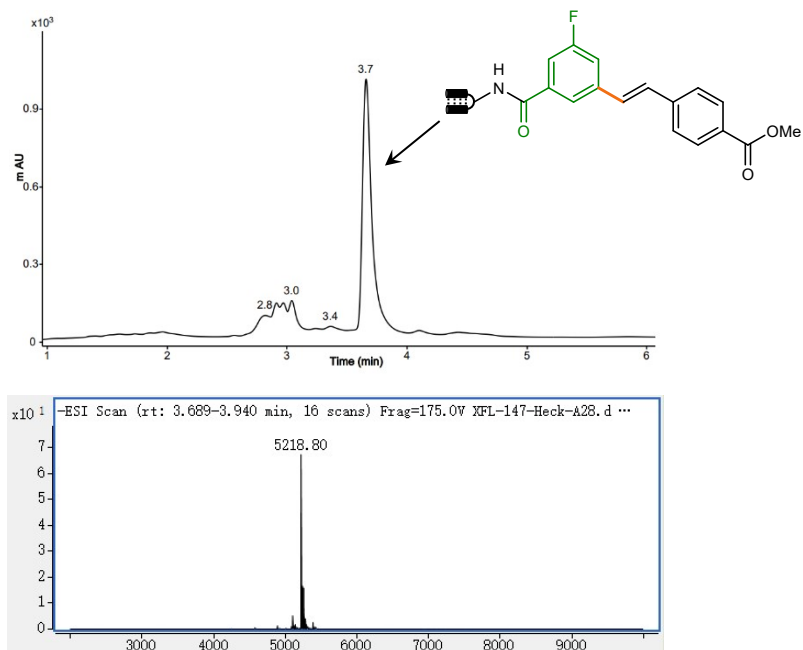

UPLC chromatograph and deconvoluted MS of **5bl**.

**Conversion: 84%**

**Calculated Mass: 5233 Da; Found Mass: 5233 Da**

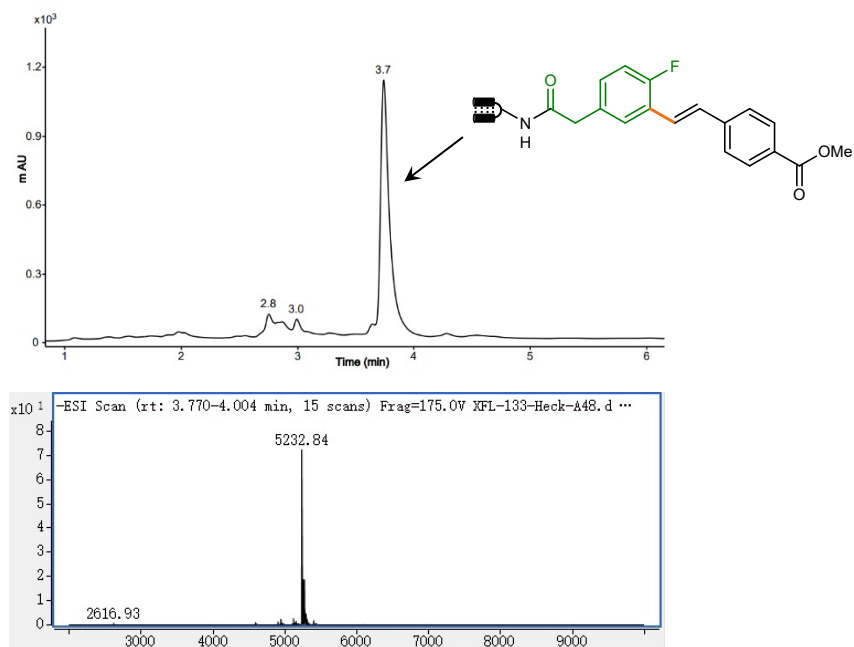

UPLC chromatograph and deconvoluted MS of **5bm**.

**Conversion: 90%**

**Calculated Mass: 5231 Da; Found Mass: 5231 Da**

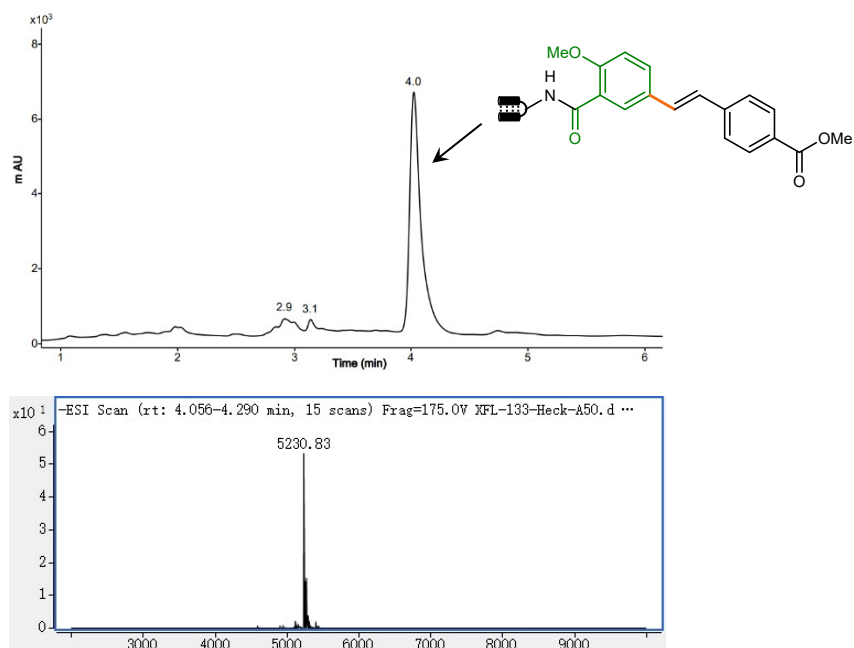

UPLC chromatograph and deconvoluted MS of **5bn**.

**Conversion: 50%**

**Calculated Mass: 5219 Da; Found Mass: 5219 Da**

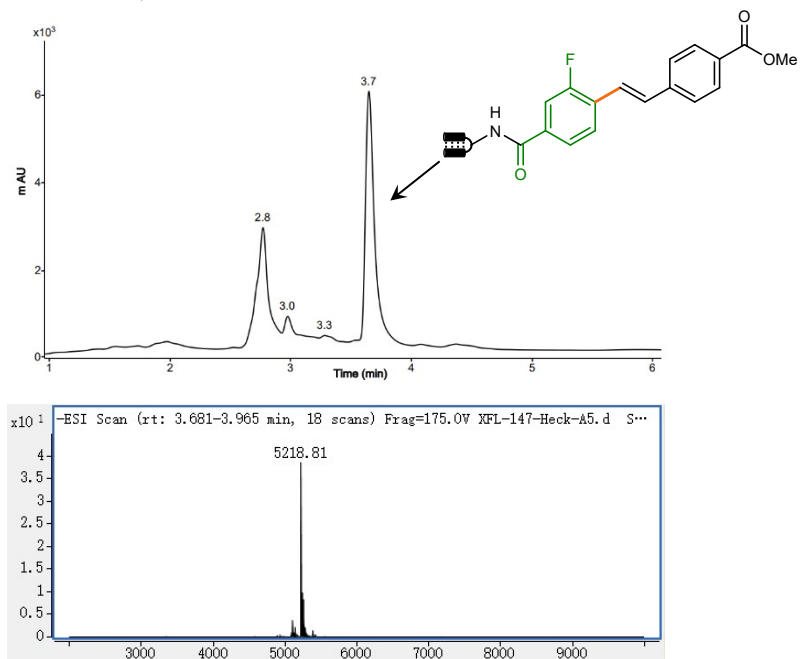

UPLC chromatograph and deconvoluted MS of **5bo**.

**Conversion: 87%**

**Calculated Mass: 5215 Da; Found Mass: 5215 Da**

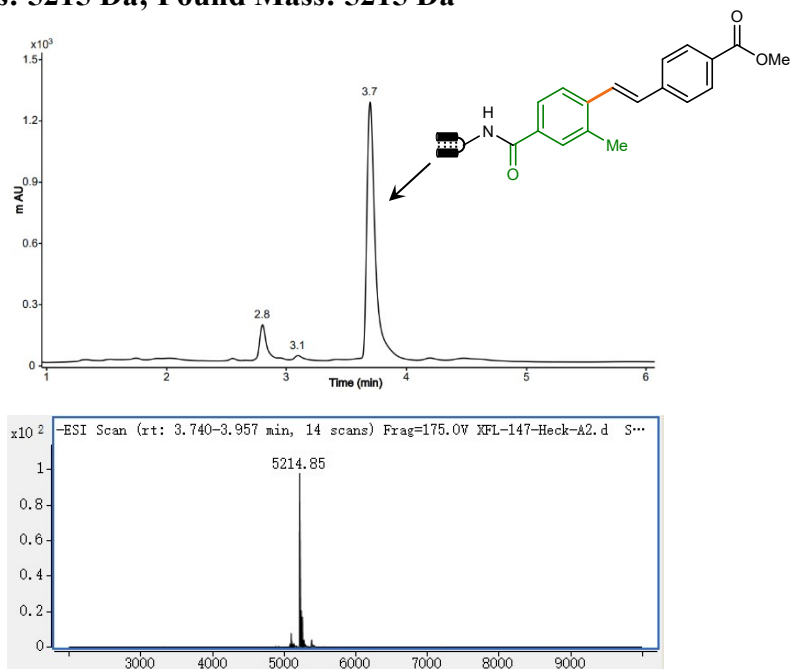



UPLC chromatograph and deconvoluted MS of **5bp**.

**Conversion: 84%**

**Calculated Mass: 5215 Da; Found Mass: 5215 Da**

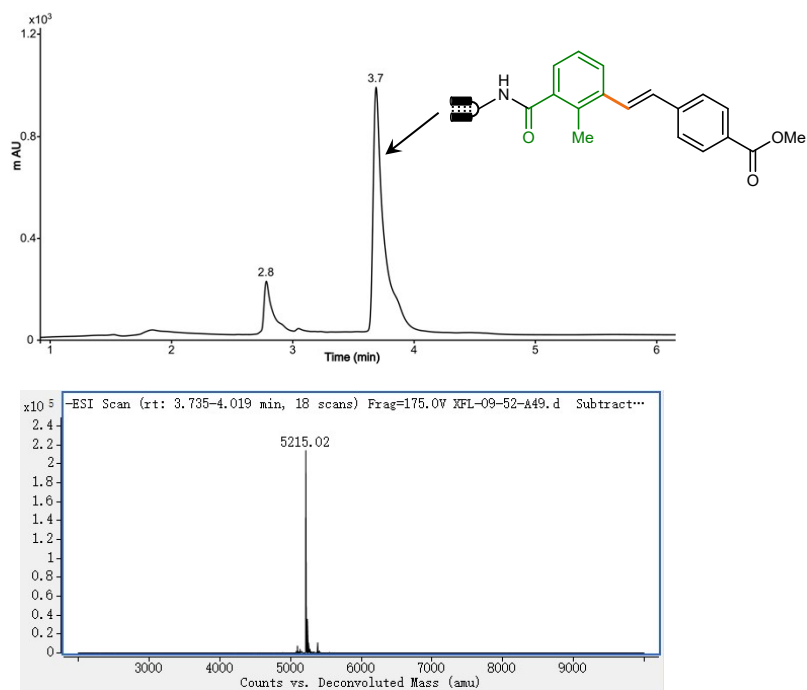

UPLC chromatograph and deconvoluted MS of **5bq**.

**Conversion: 90%**

**Calculated Mass: 5280 Da; Found Mass: 5280 Da**

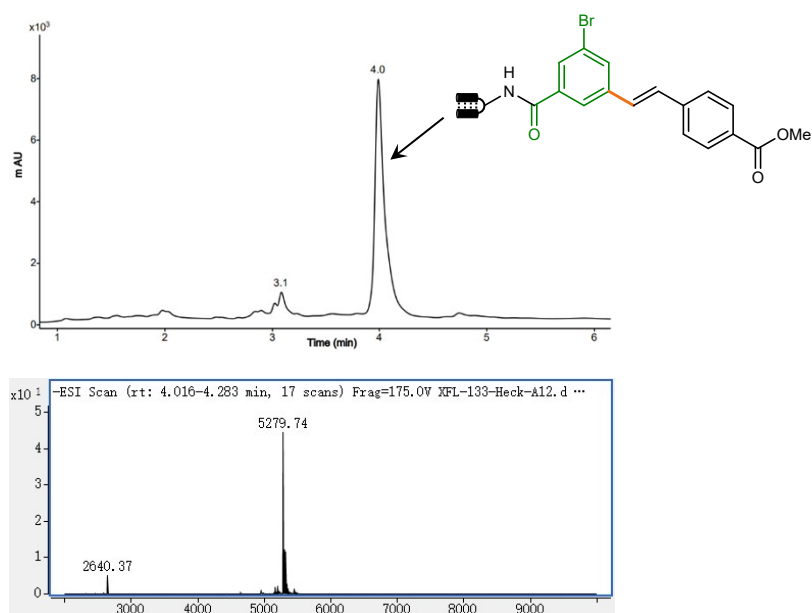

UPLC chromatograph and deconvoluted MS of **5br**.

**Conversion: 82%**

**Calculated Mass: 5240 Da; Found Mass: 5240 Da**

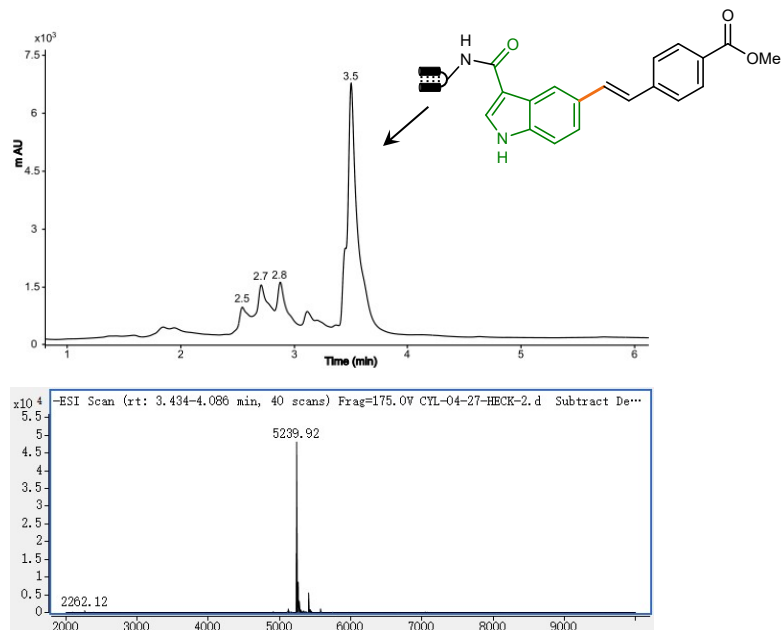

UPLC chromatograph and deconvoluted MS of **5bs**.

**Conversion: 70%**

**Calculated Mass: 5257 Da; Found Mass: 5257 Da**

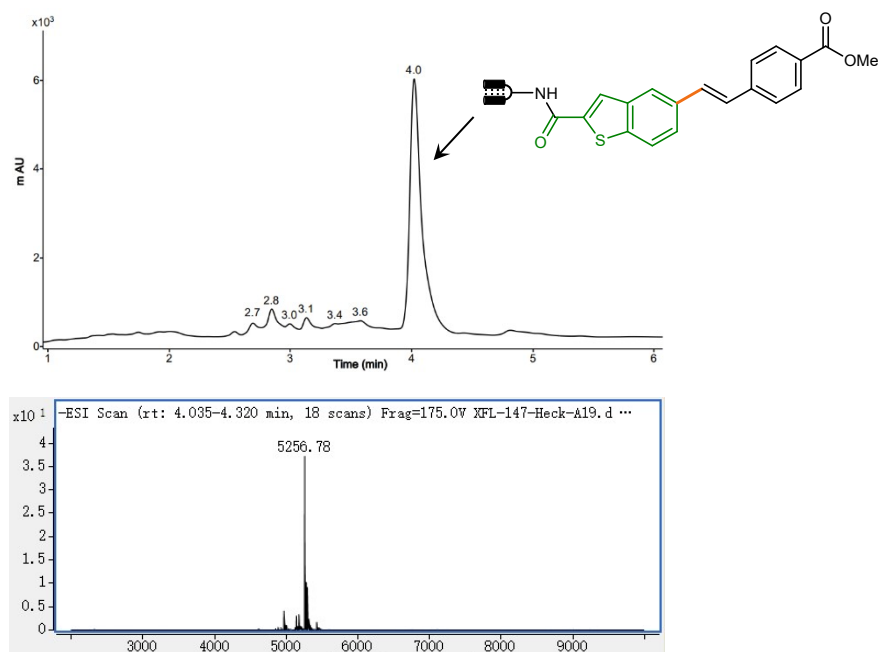

UPLC chromatograph and deconvoluted MS of **5bt**.

**Conversion: 73%**

**Calculated Mass: 5245 Da; Found Mass: 5245 Da**

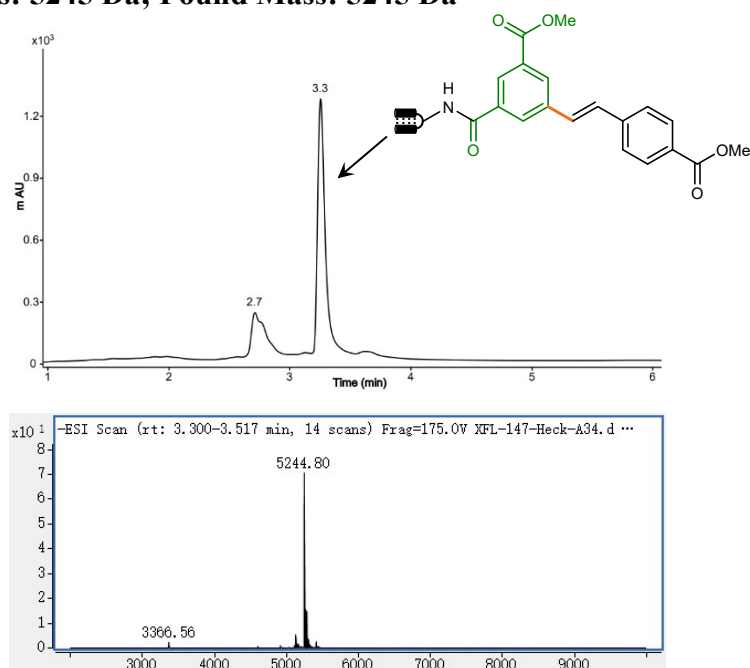

UPLC chromatograph and deconvoluted MS of **5bu**.

**Conversion: 81%**

**Calculated Mass: 5236 Da; Found Mass: 5235 Da**

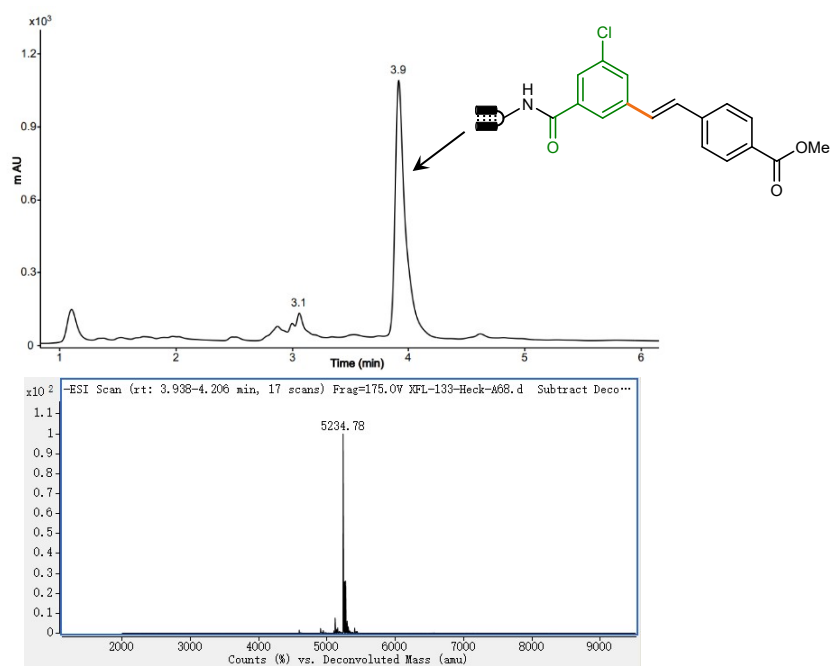

UPLC chromatograph and deconvoluted MS of **5bv**.

**Conversion: 84%**

**Calculated Mass: 5236 Da; Found Mass: 5236 Da**

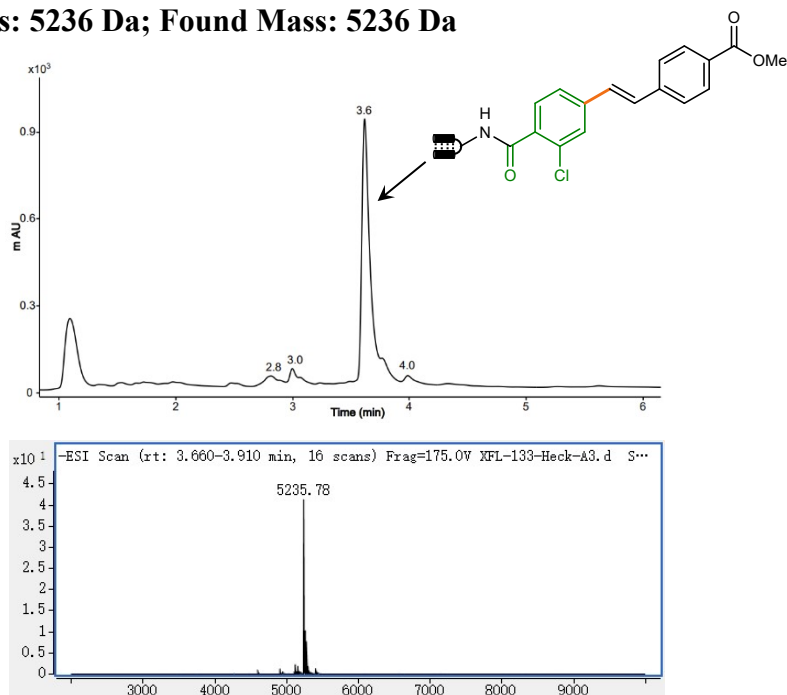

UPLC chromatograph and deconvoluted MS of **5bw**.

**Conversion: 88%**

**Calculated Mass: 5236 Da; Found Mass: 5236 Da**

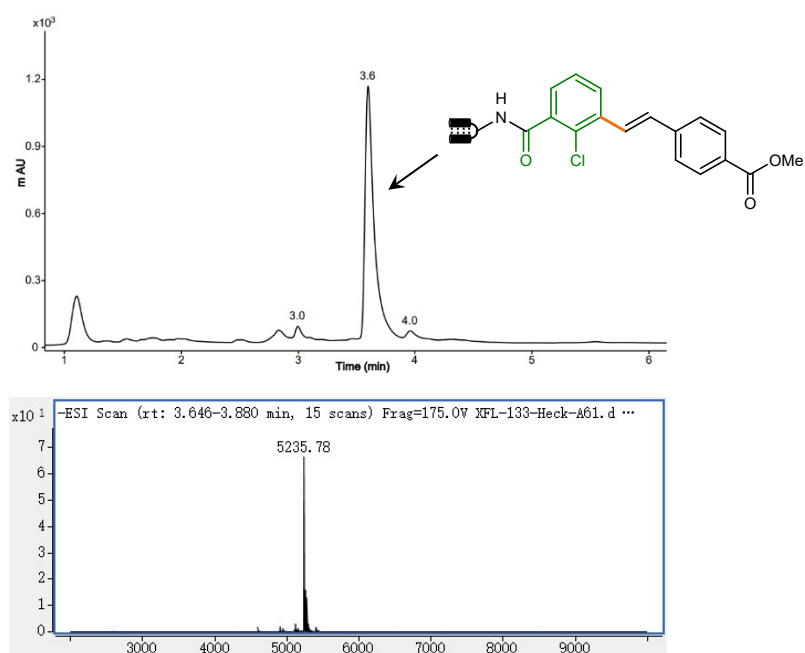

UPLC chromatograph and deconvoluted MS of **5bx**.

**Conversion: 82%**

**Calculated Mass: 5236 Da; Found Mass: 5236 Da**

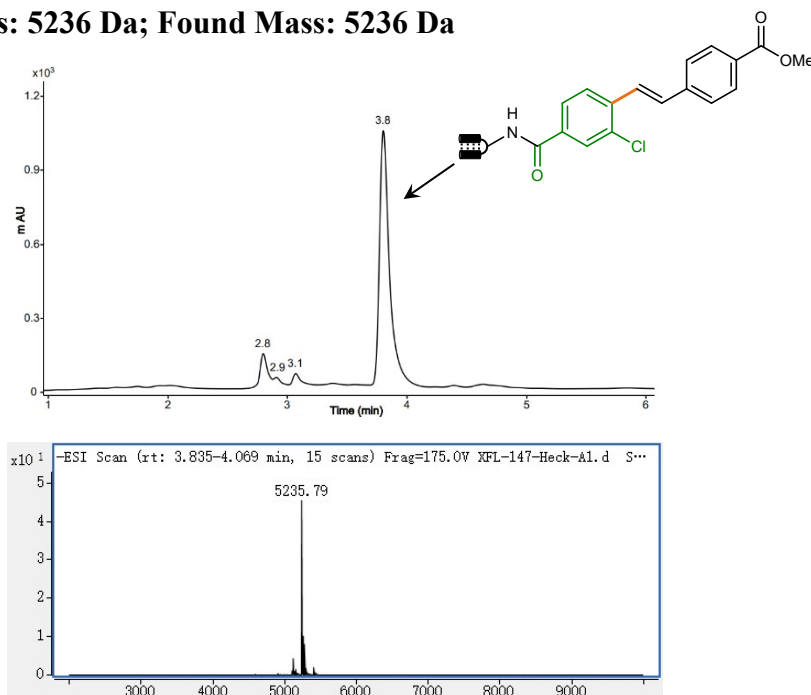

UPLC chromatograph and deconvoluted MS of **5by**.

**Conversion: 62%**

**Calculated Mass: 5215 Da; Found Mass: 5215 Da**

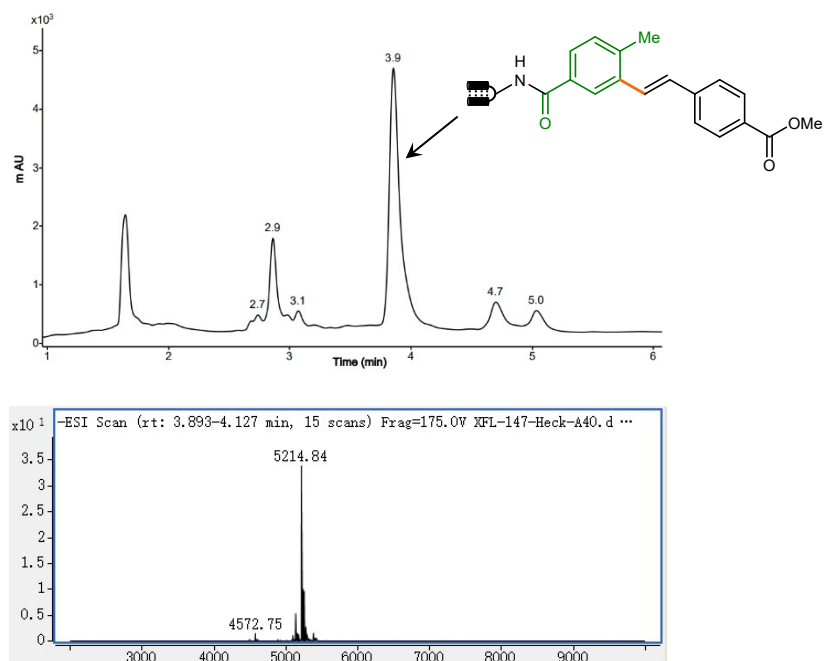

UPLC chromatograph and deconvoluted MS of **5bz**.

**Conversion: 80%**

**Calculated Mass: 5269 Da; Found Mass: 5269 Da**

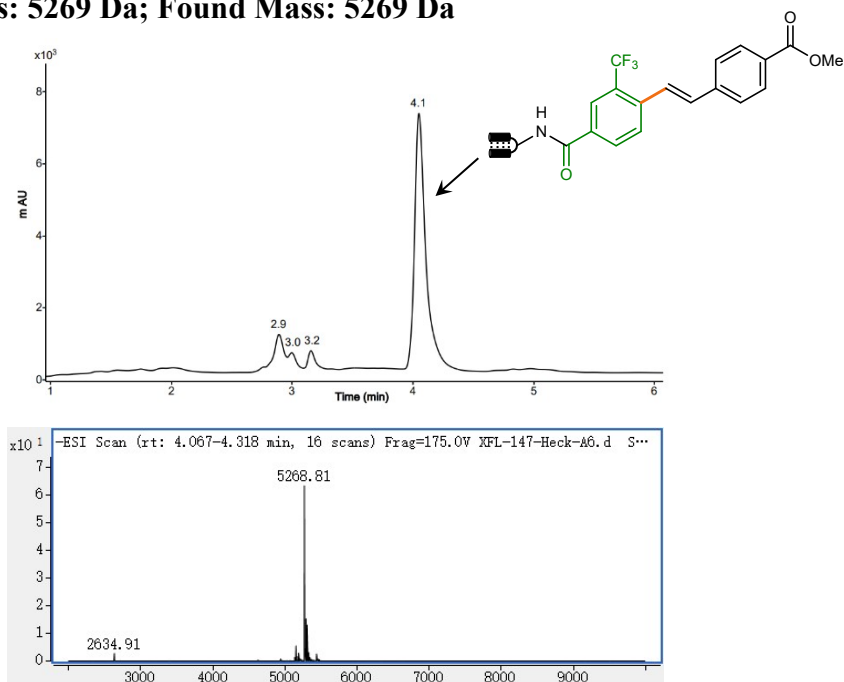

UPLC chromatograph and deconvoluted MS of **5ca**.

**Conversion: 81%**

**Calculated Mass: 5215 Da; Found Mass: 5215 Da**

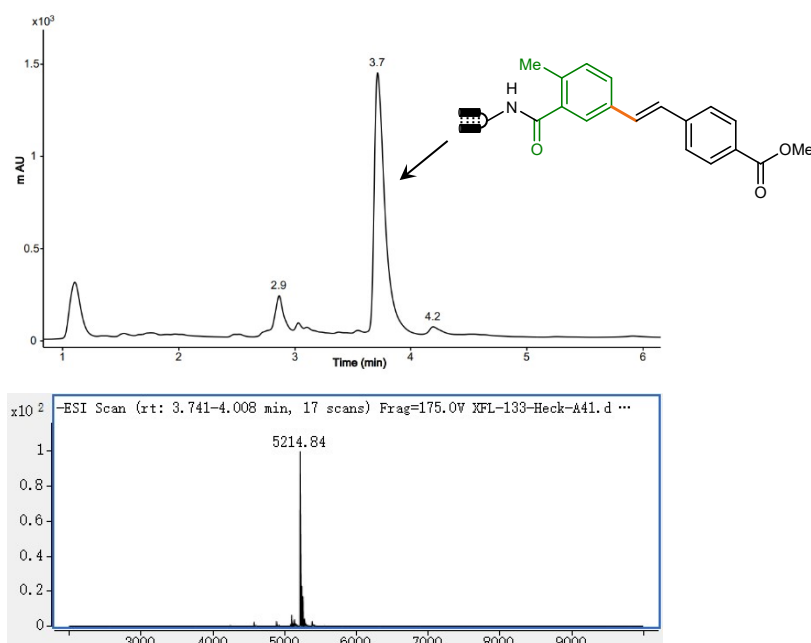

UPLC chromatograph and deconvoluted MS of **5cb**.

**Conversion: 43%**

**Calculated Mass: 5229 Da; Found Mass: 5229 Da**

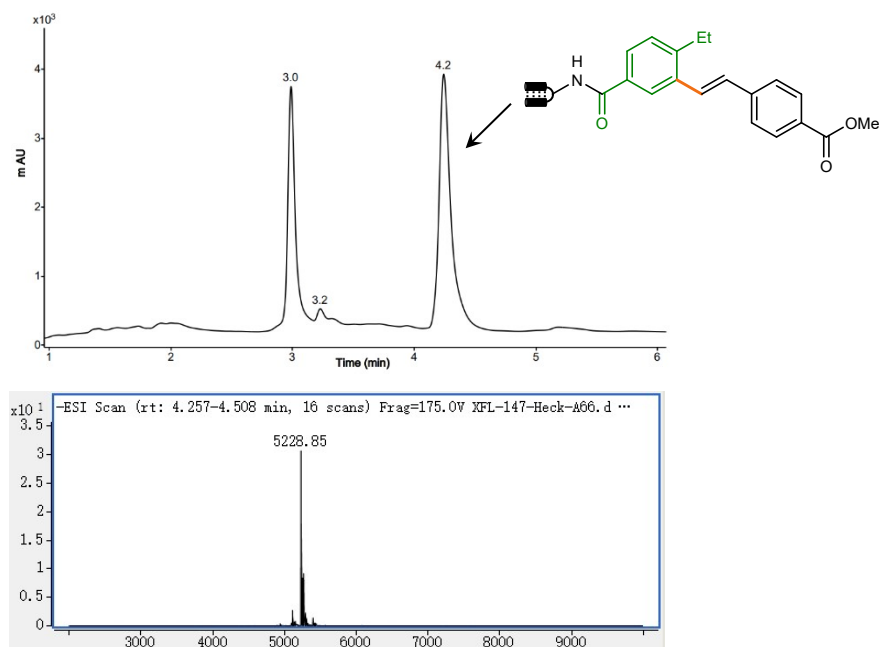

UPLC chromatograph and deconvoluted MS of **5cc**.

**Conversion: 67%**

**Calculated Mass: 5246 Da; Found Mass: 5246 Da**

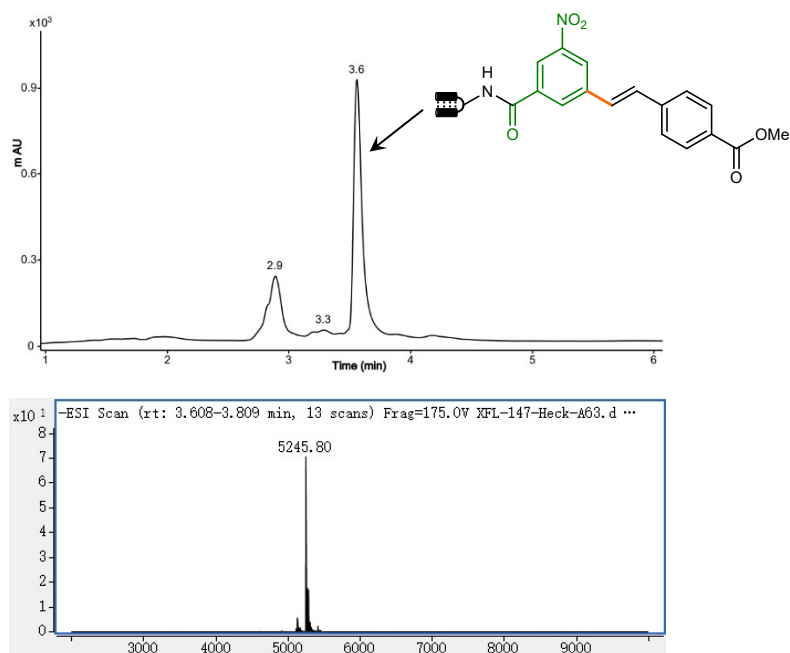

## 8.7 Substrate scope of DNA-conjugated arylamines for the on-DNA Heck reaction with 4r

UPLC chromatograph and deconvoluted MS of **5r**.

**Conversion: 86%**

**Calculated Mass: 5125 Da; Found Mass: 5125 Da**

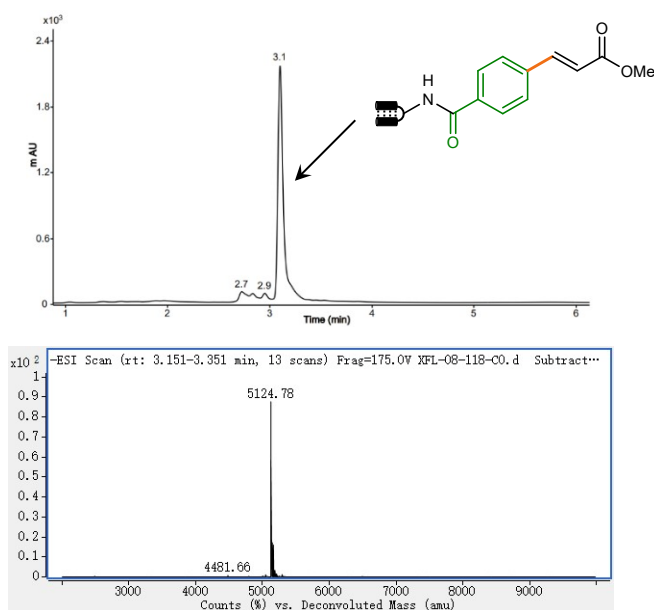

UPLC chromatograph and deconvoluted MS of **5cd**.

**Conversion: 84%**

**Calculated Mass: 5125 Da; Found Mass: 5125 Da**

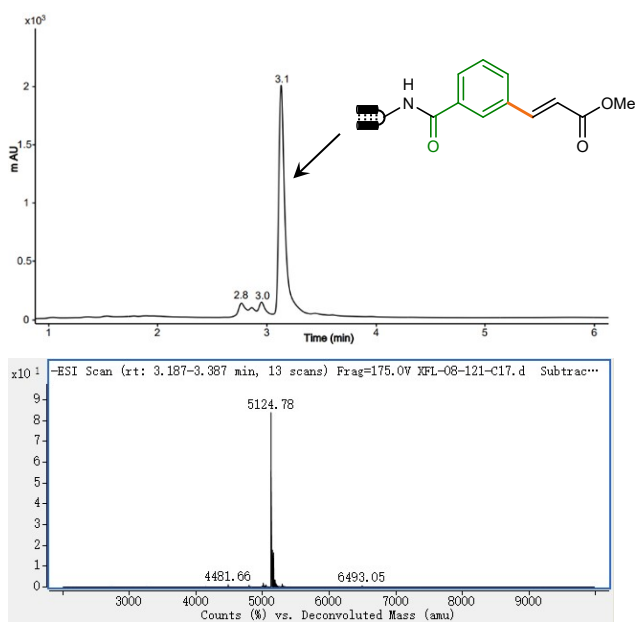



UPLC chromatograph and deconvoluted MS of **5ce**.

**Conversion: 92%**

**Calculated Mass: 5139 Da; Found Mass: 5139 Da**

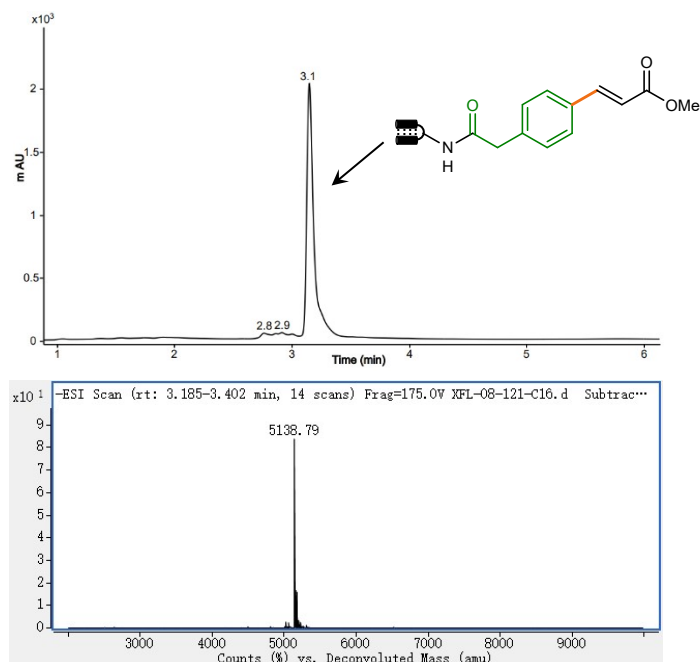

UPLC chromatograph and deconvoluted MS of **5cf**.

**Conversion: 80%**

**Calculated Mass: 5155 Da; Found Mass: 5155 Da**

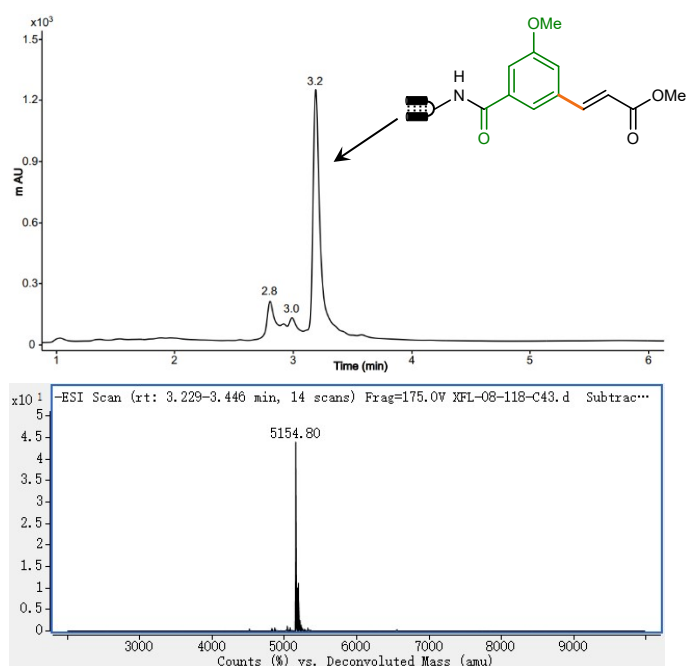

UPLC chromatograph and deconvoluted MS of **5cg**.

**Conversion: 72%**

**Calculated Mass: 5193 Da; Found Mass: 5193 Da**

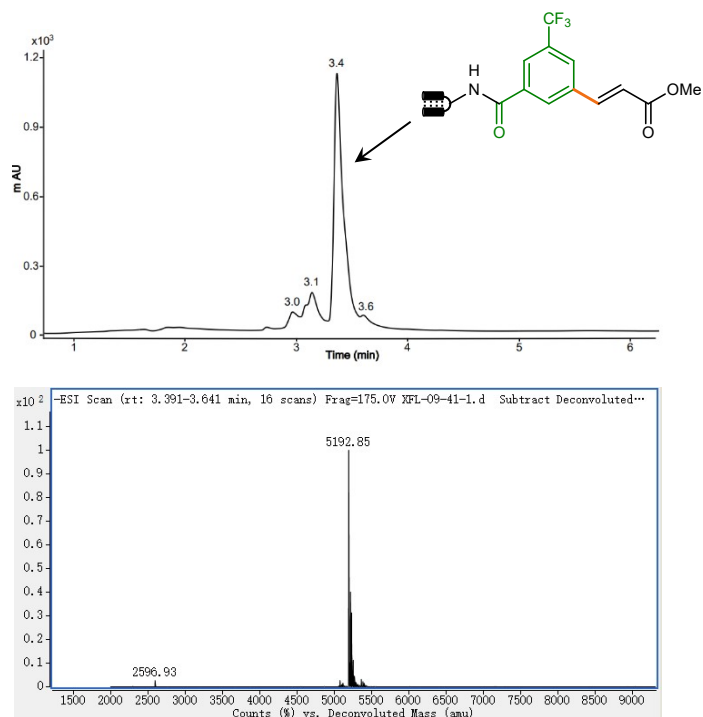

UPLC chromatograph and deconvoluted MS of **5ch**.

**Conversion: 92%**

**Calculated Mass: 5155 Da; Found Mass: 5155 Da**

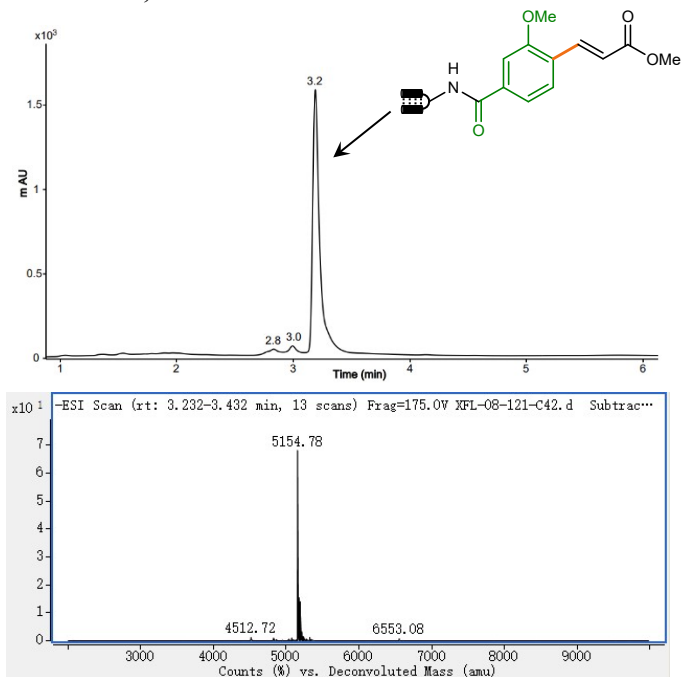

UPLC chromatograph and deconvoluted MS of **5ci**.

**Conversion: 89%**

**Calculated Mass: 5183 Da; Found Mass: 5184 Da**

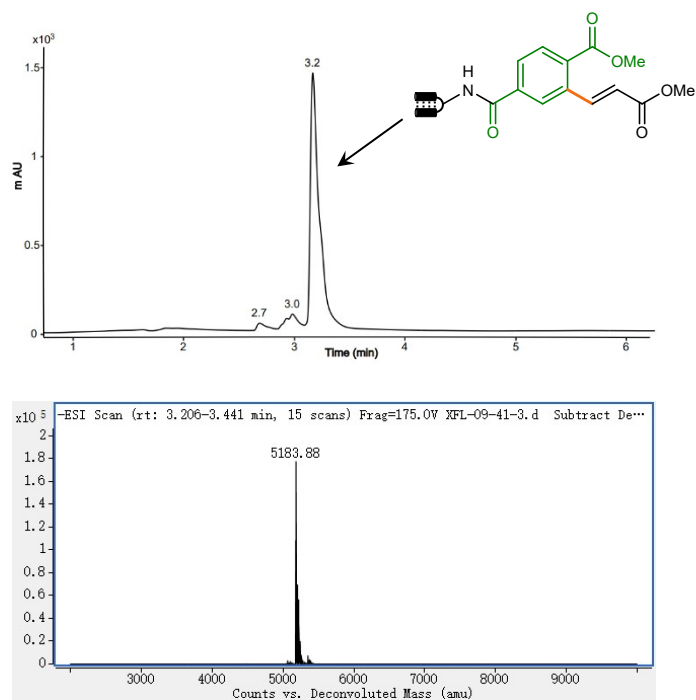

UPLC chromatograph and deconvoluted MS of **5cj**.

**Conversion: 95%**

**Calculated Mass: 5201 Da; Found Mass: 5201 Da**

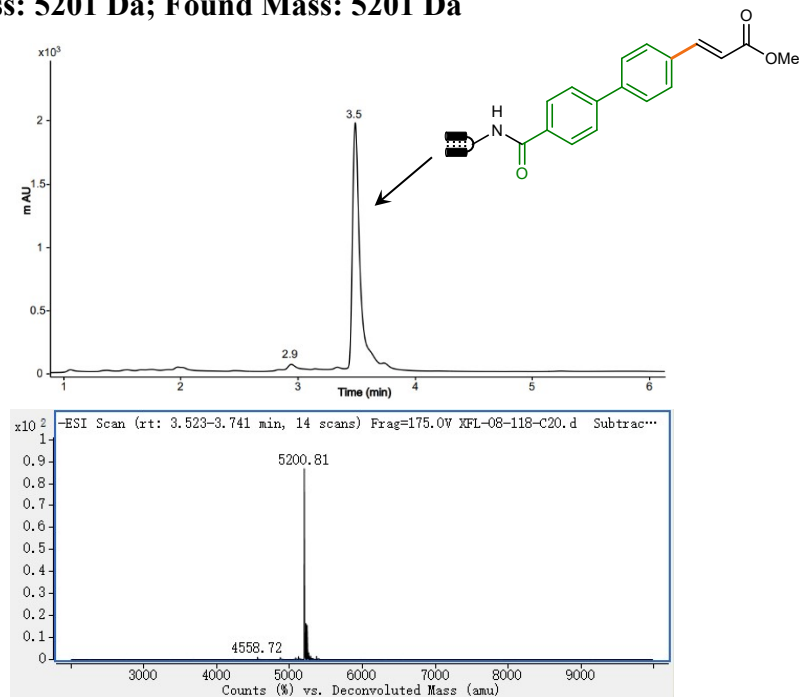

UPLC chromatograph and deconvoluted MS of **5ck**.

**Conversion: 87%**

**Calculated Mass: 5175 Da; Found Mass: 5175 Da**

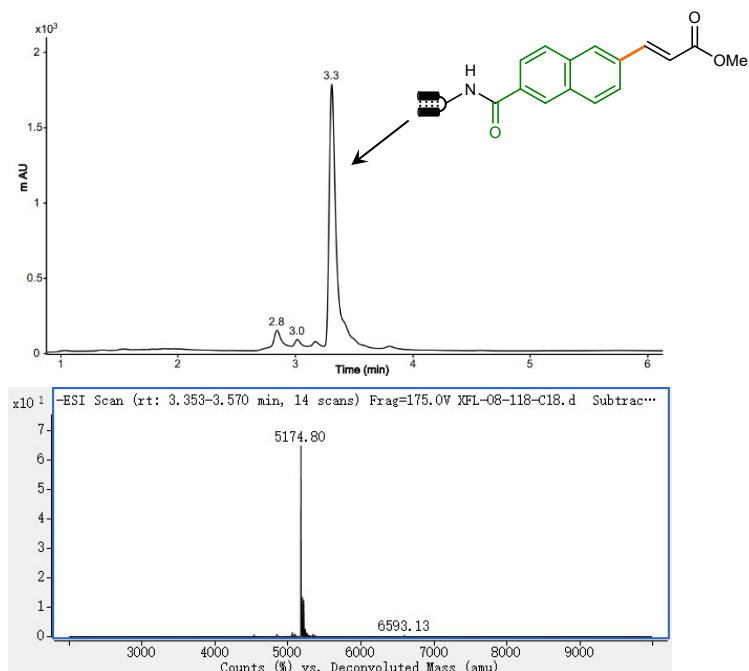

UPLC chromatograph and deconvoluted MS of **5cl**.

**Conversion: 86%**

**Calculated Mass: 5161 Da; Found Mass: 5161 Da**

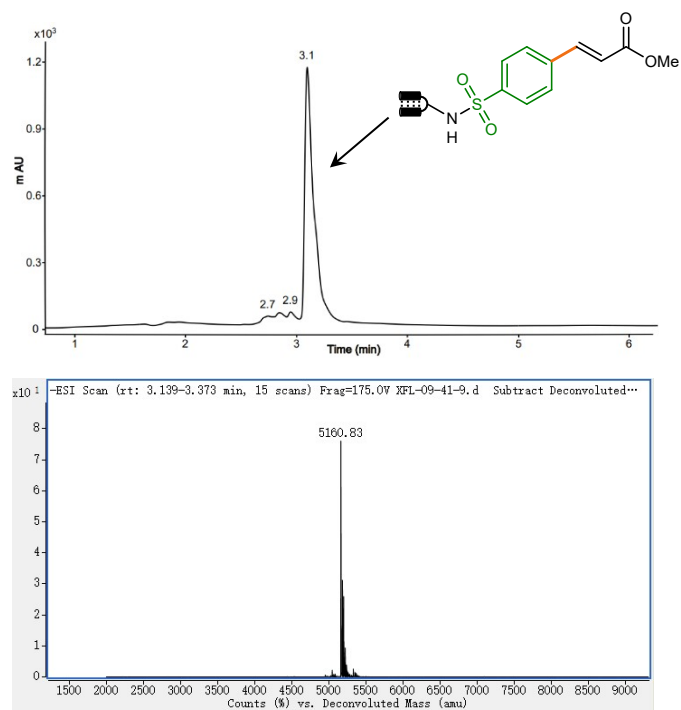

UPLC chromatograph and deconvoluted MS of **5cm**.

**Conversion: 86%**

**Calculated Mass: 5143 Da; Found Mass: 5143 Da**

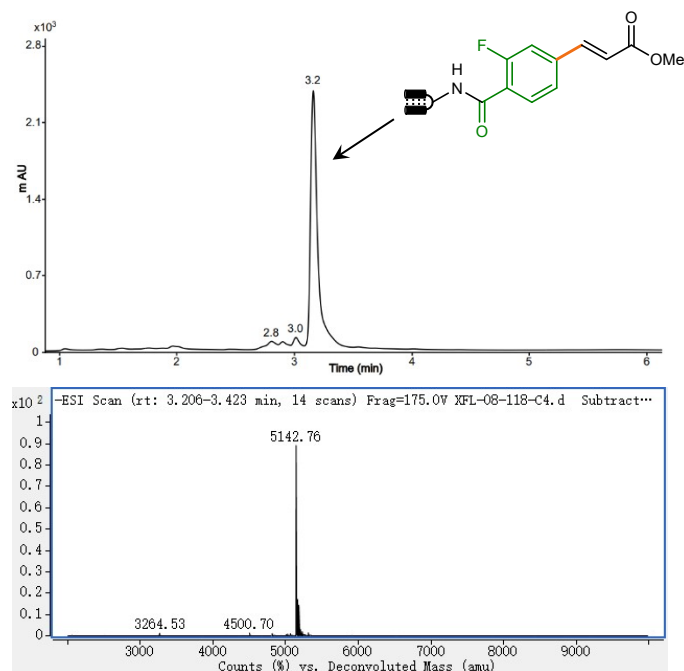

UPLC chromatograph and deconvoluted MS of **5cn**.

**Conversion: 88%**

**Calculated Mass: 5157 Da; Found Mass: 5157 Da**

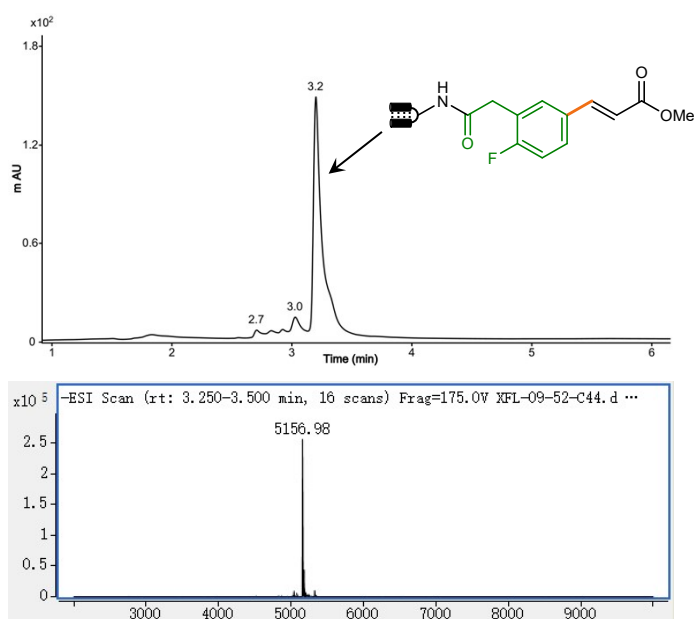

UPLC chromatograph and deconvoluted MS of **5co**.

**Conversion: 93%**

**Calculated Mass: 5153 Da; Found Mass: 5153 Da**

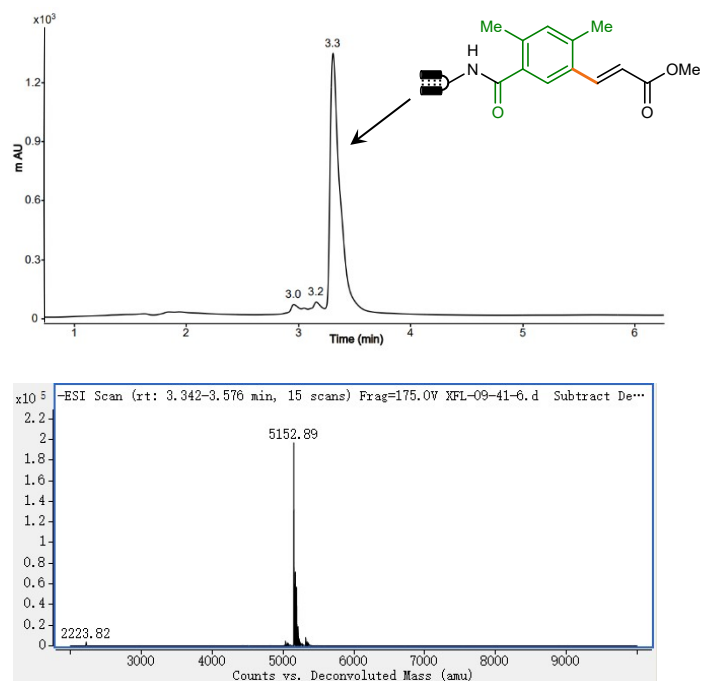

UPLC chromatograph and deconvoluted MS of **5cp**.

**Conversion: 88%**

**Calculated Mass: 5157 Da; Found Mass: 5157 Da**

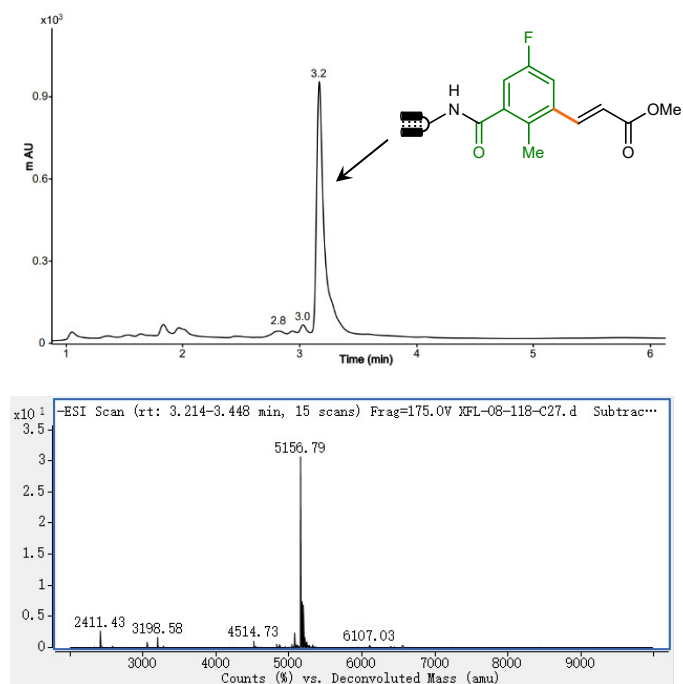

UPLC chromatograph and deconvoluted MS of **5cq**.

**Conversion: 94%**

**Calculated Mass: 5155 Da; Found Mass: 5155 Da**

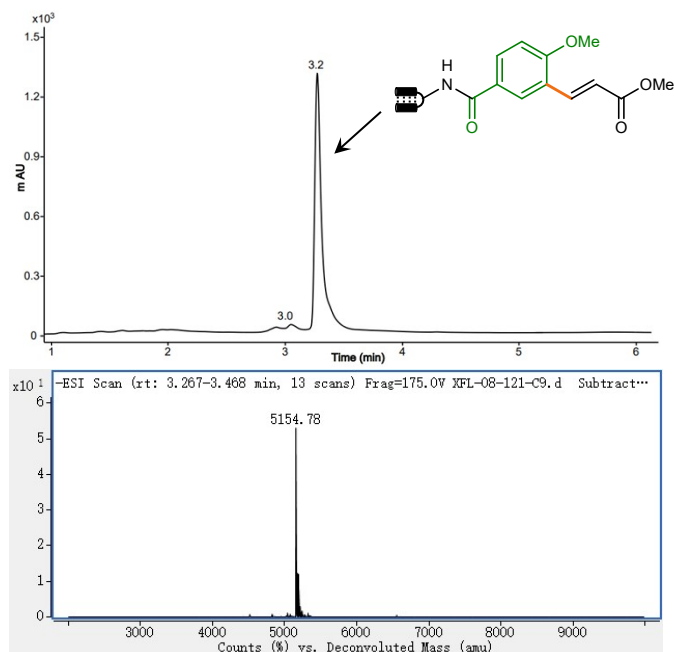

UPLC chromatograph and deconvoluted MS of **5cr**.

**Conversion: 75%**

**Calculated Mass: 5143 Da; Found Mass: 5143 Da**

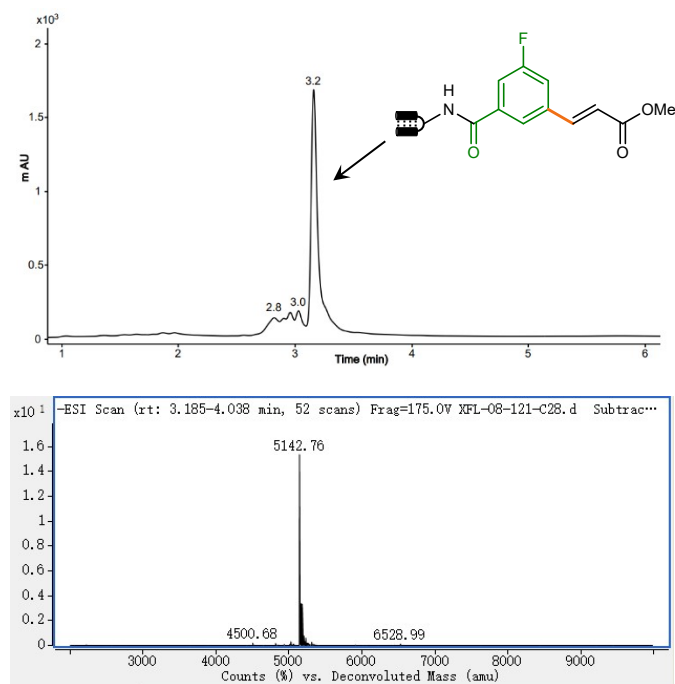

UPLC chromatograph and deconvoluted MS of **5cs**.

**Conversion: 85%**

**Calculated Mass: 5157 Da; Found Mass: 5157 Da**

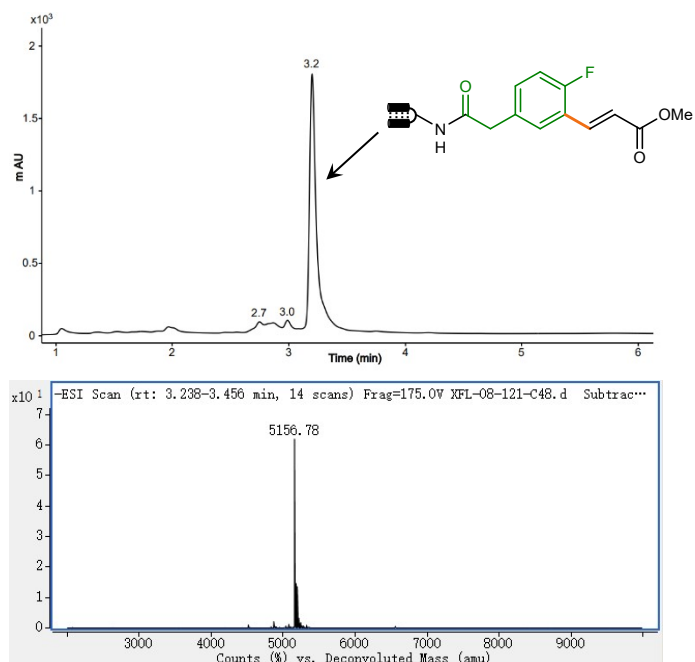

UPLC chromatograph and deconvoluted MS of **5ct**.

**Conversion: 87%**

**Calculated Mass: 5155 Da; Found Mass: 5155 Da**

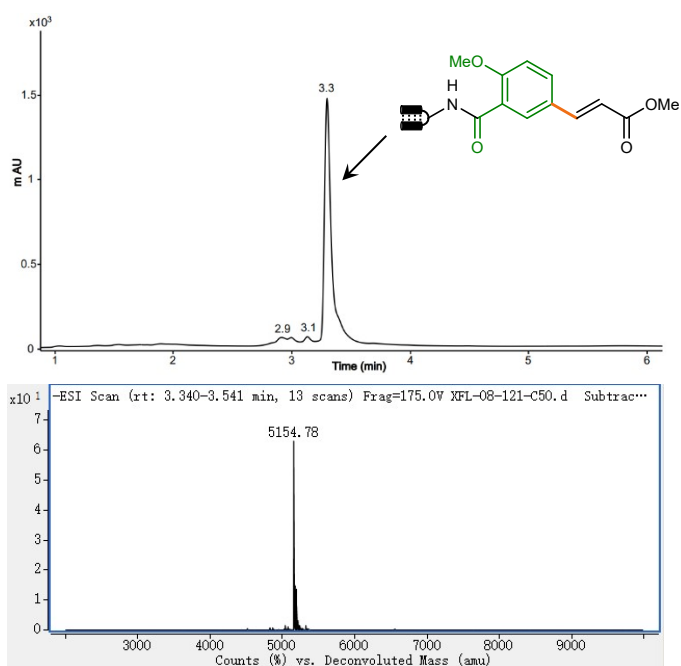



UPLC chromatograph and deconvoluted MS of **5cu**.

**Conversion: 75%**

**Calculated Mass: 5143 Da; Found Mass: 5143 Da**

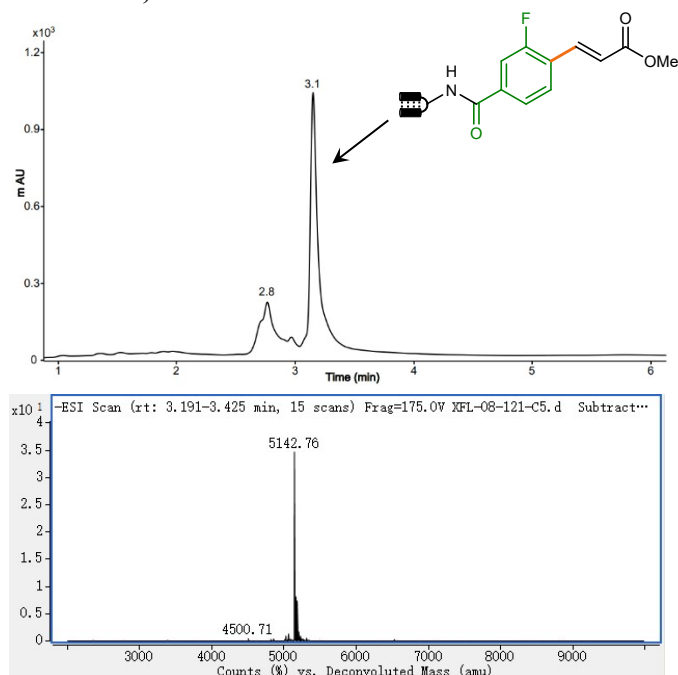

UPLC chromatograph and deconvoluted MS of **5cv**.

**Conversion: 92%**

**Calculated Mass: 5139 Da; Found Mass: 5139 Da**

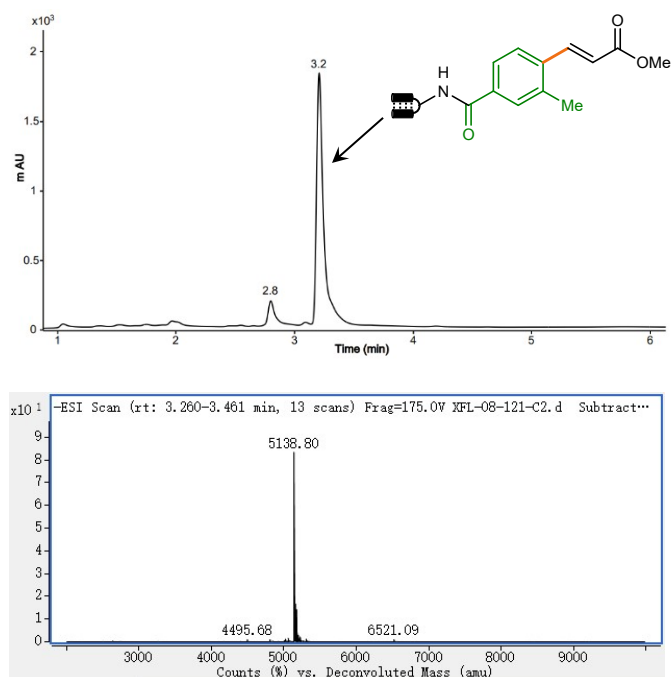

UPLC chromatograph and deconvoluted MS of **5cw**.

**Conversion: 85%**

**Calculated Mass: 5139 Da; Found Mass: 5139 Da**

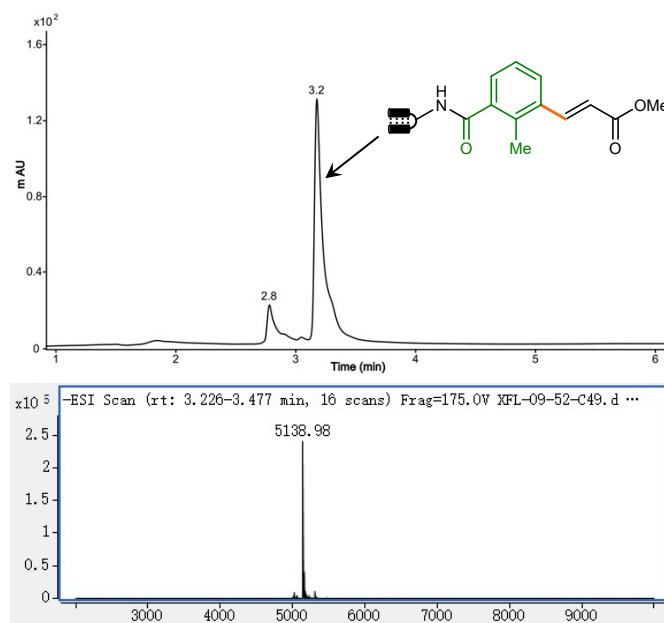

UPLC chromatograph and deconvoluted MS of **5cx**.

**Conversion: 91%**

**Calculated Mass: 5204 Da; Found Mass: 5204 Da**

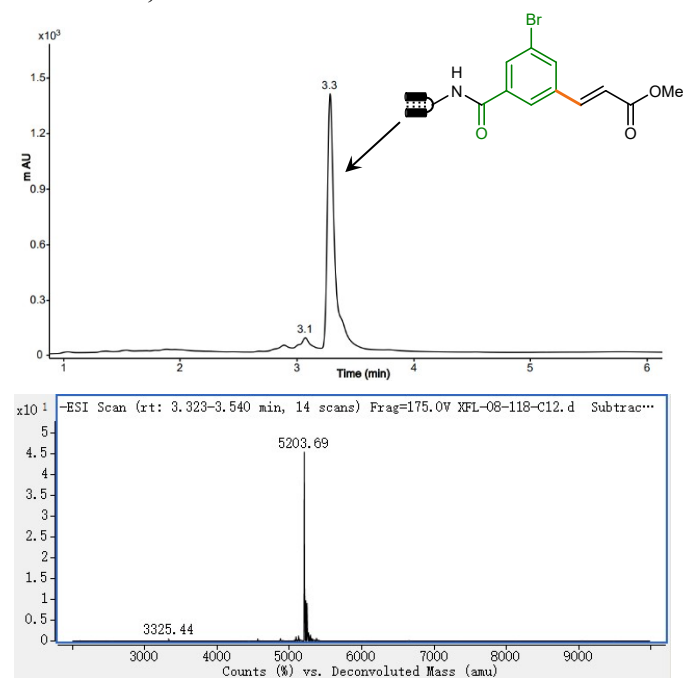

UPLC chromatograph and deconvoluted MS of **5cy**.

**Conversion: 50%**

**Calculated Mass: 5164 Da; Found Mass: 5164 Da**

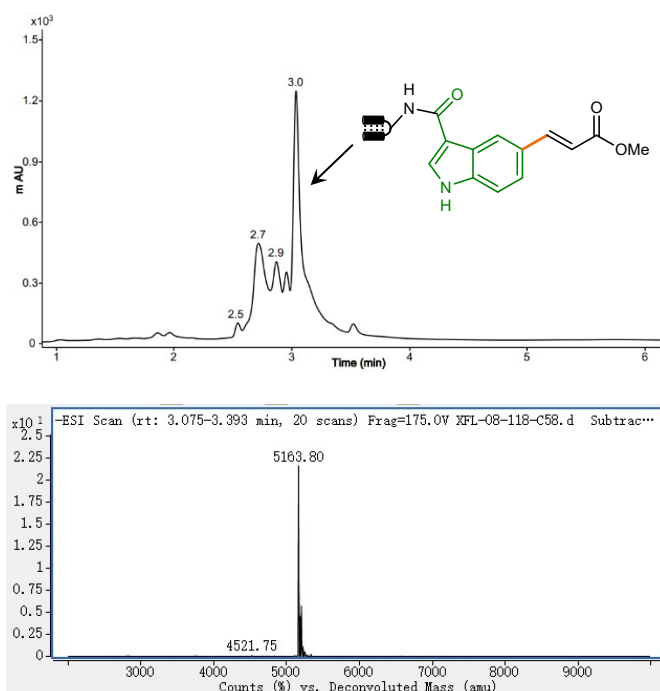

UPLC chromatograph and deconvoluted MS of **5cz**.

**Conversion: 75%**

**Calculated Mass: 5181 Da; Found Mass: 5181 Da**

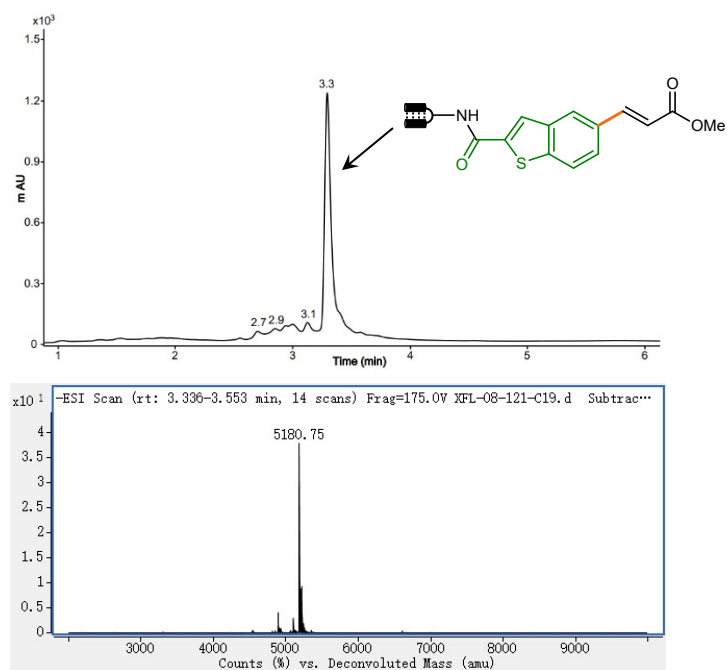

UPLC chromatograph and deconvoluted MS of **5da**.

**Conversion: 79%**

**Calculated Mass: 5169 Da; Found Mass: 5169 Da**

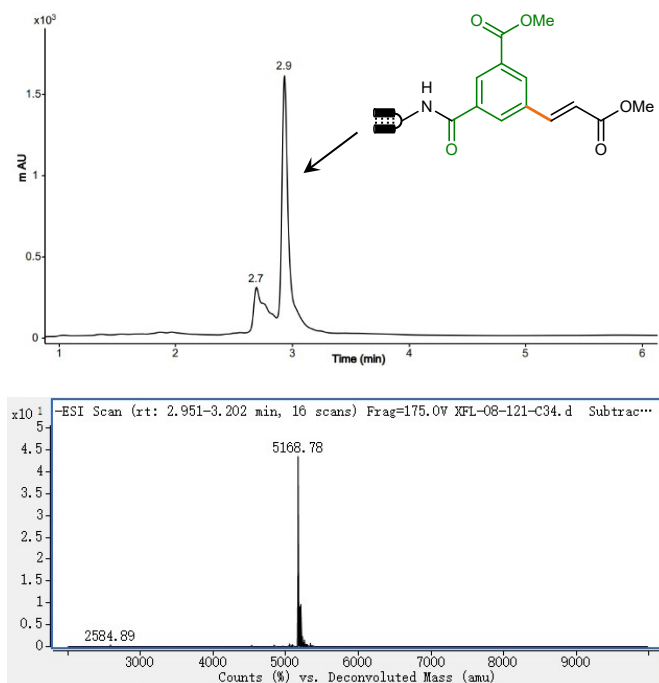

UPLC chromatograph and deconvoluted MS of **5db**.

**Conversion: 89%**

**Calculated Mass: 5160 Da; Found Mass: 5160 Da**

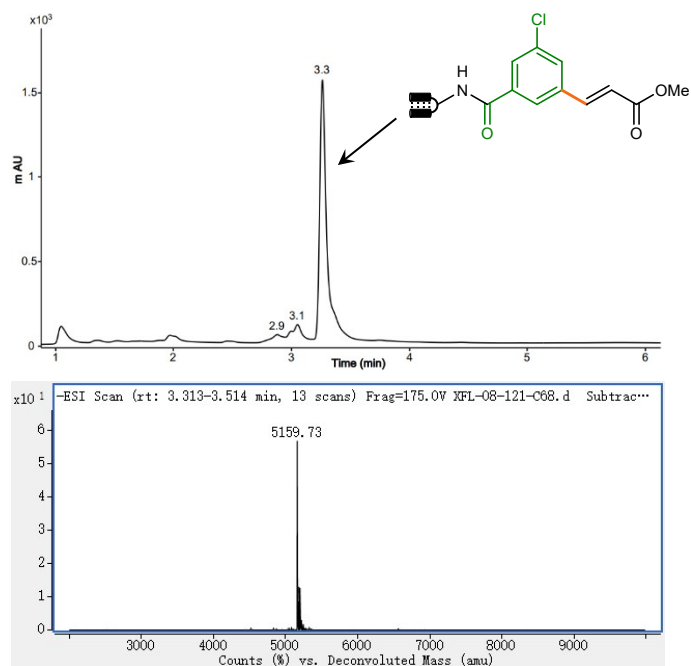

UPLC chromatograph and deconvoluted MS of **5dc**.

**Conversion: 90%**

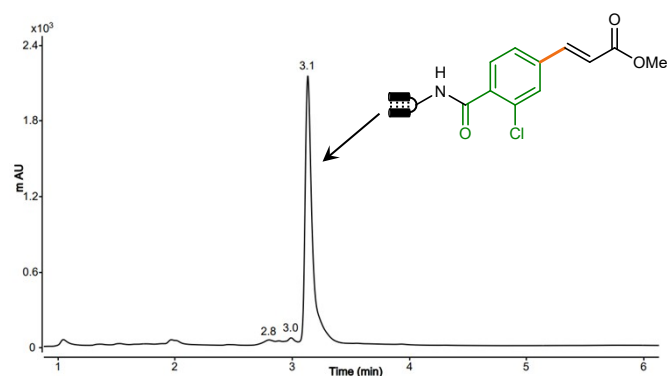

**Calculated Mass: 5160 Da; Found Mass: 5160 Da**

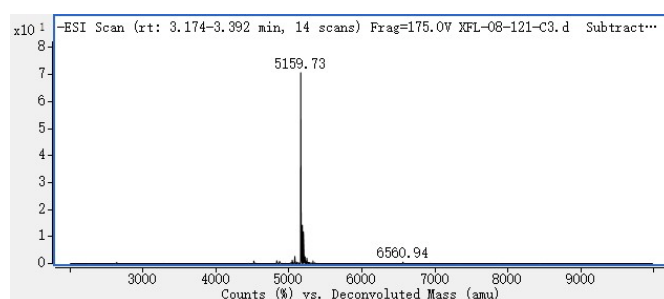

UPLC chromatograph and deconvoluted MS of **5dd**

**Conversion: 92%**

**Calculated Mass: 5160 Da; Found Mass: 5160 Da**

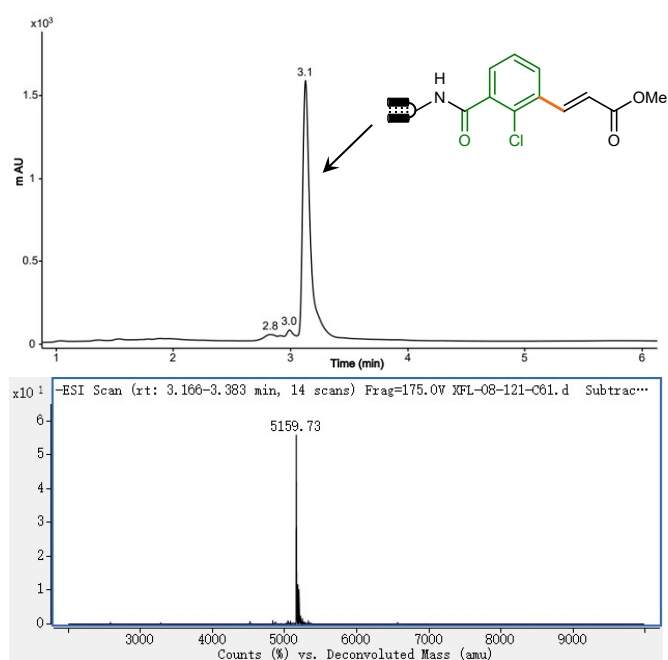

UPLC chromatograph and deconvoluted MS of **5de**.

**Conversion: 90%**

**Calculated Mass: 5160 Da; Found Mass: 5160 Da**

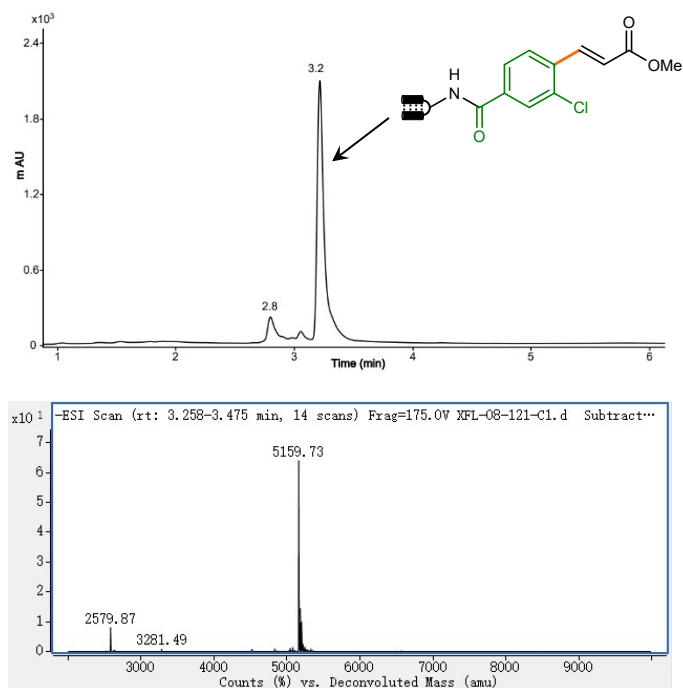

UPLC chromatograph and deconvoluted MS of **5df**.

**Conversion: 63%**

**Calculated Mass: 5139 Da; Found Mass: 5139 Da**

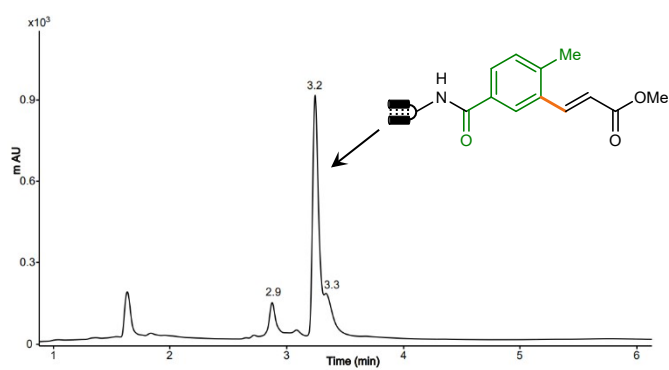

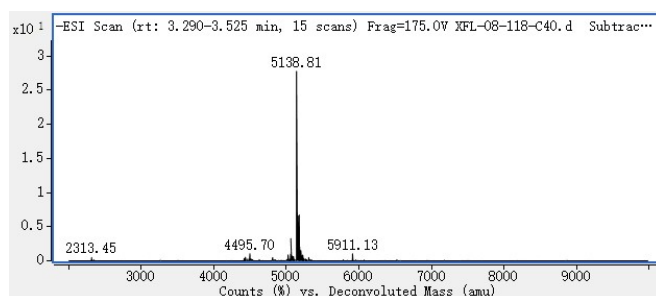

UPLC chromatograph and deconvoluted MS of **5dg**.

**Conversion: 73%**

**Calculated Mass: 5193 Da; Found Mass: 5194 Da**

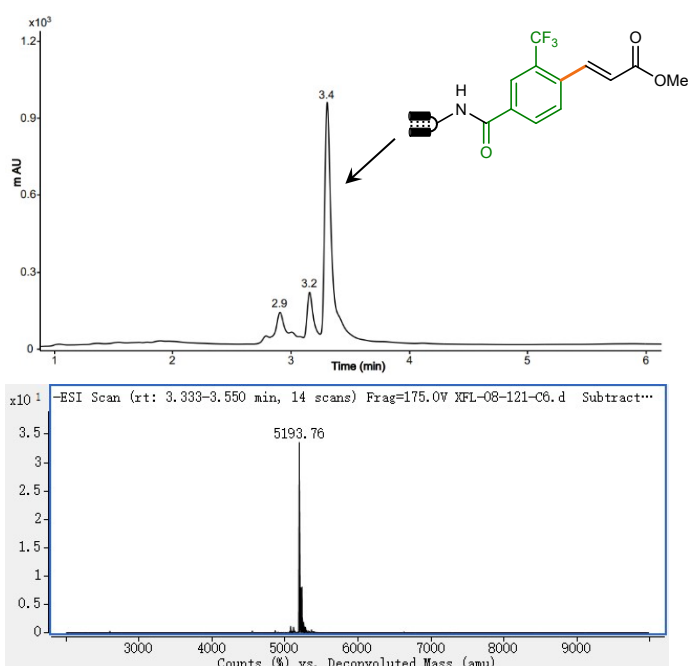

UPLC chromatograph and deconvoluted MS of **5dh**.

**Conversion: 92%**

**Calculated Mass: 5139 Da; Found Mass: 5139 Da**

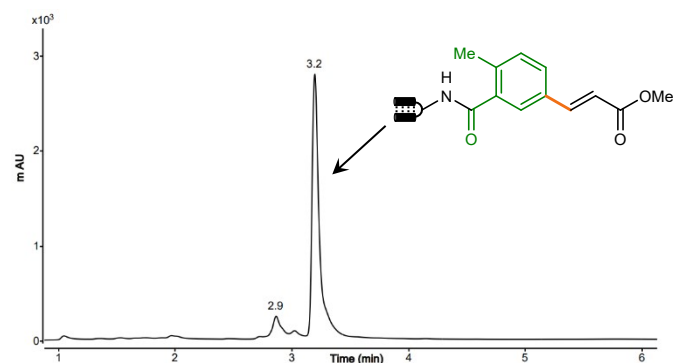

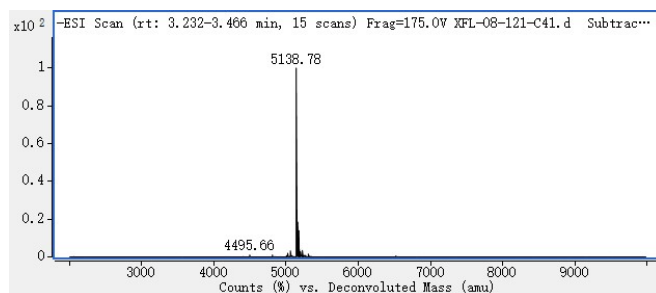

UPLC chromatograph and deconvoluted MS of **5di**.

**Conversion: 67%**

**Calculated Mass: 5153 Da; Found Mass: 5153 Da**

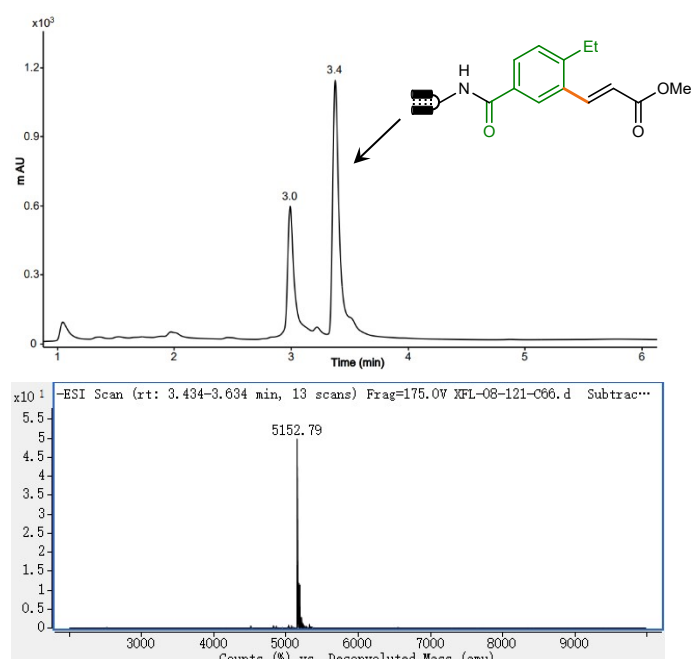

UPLC chromatograph and deconvoluted MS of **5dj**.

**Conversion: 76%**

**Calculated Mass: 5170 Da; Found Mass: 5170 Da**

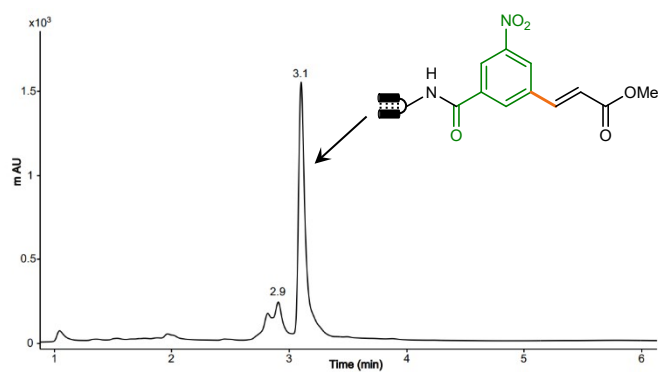



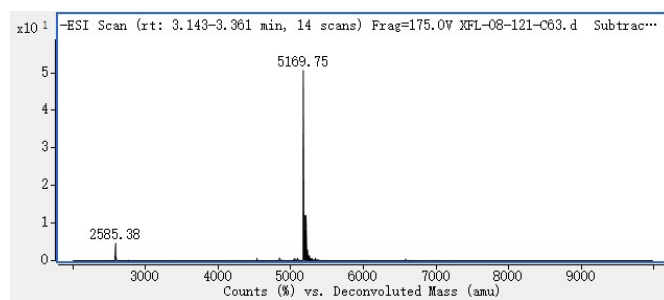

## 8.8 Substrate scope of anilines for the reverse on-DNA Heck reaction with 6a

UPLC chromatograph and deconvoluted MS of **5a**.

**Conversion: 80%**

**Calculated Mass: 5143 Da; Found Mass: 5143 Da**

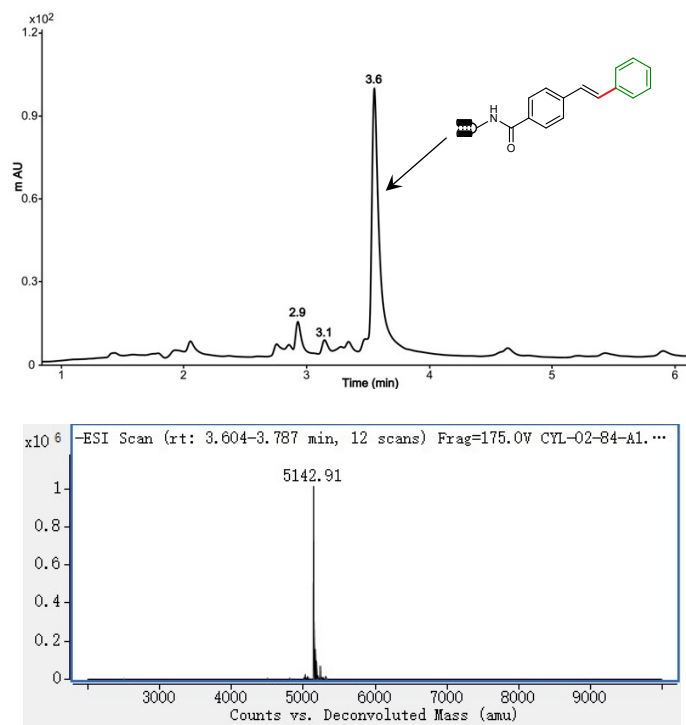

UPLC chromatograph and deconvoluted MS of **5c**.

**Conversion: 77%**

**Calculated Mass: 5173 Da; Found Mass: 5173 Da**

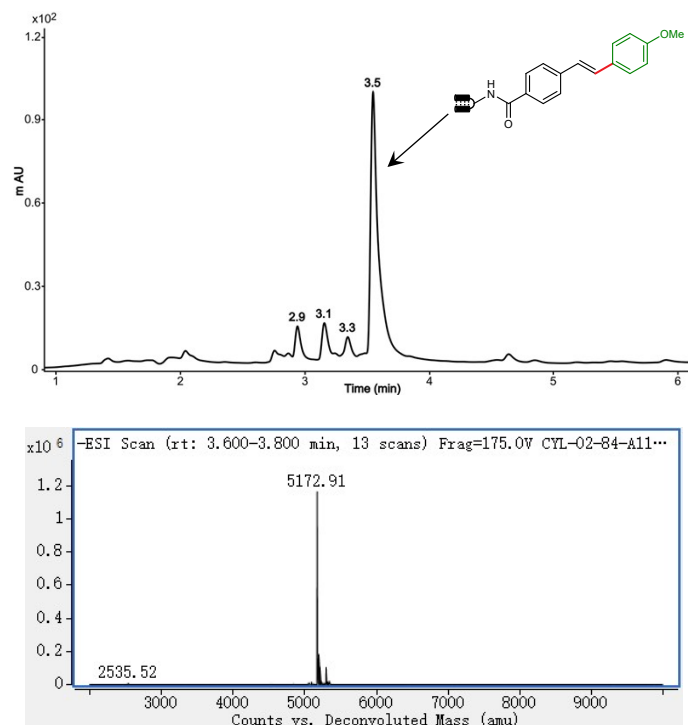

UPLC chromatograph and deconvoluted MS of **5g**.

**Conversion: 89%**

**Calculated Mass: 5188 Da; Found Mass: 5188 Da**

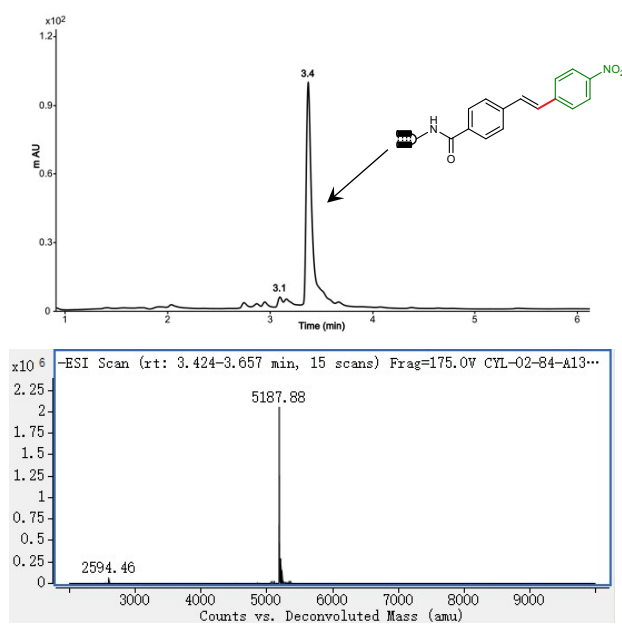

UPLC chromatograph and deconvoluted MS of **5m**.

**Conversion: 57%**

**Calculated Mass: 5187 Da; Found Mass: 5187 Da**

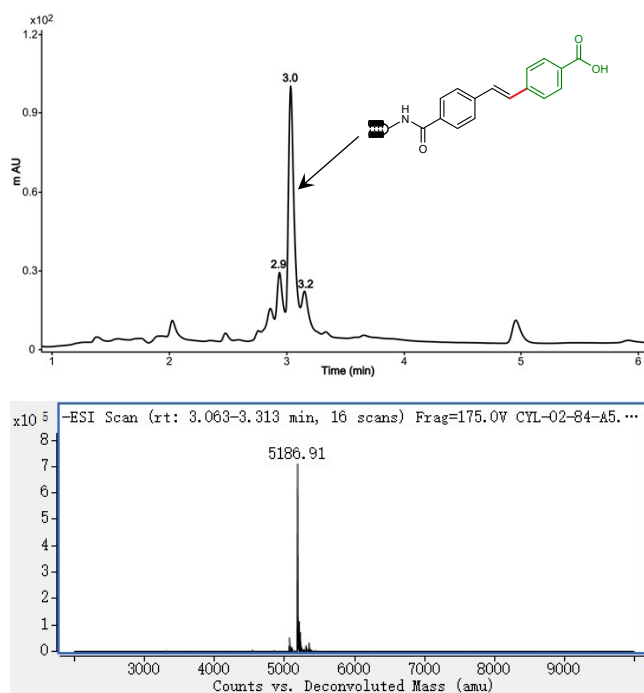

UPLC chromatograph and deconvoluted MS of **5k**.

**Conversion: 55%**

**Calculated Mass: 5168 Da; Found Mass: 5168 Da**

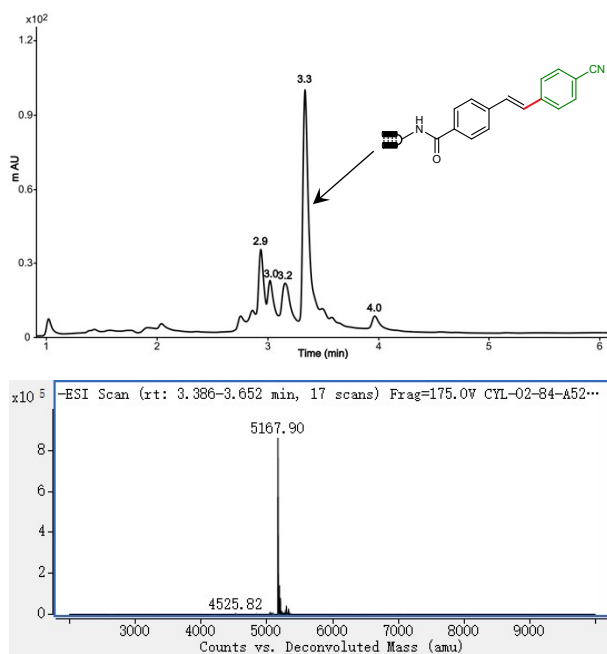

UPLC chromatograph and deconvoluted MS of **5o**.

**Conversion: 85%**

**Calculated Mass: 5201 Da; Found Mass: 5201 Da**

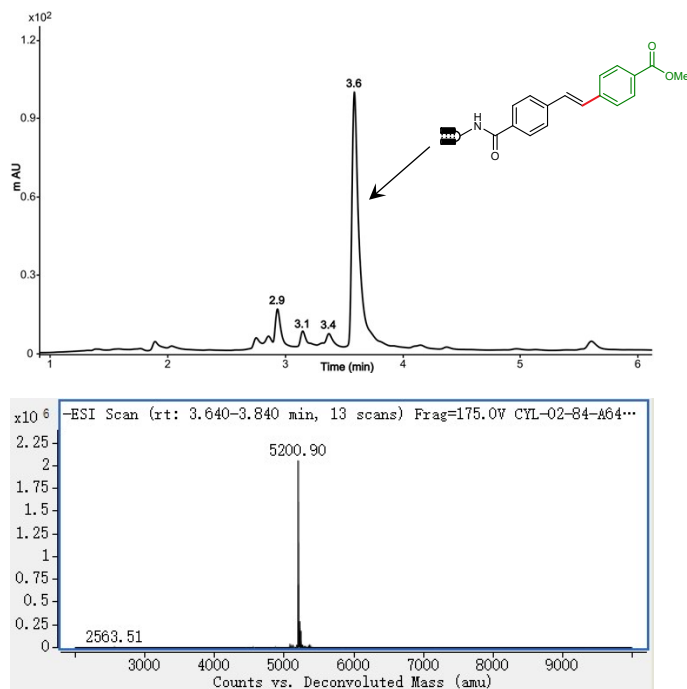

UPLC chromatograph and deconvoluted MS of **5aa**.

**Conversion: 72%**

**Calculated Mass: 5177 Da; Found Mass: 5177 Da**

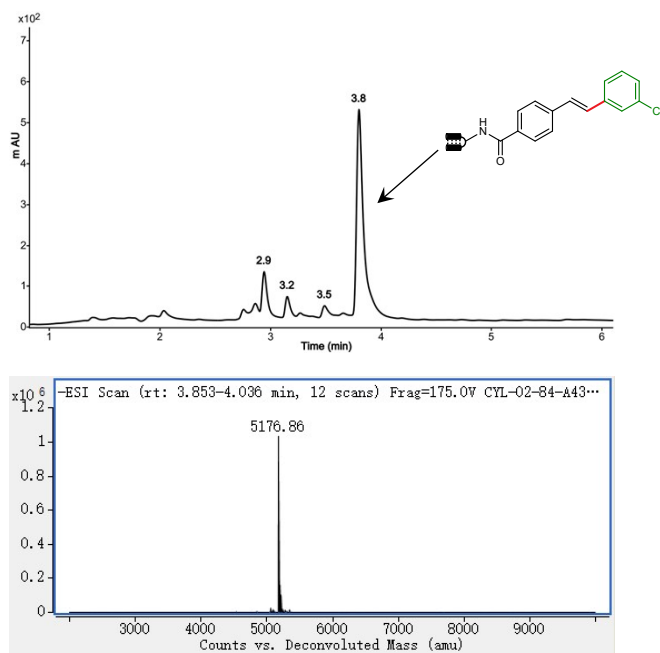

UPLC chromatograph and deconvoluted MS of **5di**.

**Conversion: 70%**

**Calculated Mass: 5173 Da; Found Mass: 5173 Da**

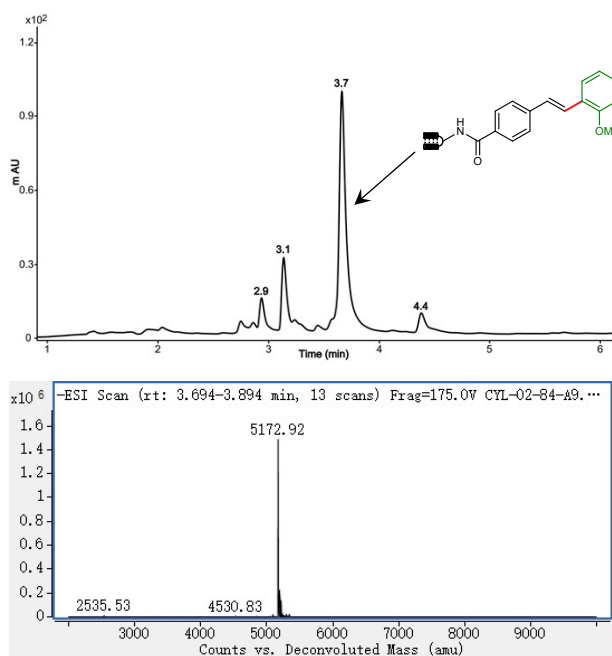

UPLC chromatograph and deconvoluted MS of **5dj**.

**Conversion: 89%**

**Calculated Mass: 5211 Da; Found Mass: 5211 Da**

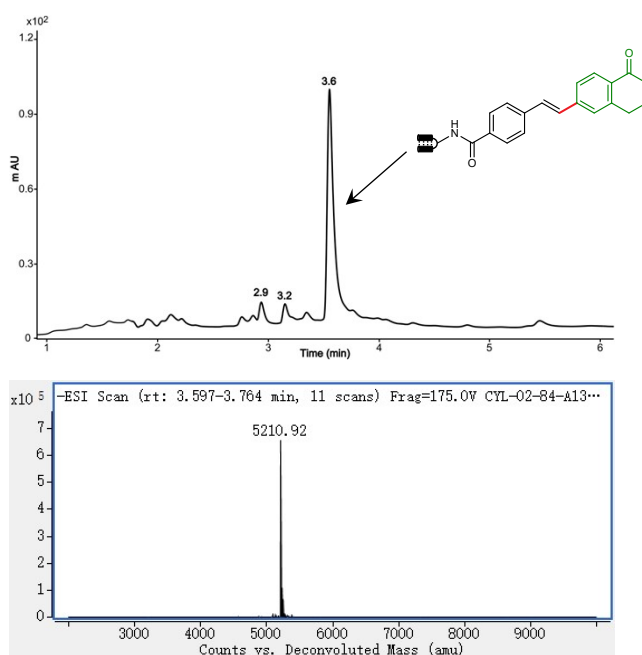

UPLC chromatograph and deconvoluted MS of **5dk**.

**Conversion: 77%**

**Calculated Mass: 5221 Da; Found Mass: 5221 Da**

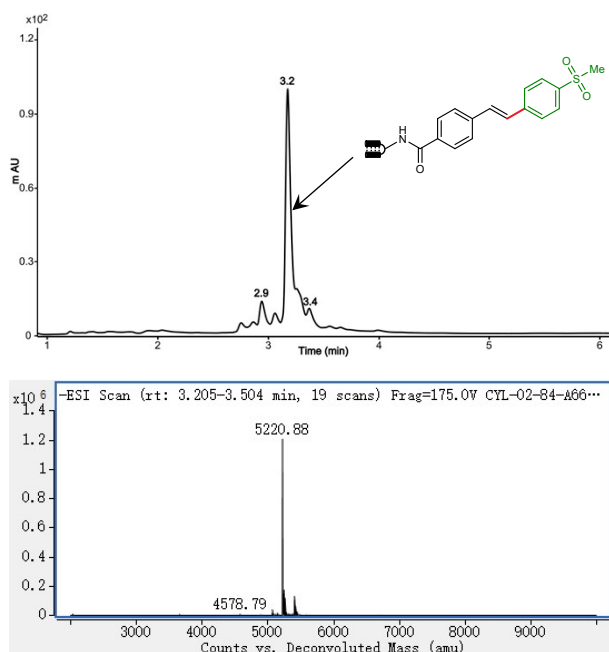

UPLC chromatograph and deconvoluted MS of **5dl**.

**Conversion: 64%**

**Calculated Mass: 5211 Da; Found Mass: 5211 Da**

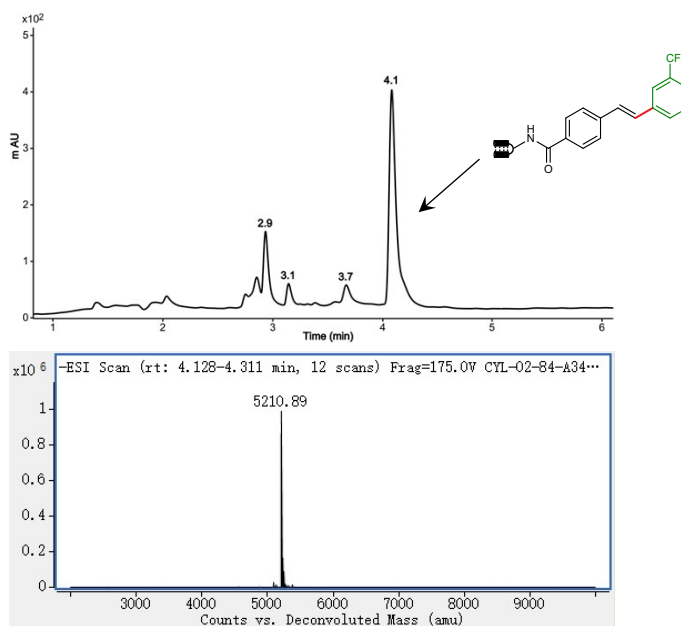

UPLC chromatograph and deconvoluted MS of **5dm**.

**Conversion: 68%**

**Calculated Mass: 5211 Da; Found Mass: 5211 Da**

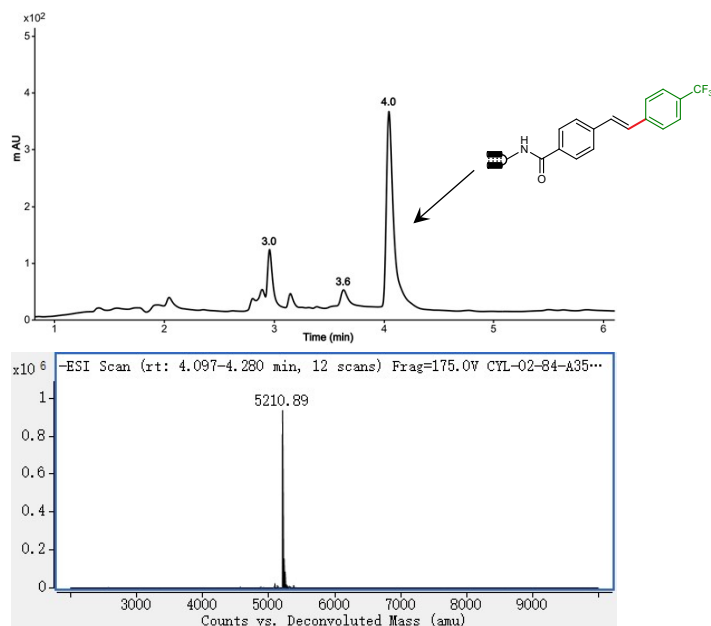

UPLC chromatograph and deconvoluted MS of **5dn**.

**Conversion: 76%**

**Calculated Mass: 5161 Da; Found Mass: 5161 Da**

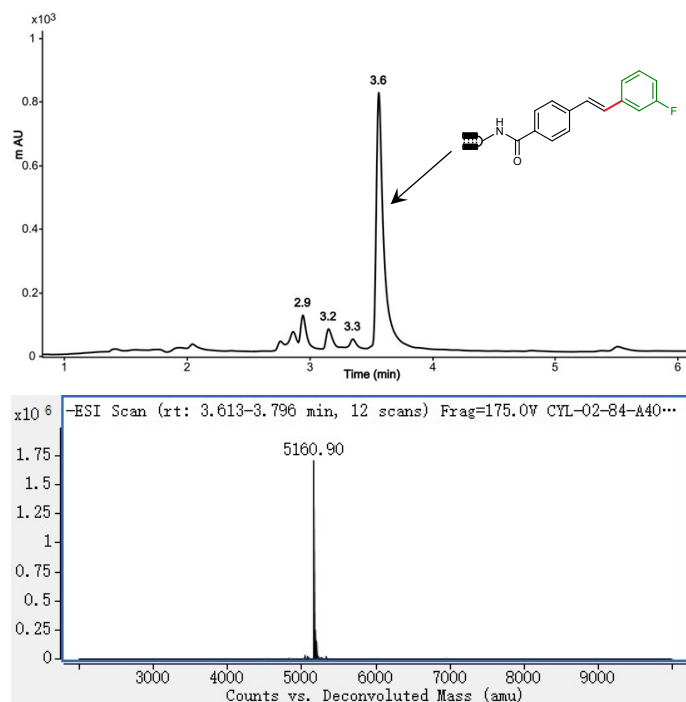



## 8.9 Substrate scope of DNA-conjugated arylamines for the On-DNA Hiyama coupling

UPLC chromatograph and deconvoluted MS of **10a**.

**Conversion: 67%**

**Calculated Mass: 5117 Da; Found Mass: 5117 Da**

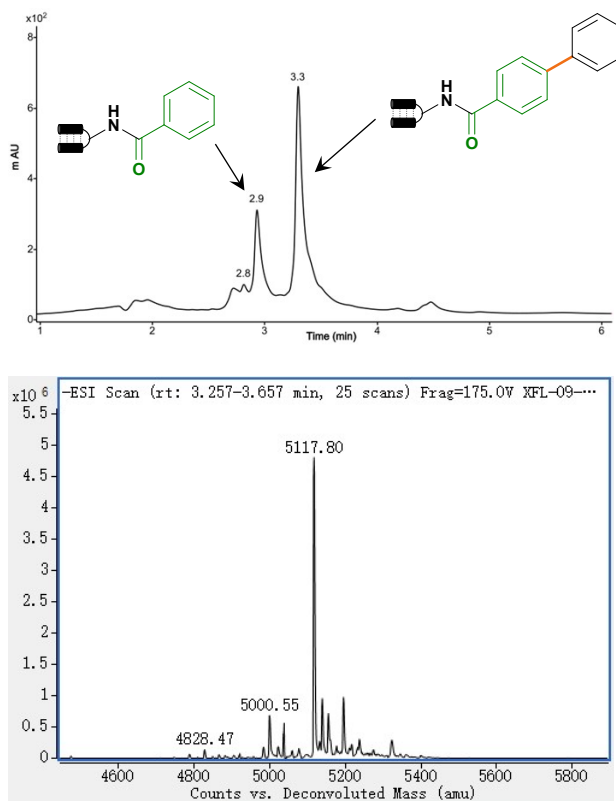

UPLC chromatograph and deconvoluted MS of **10b**.

**Conversion: 61%**

**Calculated Mass: 5117 Da; Found Mass: 5117 Da**

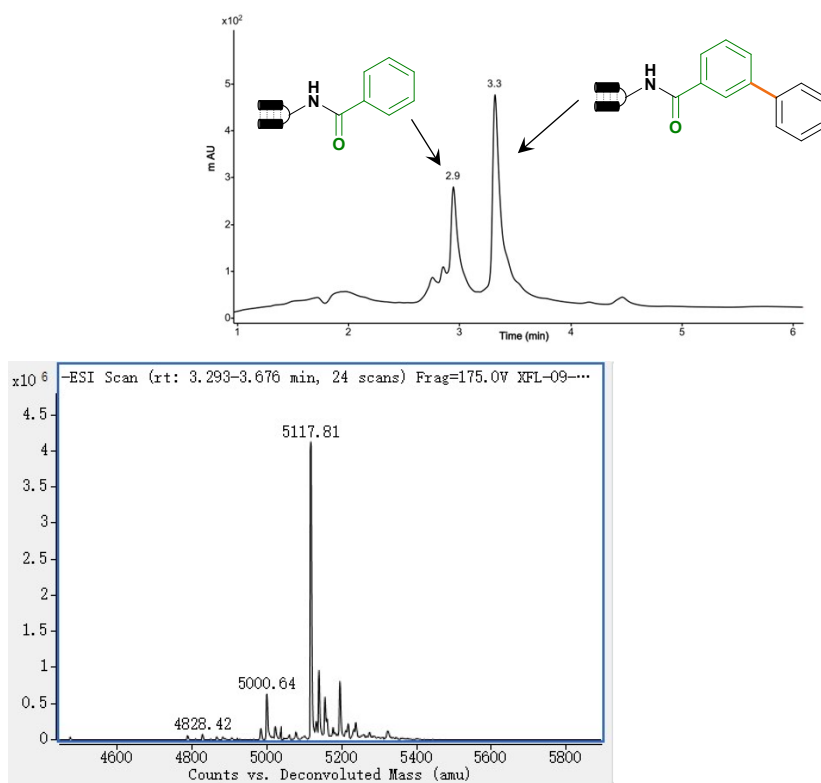

UPLC chromatograph and deconvoluted MS of **10c**.

**Conversion: 66%**

**Calculated Mass: 5131 Da; Found Mass: 5131 Da**

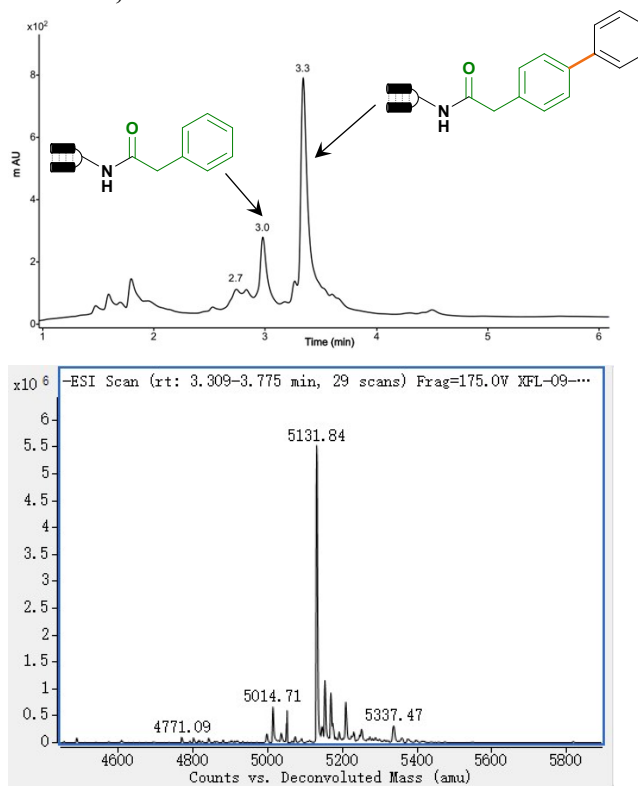

UPLC chromatograph and deconvoluted MS of **10d**.

**Conversion: 63%**

**Calculated Mass: 5149 Da; Found Mass: 5149 Da**

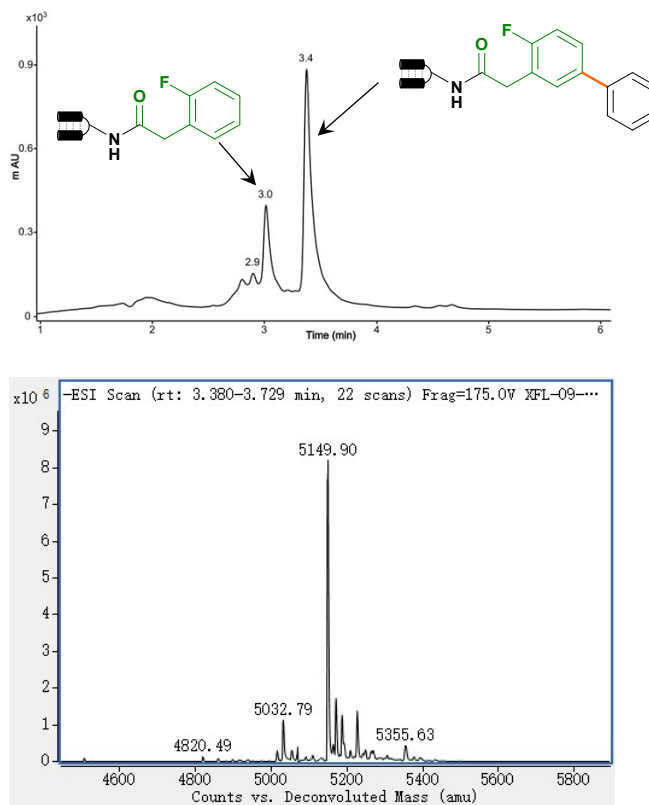

UPLC chromatograph and deconvoluted MS of **10e**.

**Conversion: 57%**

**Calculated Mass: 5173 Da; Found Mass: 5173 Da**

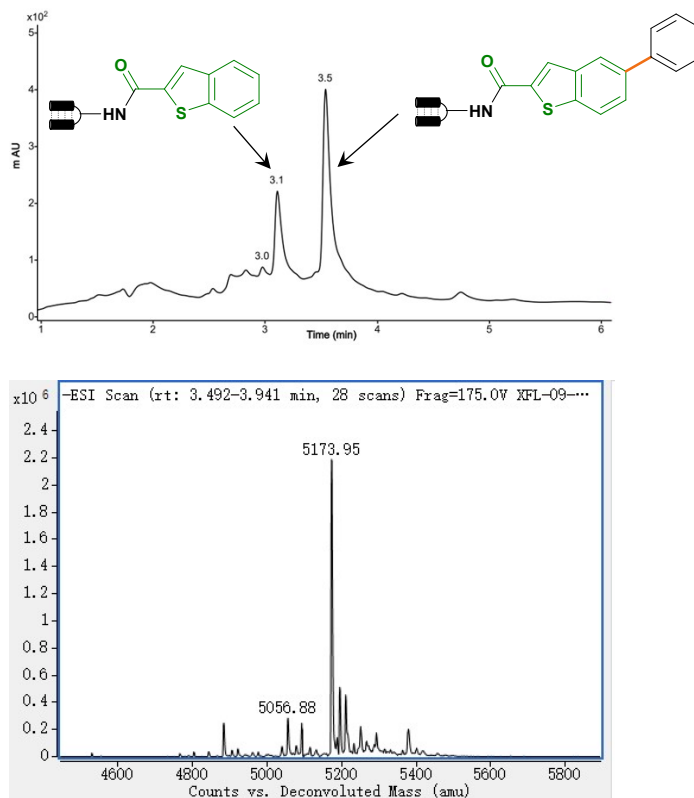

UPLC chromatograph and deconvoluted MS of **10f**.

**Conversion: 51%**

**Calculated Mass: 5147 Da; Found Mass: 5147 Da**

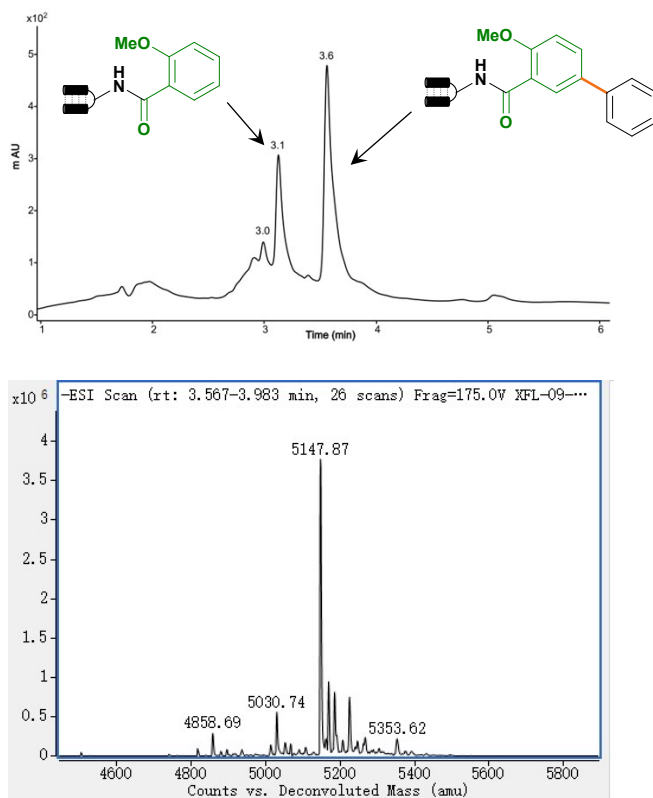

## 9. Reference

1. P. Yang, X. Wang, B. Li, Y. Yang, J. Yue, Y. Suo, H. Tong, G. He, X. Lu, G. Chen, *Chem. Sci.* 2021, **12**, 5804-5810.
2. A. Harada, *J. Am. Chem. Soc.* 2008, **130**.
3. Y. Ding, J. L. DeLorey, M. A. Clark, *Bioconjugate Chem.* 2016, **27**, 2597-2600.
4. X. Wang, H. Sun, J. Liu, W. Zhong, M. Zhang, H. Zhou, D. Dai, X. Lu, *Org. Lett.* 2019, **21**, 719-723.
5. N. Ohtsuka, M. Okuno, Y. Hoshino, K. Honda, *Org. Biomol. Chem.* 2016, **14**, 9046-9054.
6. N. L. Villadsen, K. M. Jacobsen, U. B. Keiding, E. T. Weibel, B. Christiansen, T. Vosegaard, M. Bjerring, F. Jensen, M. Johannsen, T. Tørring, T. B. Poulsen, *Nat. Chem.* 2016, **9**, 264-272.
7. J. Zhang, J. Peng, Y. Huang, L. Meng, Q. Li, F. Xiong, X. Li, *Angew. Chem. Int. Ed.* 2020, **59**, 17525-17532.
8. G. Li, Y. Liu, Y. Liu, L. Chen, S. Wu, Y. Liu, X. Li, *Angew. Chem. Int. Ed.* 2013, **52**, 9544-9549.
